# Supplementary material for: Association of lifestyle-related factors with circadian onset patterns of acute myocardial infarction: a prospective observational study in Japan
Source: PubMed Central journal article supplement — BMJ Open. 2014 Jun 6;4(6):e005067. doi: 10.1136/bmjopen-2014-005067 (PMC4054644; doi:10.1136/bmjopen-2014-005067), 2014-06-06
Supplement: bmjopen-2014-005067.draft_revisions.pdf [file bmjopen-2014-005067.draft_revisions.pdf]

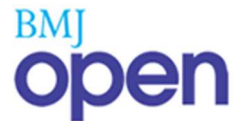

**Influence of Lifestyle-related Factors on Circadian Onset  
Patterns of Acute Myocardial Infarction: a Prospective  
Observational Study in Japan**

|                                 |                                                                                                                                                                                                                                                                                                                                                                                                                                                                                                                                                                                                                                                                                                                                                                                                                                                                                                                                                                                                                                                                                                                                                                                                                                                                                                                                                                                                                                                                                                                                                                                                                                                                                                                            |
|---------------------------------|----------------------------------------------------------------------------------------------------------------------------------------------------------------------------------------------------------------------------------------------------------------------------------------------------------------------------------------------------------------------------------------------------------------------------------------------------------------------------------------------------------------------------------------------------------------------------------------------------------------------------------------------------------------------------------------------------------------------------------------------------------------------------------------------------------------------------------------------------------------------------------------------------------------------------------------------------------------------------------------------------------------------------------------------------------------------------------------------------------------------------------------------------------------------------------------------------------------------------------------------------------------------------------------------------------------------------------------------------------------------------------------------------------------------------------------------------------------------------------------------------------------------------------------------------------------------------------------------------------------------------------------------------------------------------------------------------------------------------|
| Journal:                        | <i>BMJ Open</i>                                                                                                                                                                                                                                                                                                                                                                                                                                                                                                                                                                                                                                                                                                                                                                                                                                                                                                                                                                                                                                                                                                                                                                                                                                                                                                                                                                                                                                                                                                                                                                                                                                                                                                            |
| Manuscript ID:                  | bmjopen-2014-005067                                                                                                                                                                                                                                                                                                                                                                                                                                                                                                                                                                                                                                                                                                                                                                                                                                                                                                                                                                                                                                                                                                                                                                                                                                                                                                                                                                                                                                                                                                                                                                                                                                                                                                        |
| Article Type:                   | Research                                                                                                                                                                                                                                                                                                                                                                                                                                                                                                                                                                                                                                                                                                                                                                                                                                                                                                                                                                                                                                                                                                                                                                                                                                                                                                                                                                                                                                                                                                                                                                                                                                                                                                                   |
| Date Submitted by the Author:   | 17-Feb-2014                                                                                                                                                                                                                                                                                                                                                                                                                                                                                                                                                                                                                                                                                                                                                                                                                                                                                                                                                                                                                                                                                                                                                                                                                                                                                                                                                                                                                                                                                                                                                                                                                                                                                                                |
| Complete List of Authors:       | Edahiro, Ryuya; Osaka University Graduate School of Medicine, Department of Cardiovascular Medicine<br>Sakata, Yasuhiko; Tohoku University Graduate School of Medicine, Department of Cardiovascular Medicine<br>Nakatani, Daisaku; Osaka University Graduate School of Medicine, Department of Cardiovascular Medicine<br>Suna, Shinichiro; Osaka University Graduate School of Medicine, Department of Cardiovascular Medicine<br>Usami, Masaya; Osaka University Graduate School of Medicine, Department of Cardiovascular Medicine<br>Matsumoto, Sen; Osaka University Graduate School of Medicine, Department of Cardiovascular Medicine<br>Hara, Masahiko; Osaka University Graduate School of Medicine, Department of Cardiovascular Medicine<br>Kitamura, Tetsuhisa; Osaka University Graduate School of Medicine, Department of Social and Environmental Medicine<br>Sato, Hiroshi; Kwansai Gakuin University, School of Human Welfare Studies Health Care Center and Clinic<br>Yamashita, Shizuya; Osaka University Graduate School of Medicine, Department of Community Medicine<br>Nanto, Shinsuke; Osaka University Graduate School of Medicine, Department of Advanced Cardiovascular Therapeutics<br>Hikoso, Shungo; Osaka University Graduate School of Medicine, Department of Cardiovascular Medicine<br>Sakata, Yasushi; Osaka University Graduate School of Medicine, Department of Cardiovascular Medicine<br>Hori, Ma; Osaka Medical Center for Cancer and Cardiovascular Diseases, Hamasaki, Toshimitsu; Osaka University Graduate School of Medicine, Department of Biomedical Statistics<br>Komuro, Issei; University of Tokyo Graduate School of Medicine, Department of Cardiovascular Medicine |
| <b>Primary Subject Heading</b>: | Cardiovascular medicine                                                                                                                                                                                                                                                                                                                                                                                                                                                                                                                                                                                                                                                                                                                                                                                                                                                                                                                                                                                                                                                                                                                                                                                                                                                                                                                                                                                                                                                                                                                                                                                                                                                                                                    |
| Secondary Subject Heading:      | Cardiovascular medicine, Epidemiology                                                                                                                                                                                                                                                                                                                                                                                                                                                                                                                                                                                                                                                                                                                                                                                                                                                                                                                                                                                                                                                                                                                                                                                                                                                                                                                                                                                                                                                                                                                                                                                                                                                                                      |
| Keywords:                       | Myocardial infarction < CARDIOLOGY, Cardiac Epidemiology < CARDIOLOGY, Ischaemic heart disease < CARDIOLOGY                                                                                                                                                                                                                                                                                                                                                                                                                                                                                                                                                                                                                                                                                                                                                                                                                                                                                                                                                                                                                                                                                                                                                                                                                                                                                                                                                                                                                                                                                                                                                                                                                |

1  
2  
3  
4  
5  
6  
7  
8  
9  
10  
11  
12  
13  
14  
15  
16  
17  
18  
19  
20  
21  
22  
23  
24  
25  
26  
27  
28  
29  
30  
31  
32  
33  
34  
35  
36  
37  
38  
39  
40  
41  
42  
43  
44  
45  
46  
47  
48  
49  
50  
51  
52  
53  
54  
55  
56  
57  
58  
59  
60

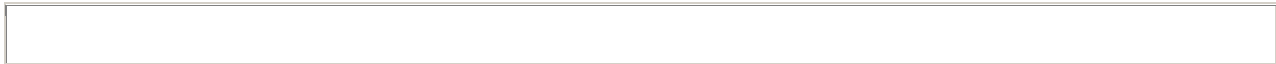

SCHOLARONE™  
Manuscripts

For peer review only

1  
2  
3  
4  
5  
6 Influence of Lifestyle-related Factors on Circadian Onset Patterns of  
7  
8  
9 Acute Myocardial Infarction: a Prospective Observational Study in  
10  
11  
12 Japan

13  
14  
15  
16  
17 Ryuya Eda<sup>1)2)</sup>, Yasuhiko Sakata, MD, PhD<sup>1)3)4)</sup>, Daisaku Nakatani, MD, PhD

18  
19  
20 <sup>1)</sup>, Shinichiro Suna, MD, PhD<sup>1)</sup>, Masaya Usami, MD<sup>1)</sup>, Sen Matsumoto, MD<sup>1)</sup>,

21  
22  
23 Masahiko Hara, MD<sup>1)</sup>, Tetsuhisa Kitamura, MD, MSc, DrPH<sup>5)</sup>, Hiroshi Sato, MD,

24  
25  
26 PhD<sup>6)</sup>, Shizuya Yamashita, MD, PhD<sup>1)7)</sup>, Shinsuke Nanto, MD, PhD<sup>1)3)</sup>, Shungo

27  
28  
29 Hikoso, MD, PhD<sup>1)</sup>, Yasushi Sakata, MD, PhD<sup>1)</sup>, Masatsugu Hori, MD, PhD<sup>8)</sup>,

30  
31  
32 Toshimitsu Hamasaki, PhD<sup>2)</sup>, Issei Komuro, MD, PhD<sup>1)9)</sup>, on behalf of the OACIS

33  
34  
35 Investigators

36  
37  
38  
39  
40 1: Department of Cardiovascular Medicine, Osaka University Graduate School of

41  
42  
43 Medicine, Suita, Japan; 2: Department of Biomedical Statistics, Osaka University

44  
45  
46 Graduate School of Medicine, Suita, Japan; 3: Department of Advanced

47  
48  
49 Cardiovascular Therapeutics, Osaka University Graduate School of Medicine,

50  
51  
52 Suita, Japan; 4: Department of Cardiovascular Medicine, Tohoku University

53  
54  
55 Graduate School of Medicine, Sendai, Japan; 5: Department of Social and

1  
2  
3  
4  
5  
6 Environmental Medicine, Osaka University Graduate School of Medicine, Suita,  
7  
8  
9 Japan; 6: School of Human Welfare Studies Health Care Center and Clinic,  
10  
11  
12 Kwansei Gakuin University, Nishinomiya, Japan; 7: Department of Community  
13  
14  
15 Medicine, Osaka University Graduate School of Medicine, Suita, Japan; 8:  
16  
17  
18 Osaka Prefectural Hospital Organization Osaka Medical Center for Cancer and  
19  
20  
21 Cardiovascular Diseases, Osaka, Japan; 9: Department of Cardiovascular  
22  
23  
24 Medicine, University of Tokyo Graduate School of Medicine, Tokyo, Japan  
25  
26  
27  
28

29 Short title: AMI Onset Patterns and Lifestyle-related Factors  
30  
31  
32  
33  
34

35 Total word count of the text: 3,262 words  
36  
37  
38  
39  
40

41 Address for correspondence:  
42  
43

44 Yasuhiko Sakata, MD, PhD  
45

46 Department of Cardiovascular Medicine  
47  
48

49 Osaka University Graduate School of Medicine  
50  
51

52 2-2 Yamada-oka, Suita, 565-0871, Japan.  
53  
54

55 Tel: +81-6-6879-6612, Fax: +81-6-6879-6613,  
56  
57  
58  
59  
60

E-mail: sakatayk@cardiology.med.osaka-u.ac.jp

For peer review only

1  
2  
3  
4  
5  
6  
7  
8  
9  
10  
11  
12  
13  
14  
15  
16  
17  
18  
19  
20  
21  
22  
23  
24  
25  
26  
27  
28  
29  
30  
31  
32  
33  
34  
35  
36  
37  
38  
39  
40  
41  
42  
43  
44  
45  
46  
47  
48  
49  
50  
51  
52  
53  
54  
55  
56  
57  
58  
59  
60

**Abstract**

**Objective:** The onset of acute myocardial infarction (AMI) shows characteristic circadian variations involving a definite morning peak and less-defined nighttime peak. However, the factors influencing circadian patterns of AMI onset and their influence on morning and nighttime peaks have not been fully elucidated.

**Design, Setting, and Participants:** An analysis of patients registered between 1998 and 2008 in the Osaka Acute Coronary Insufficiency Study, which is a prospective, multicenter observational study of AMI patients in the Osaka region of Japan. The present study included 7755 consecutive patients with a known time of AMI onset.

**Main Outcomes and Measures:** A mixture of two von Mises distributions was used to examine whether a circadian pattern of AMI had uniform, unimodal, or bimodal distribution, and the likelihood ratio test was then used to select the best circadian pattern among them. The hierarchical likelihood ratio test was used to identify factors affecting the circadian patterns of AMI onset. The Kaplan-Meier

1  
2  
3  
4  
5  
6 method was used to estimate survival curves of one-year mortality according to  
7  
8  
9 AMI onset time.

10  
11  
12  
13  
14 **Results:** The overall population had a bimodal circadian pattern of AMI onset  
15  
16 characterized by a high and sharp morning peak and a lower and less-defined  
17  
18 nighttime peak (bimodal:  $p < 0.001$ ). Although several lifestyle-related factors had  
19  
20 a statistically significant association with the circadian patterns of AMI onset,  
21  
22 serum triglyceride levels had the most prominent impact on circadian patterns of  
23  
24 AMI onset. Patients with triglyceride  $\geq 150$  mg/dl on admission had only one  
25  
26 morning peak in the circadian pattern of AMI onset during the weekdays, with no  
27  
28 peaks detected on weekends, whereas all other subgroups had two peaks  
29  
30 throughout the week.  
31  
32  
33  
34  
35  
36  
37  
38  
39  
40  
41  
42

43  
44 **Conclusions:** The circadian pattern of AMI onset was characterized by  
45  
46 bimodality. Notably, several lifestyle-related factors, particularly serum  
47  
48 triglyceride levels, had a strong relation with the circadian pattern of AMI onset.  
49  
50  
51  
52  
53  
54  
55  
56  
57  
58  
59  
60

### Strengths and limitations of this study

- We comprehensively analyzed the circadian patterns of AMI onset in a large, multicenter cohort of patients in relation to patient characteristics, lifestyle factors, and day of the week.
- A mixture of two von Mises distributions revealed that the circadian pattern of AMI onset exhibited bimodality.
- Several lifestyle-related factors were shown to influence circadian patterns of AMI onset, depending on the day of the week. In particular, it was demonstrated that elevated serum triglyceride levels on admission accentuated morning peak of AMI onset during the weekdays.
- Subjects were limited to those who were hospitalized for AMI.
- Laboratory data were evaluated on admission.



## Introduction

Onset patterns of acute myocardial infarction (AMI) exhibit circadian variation that is characterized by an increased frequency in the morning and a secondary peak incidence at nighttime.<sup>1</sup> Several studies have confirmed that AMI onset exhibits a bimodal circadian pattern, with peaks occurring in the morning hours<sup>2-4</sup> and nighttime hours.<sup>1,4-7</sup> However, it is not well understood what factors, particularly among lifestyle-related factors, influence the circadian patterns of AMI. Moreover, although these patterns appear to vary according to the day of the week,<sup>8</sup> it is unclear how circadian patterns of AMI onset vary throughout the week, particularly, in association with socioeconomic factors.

Because AMI and subsequent ischemic heart failure are the leading causes of death in both developed and developing countries, primary prevention of AMI is a major healthcare issue worldwide. Accordingly, identifying potential factors influencing the circadian pattern of AMI may help in the clinical management of patients for preventing the onset of AMI.

In the present study, we comprehensively analyzed the circadian patterns of AMI onset in a large, multicenter cohort of patients in relation to patient characteristics, lifestyle factors, and day of the week.

## Methods

### OACIS registry and study subjects

The OACIS is a prospective, multicenter observational study collecting demographic, procedural, biological, and outcome data as well as blood samples from AMI patients hospitalized at 25 collaborating hospitals from the Osaka region of Japan (UMIN-Clinical Trial Registry ID: UMIN000004575).<sup>9-10</sup> A diagnosis of AMI was made if the patient fulfilled at least two of the following three criteria; 1) history of central chest pressure, pain, or tightness lasting 30 min, (2) typical electrocardiographic changes (i.e., ST-segment elevation  $\geq 0.1$  mV in 1 standard limb lead or 2 precordial leads, ST-segment depression  $\geq 0.1$  mV in 2 leads, abnormal Q waves, or T-wave inversion in 2 leads), and (3) an increase in serum creatine kinase levels of two times the upper normal limit in each hospital. All the collaborating hospitals were encouraged to enroll consecutive patients with AMI.

We prospectively collected data by research cardiologists and trained research nurses using a specific reporting form, and the following variables were

1  
2  
3  
4  
5  
6 extracted from the OACIS registry database: age, gender, working status, body  
7  
8  
9 mass index (BMI), coronary risk factors (diabetes, hypertension, dyslipidemia,  
10  
11  
12 smoking, drinking, previous myocardial infarction, multivessel disease, and  
13  
14 collateral circulation), clinical presentation on admission (KILLIP classification,  
15  
16 initial TIMI flow, and ST-elevation myocardial infarction), coronary angiography  
17  
18 data, reperfusion therapy, laboratory data on admission (hemoglobin A1c, total  
19  
20 cholesterol, low- and high-density lipoprotein cholesterol, triglyceride, and  
21  
22 estimated glomerular filtration rate) and medications at discharge (RAS  
23  
24 inhibitors, beta-blocker, calcium channel blocker, statin, anti-platelet agent, and  
25  
26 diuretics). Diabetes mellitus was defined as fasting plasma glucose  $\geq 126$  mg/dl,  
27  
28 hemoglobin A1c  $\geq 6.5\%$  or a history of antidiabetic therapy. Hypertension was  
29  
30 defined as a history of systolic blood pressure  $\geq 140$  mmHg, diastolic blood  
31  
32 pressure  $\geq 90$  mmHg, or antihypertensive therapy. Dyslipidemia was defined as  
33  
34 fasting total cholesterol  $\geq 220$  mg/dl, low-density lipoprotein cholesterol  $\geq 140$   
35  
36 mg/dl, high-density lipoprotein cholesterol  $\leq 40$  mg/dl, fasting triglycerides  $\geq 150$   
37  
38 mg/dl, or antilipidemic therapy.  
39  
40  
41  
42  
43  
44  
45  
46  
47  
48  
49  
50

51  
52 The study protocol has been approved by the ethics committee of each  
53  
54  
55 participating hospital. All in-hospital data were obtained after written informed  
56  
57  
58  
59  
60

1  
2  
3  
4  
5  
6 consent and were then transmitted to the data collection center at the  
7  
8  
9 Department of Cardiovascular Medicine, Osaka University Graduate School of  
10  
11  
12 Medicine, Suita, Japan for processing and analysis. The corresponding authors  
13  
14  
15 had full access and validated to all data in the study.

16  
17  
18 In the present study, we analyzed 7755 AMI patients whose time of AMI onset  
19  
20  
21 was definitely identified among the 8603 consecutive patients registered in the  
22  
23  
24 OACIS registry between 1998 and 2008. Patients' baseline characteristics are  
25  
26  
27 presented in Table 1.

### 28 29 30 31 32 **Statistical analysis**

33  
34  
35 Continuous variables were summarized as quartiles and were compared by the  
36  
37  
38 Wilcoxon rank sum test for two-group comparisons, and the Kruskal-Wallis test  
39  
40  
41 for four-group comparisons. Categorical variables were presented as number  
42  
43  
44 and percentage, and were compared by the chi-square test. A mixture of two von  
45  
46  
47 Mises distributions was used to examine whether a circadian pattern of AMI had  
48  
49  
50 uniform (no peak), unimodal (one peak), or bimodal distribution (two peaks), and  
51  
52  
53 the likelihood ratio test was then used to select the best circadian pattern among  
54  
55  
56 them.<sup>11</sup> In addition, the hierarchical likelihood ratio test was assessed to identify  
57  
58  
59  
60

1  
2  
3  
4  
5  
6 factors affecting the circadian patterns of AMI onset. The Kaplan-Meier method  
7  
8  
9 was used to estimate survival curves of one-year mortality according to AMI  
10  
11  
12 onset time (morning [6:00-11:59 h], afternoon [12:00-17:59 h], evening  
13  
14 [18:00-23:59 h], and nighttime [0:00-5:59 h]). The log-rank test was used to  
15  
16  
17 compare survival curves between the groups, and the Cox proportional hazards  
18  
19  
20 regression model was used to estimate hazard ratios and 95% confidence  
21  
22  
23 intervals (CI). To reduce potential confounding effects due to patient background  
24  
25  
26 variability in the comparison between the afternoon-onset and other groups, a  
27  
28  
29 stratified Cox proportional hazards regression model was used, in which the  
30  
31  
32 potential confounding variables were included into the model as stratification  
33  
34  
35 factors. Statistical significance was set as  $p < 0.05$ . All statistical analyses were  
36  
37  
38 performed using an in-house validated Fortran program or SAS version 9.3  
39  
40  
41 (SAS Institute Inc., Cary, NC).  
42  
43  
44  
45

## 46 **Results**

### 47 **Bimodal circadian patterns of AMI onset in the overall population**

48  
49  
50 The daily patterns of AMI onset in our cohort of 7755 patients were first  
51  
52  
53 analyzed using the likelihood ratio test (Figure 1). In the overall population, AMI  
54  
55  
56  
57  
58  
59  
60

1  
2  
3  
4  
5  
6 onset clearly exhibited a circadian pattern consisting of two peaks (bimodal:  
7  
8  
9  $p < 0.001$ ): a primary peak at 9:01 h (95%CI: 8:53-9:08 h) and a secondary peak  
10  
11 at 20:11 h (95%CI: 19:48-20:34 h). The primary peak was more clearly defined  
12  
13 than the secondary peak in both the circular and columnar histograms (Figure  
14  
15 1A and 1B, respectively).  
16  
17  
18  
19

20  
21 Likelihood ratio test analysis revealed that the peak time of AMI onset  
22  
23 varied according to the day of the week (Figure 2). For example, the primary  
24  
25 peak onset time was earliest on Monday (8:24 h [95%CI: 8:04-8:44 h]) and latest  
26  
27 on Sunday (9:44 h [95%CI: 9:22-10:06 h]). On Tuesday, patients exhibited a  
28  
29 circadian pattern of AMI onset characterized by late primary (9:28 h [95%CI:  
30  
31 9:06-9:51 h]) and secondary peak onset times (21:13 h [95%CI: 20:40-21:46 h]),  
32  
33 whereas earlier peak onset times (8:43 h [95%CI: 8:15-9:10 h], and 19:09 h  
34  
35 [95%CI: 18:23-19:55 h]) were detected on Thursday. Notably, the evening peak  
36  
37 was higher, and sharper than the morning peak on Saturday (Figure 2).  
38  
39  
40  
41  
42  
43  
44  
45  
46  
47  
48

### 49 **Factors affecting circadian patterns of AMI onset**

50  
51 Hierarchical likelihood ratio analysis revealed that serum TG levels on admission,  
52  
53 smoking, age, drinking, blood glucose levels on admission, gender, and working  
54  
55  
56  
57  
58  
59  
60

1  
2  
3  
4  
5  
6 status had a statistically significant influence on the circadian pattern of AMI  
7  
8  
9 onset, whereas several other known risk factors for AMI, including HDL- and  
10  
11 LDL-cholesterol, Hba1c, hypertension, diabetes and dyslipidemia were not  
12  
13 related to the observed patterns (Figure 3, eTable1).  
14  
15

16  
17 Among the positively associated factors, serum TG levels on admission  
18  
19 had the greatest impact on the circadian pattern of AMI onset. Although the  
20  
21 likelihood ratio test demonstrated that patients with admission serum TG levels  
22  
23 of  $\geq 150$  mg/dl had the two characteristic peaks during the day, the peak pattern  
24  
25 clearly differed from the other subpopulation groups. In patients with admission  
26  
27 serum TG levels of  $\geq 150$  mg/d, both peaks occurred in the morning and nearly  
28  
29 overlapped (8:18 h and 8:47 h) (Figure 3A). Therefore, the subpopulation with  
30  
31 admission TG levels  $\geq 150$  mg/dl was considered to have a high frequency of  
32  
33 AMI onset only in the morning.  
34  
35  
36  
37  
38  
39  
40  
41  
42

43 The baseline characteristics and laboratory data of patients with serum  
44  
45 TG levels of  $\geq 150$  and  $< 150$  mg/dl on admission are shown in eTable2. In the  
46  
47 subpopulation with higher TG levels, the circadian patterns of AMI onset was  
48  
49 characterized by a large, sharp peak in the morning from Monday to Friday, but  
50  
51 no peaks were detected on Saturday and Sunday (bimodal:  $p=0.32$  and  $p=0.133$ ,  
52  
53  
54  
55  
56  
57  
58  
59  
60

1  
2  
3  
4  
5  
6 respectively) (eFigure 1). In contrast, patients with admission serum TG levels of  
7  
8  
9 <150 mg/dl had onset peaks that occurred in the morning and evening  
10  
11  
12 consistently throughout the week (eFigure 1).

13  
14 A likelihood ratio test demonstrated that other all subpopulations had two  
15  
16 AMI onset peaks during the day: one in the morning and the other in the evening  
17  
18 (Figure 3, eTable 1). The subpopulations that were grouped according to  
19  
20 smoking habit, age < 65 years old, male gender, and active employment had a  
21  
22 circadian pattern of AMI onset with a sharper primary peak and less-defined  
23  
24 sharp secondary peak compared to the other subpopulations (Figure 3B,C,F,G,  
25  
26 eTable1), although the peak heights were similar between the subpopulations,  
27  
28 with the exception of the smokers/nonsmokers subpopulations. The primary AMI  
29  
30 onset peak in the subpopulation of smokers was higher than that among  
31  
32 nonsmokers, whereas the secondary peaks were similar. Drinkers had a  
33  
34 circadian pattern of AMI onset that was characterized by a lower and less sharp  
35  
36 peak in the morning, and a higher, sharper and later peak in the evening (9:00 h  
37  
38 [95%CI: 8:48-9:13 h], 20:54 h [95%CI: 20:29-21:20 h]) compared to nondrinkers  
39  
40 (9:03 h [95%CI: 8:53-9:14 h], 19:27 h [95%CI: 18:50-20:04 h]) (Figure 3D,  
41  
42 eTable1). The subpopulation with admission blood glucose  $\geq$ 140 mg/dl exhibited  
43  
44  
45  
46  
47  
48  
49  
50  
51  
52  
53  
54  
55  
56  
57  
58  
59  
60



1  
2  
3  
4  
5  
6 a circadian pattern of AMI onset with a higher and sharper primary peak and a  
7  
8  
9 less-defined secondary peak compared to the subpopulation of AMI patients with  
10  
11  
12 blood glucose <140 mg/dl on admission (Figure 3E).  
13

### 14 15 16 17 18 **One-year mortality according to onset time of AMI**

19  
20 One-year mortality were compared among four patient subpopulations that were  
21  
22  
23 grouped according to the time range of AMI onset. The baseline characteristics  
24  
25  
26 and laboratory data for the four groups are presented in eTable 3. A total of 753  
27  
28  
29 deaths were recorded during a median follow-up period of 365 days.

30  
31  
32 Kaplan-Meier survival analysis demonstrated that the afternoon-onset  
33  
34  
35 (12:00-17:59 h) group had worse 1-year mortality than the other 3 groups (log  
36  
37  
38 rank test,  $p=0.032$ ) (Figure 4A). Univariable Cox regression analysis revealed  
39  
40  
41 that the HR of one-year mortality in the afternoon-onset group as compared to  
42  
43  
44 the other three groups was 1.20 (95%CI 1.02-1.40,  $p=0.030$ , Figure 4B). This  
45  
46  
47 result did not change after stratification with potential confounding factors that  
48  
49  
50 showed a different trend between the afternoon-onset group and other three  
51  
52  
53 groups (Figure 4B).  
54  
55  
56  
57  
58  
59  
60

## Discussion

In the present study, we confirmed that AMI onset exhibits a circadian pattern characterized by bimodality, with a definite morning peak and a less-defined evening peak. Notably, several lifestyle-related factors were associated with variation in the circadian pattern of AMI onset. In particular, serum TG levels on admission for AMI were associated with a unique pattern of AMI onset that is characterized by augmented unimodal peaks on weekday mornings, suggesting that individual lifestyle may affect the onset pattern of AMI.

### **Bimodal pattern of AMI onset: morning and nighttime peaks**

AMI onset in our large patient cohort generally followed a circadian pattern that was characterized by a high and sharp morning peak and a lower and less-defined sharp nighttime peak (Figure 1), a finding that is consistent with the results of previous investigations.<sup>1-7</sup> Interestingly, the time of two peaks shifted in a synchronous fashion during the weekdays; the secondary peaks generally occurred around 11 to 12 h after the morning on Monday through Friday (Figure 2). For example, AMI onset exhibited early morning and nighttime peaks on

1  
2  
3  
4  
5  
6 Monday and Thursday, whereas that on Tuesday was most frequent in the late  
7  
8 morning and nighttime. Although this finding is partly consistent with the  
9  
10 observation of Peters et al.,<sup>5</sup> who reported that a secondary peak in AMI onset  
11  
12 occurs 11 to 12 h after waking, the present study firstly demonstrated that this  
13  
14 synchrony was present on the weekdays, but absent on the weekends.  
15  
16  
17  
18  
19

20  
21 Several physiological processes are considered to contribute to the  
22  
23 bimodal pattern of AMI onset. For example, Stergiou et al.<sup>12</sup> demonstrated that  
24  
25 the two-peak diurnal variation in stroke onset occurs in parallel with variation in  
26  
27 blood pressure, pulse rate, and physical activity. Thus, the bimodality of blood  
28  
29 pressure and heart rate<sup>13-14</sup> is the most likely explanation for the circadian  
30  
31 patterns of AMI onset observed in the present study. A greater morning surge of  
32  
33 blood pressure and heart rate<sup>13</sup> may explain why the nighttime peak of AMI  
34  
35 onset was lower and less-defined than the morning peak. In addition, increased  
36  
37 blood viscosity<sup>15</sup> and thrombogenicity due to morning hypercoagulability<sup>16</sup> and  
38  
39 hypofibrinolysis<sup>17</sup> also likely increased the frequency of AMI onset in the morning.  
40  
41 It is also possible that external factors, such as physical exertion and mental  
42  
43 stress, could be triggers for the morning onset of AMI.<sup>18</sup> In the present study, the  
44  
45 younger (<65 years old), working, male, and smoker subpopulations had a sharp  
46  
47  
48  
49  
50  
51  
52  
53  
54  
55  
56  
57  
58  
59  
60

1  
2  
3  
4  
5  
6 morning peak of AMI onset compared with the elderly, nonworking, female, and  
7  
8  
9 nonsmoking subpopulations (Figure 3B,C,F,G). The sharpness of the morning  
10  
11  
12 peak might be related to increased susceptibility to physical and mental stresses  
13  
14  
15 in these subpopulations, who are more likely to start activities or go to work soon  
16  
17  
18 after waking up. Similarly, the sharp and early morning peak of AMI onset that  
19  
20  
21 was detected on Monday may be due to the increased physical and mental  
22  
23  
24 stress that is associated with the first morning of the week (Figure 2). We also  
25  
26  
27 found that the morning peak occurred latest on Sunday (Figure 2). Together,  
28  
29  
30 these findings strongly suggest that mental and physical stress may act as a  
31  
32  
33 trigger for the morning onset of AMI.

34  
35 Although many reports have examined the primary peak of AMI onset,  
36  
37  
38 relatively little attention has been paid to the secondary peak. We demonstrated  
39  
40  
41 that drinkers had a higher, sharper, and later nighttime peak of AMI onset than  
42  
43  
44 nondrinkers (Figure 3D). Moreover, the nighttime peak on Saturday was the  
45  
46  
47 highest and sharpest amongst the seven days of the week (Figure 2). This  
48  
49  
50 observation may be explained by the fact that people might be likely to consume  
51  
52  
53 alcohol and engage in social activities on Saturday night in Japan. Thus, these  
54  
55  
56 evening activities can result in increased sympathetic nerve activity and  
57  
58  
59  
60

1  
2  
3  
4  
5  
6 therefore may have contributed to the increased frequency of AMI onset at night.  
7

8  
9 Taken together, our findings suggest that both the morning and nighttime peaks  
10  
11 of AMI onset are influenced by physiological and socioeconomic factors.  
12  
13

### 14 15 16 17 **Impacts of lifestyle-related factors on circadian patterns of AMI onset** 18

19  
20 Most previous studies on circadian pattern of AMI onset have only considered  
21  
22 gender, age, working status as potential factors affecting the circadian patterns  
23  
24 of AMI onset.<sup>1,4-6</sup> Here, we additionally incorporated laboratory data, disease,  
25  
26 and other socioeconomic factors into our analyses and found that several  
27  
28 lifestyle-related factors, including admission serum TG and blood glucose levels,  
29  
30 age, gender, working status, and smoking and drinking habits had statistically  
31  
32 significant influences on the circadian pattern of AMI onset. Among these factors,  
33  
34 elevated serum TG levels ( $\geq 150$  mg/dl) on admission had the largest influence  
35  
36 on AMI onset, as demonstrated by the absence of an evening peak in AMI onset  
37  
38 compared to all other subgroups (Figure 3). Furthermore, the morning peak was  
39  
40 not observed on the weekend in patients with admission TG of  $\geq 150$  mg/dl  
41  
42 (eFigure 1). Fasting hypertriglyceridemia and postprandial hyperlipidemia, which  
43  
44 is characterized by postprandial accumulation of TG-rich lipoproteins and their  
45  
46  
47  
48  
49  
50  
51  
52  
53  
54  
55  
56  
57  
58  
59  
60

1  
2  
3  
4  
5  
6 partially hydrolyzed products, are both closely related to the development of  
7  
8 atherosclerotic cardiovascular diseases.<sup>19-21</sup> Several studies have also reported  
9  
10 that elevated serum TG levels are associated with an increased risk of  
11  
12 myocardial infarction.<sup>22-23</sup> To our knowledge, however, this is the first study  
13  
14 demonstrating an association between serum TG levels on admission and  
15  
16 circadian patterns of AMI onset. Although LDL/HDL levels are considered to be  
17  
18 closely associated with the development of atherosclerosis, LDL/HDL levels  
19  
20 were not associated with onset patterns of AMI in the present study. Thus, these  
21  
22 findings suggest for the first time that TG may strongly influence the circadian  
23  
24 patterns of AMI onset.  
25  
26  
27  
28  
29  
30  
31  
32  
33  
34

35 Hypertriglyceridemia is associated with increased thrombogenicity,<sup>24-25</sup>  
36  
37 which is reportedly associated with increased plasminogen activator inhibitor-1  
38  
39 (PAI-1)<sup>26-28</sup> and factor VII coagulant activities,<sup>29-30</sup> and viscosity.<sup>31</sup> These three  
40  
41 factors have also been reported to affect the development of MI.<sup>32-34</sup> Moreover,  
42  
43 hypertriglyceridemia is also related to endothelium dysfunction,<sup>35-36</sup> which  
44  
45 contributes to the pathogenesis of coronary artery disease.<sup>37</sup> In healthy subjects,  
46  
47 serum TG levels also exhibit circadian variation with a peak around 3 AM.<sup>38</sup> Thus,  
48  
49 it is conceivable that patients with hypertriglyceridemia have further augmented TG  
50  
51  
52  
53  
54  
55  
56  
57  
58  
59  
60

1  
2  
3  
4  
5  
6 levels and are therefore exposed to increased thrombogenicity and endothelium  
7  
8  
9 dysfunction in the early morning hours before dawn, which may explain the  
10  
11 accentuated morning peak of AMI onset in patients with admission TG  $\geq 150$   
12  
13 mg/dl. In addition, it is reported that high plasma PAI-1 levels and excessive  
14  
15 surges in morning blood pressure are independently and additively associated  
16  
17 with increased risk of stroke in older hypertensive patients,<sup>39</sup> supporting our  
18  
19 observation of a higher morning risk of AMI onset in the subpopulation with  
20  
21 admission hypertriglyceridemia.  
22  
23  
24  
25  
26  
27  
28

29 Our subpopulation analyses also revealed that the circadian patterns of  
30  
31 AMI onset in patients with admission TG levels of  $\geq 150$  mg/dl had a sharp  
32  
33 morning peak during weekdays, whereas no such peak was detected on  
34  
35 Saturday or Sunday. This observation strongly suggests that increased  
36  
37 thrombogenicity and endothelium dysfunction was a factor, but not the trigger,  
38  
39 for the morning onset of AMI in our study cohort. Thus, we speculate that the  
40  
41 accentuated morning peak of AMI onset in patients with admission TG  $\geq 150$   
42  
43 mg/dl may be due to the combination of the following three factors: 1) increased  
44  
45 hypercoagulability, hypofibrinolysis, viscosity, and endothelium dysfunction  
46  
47 resulting from elevated serum TG levels, 2) increased risk of a morning surge of  
48  
49  
50  
51  
52  
53  
54  
55  
56  
57  
58  
59  
60

1  
2  
3  
4  
5  
6 blood pressure and heart rate, and 3) mental and physical stresses.  
7  
8  
9

### 10 11 12 **One-year mortality according to AMI onset time** 13

14 In the present study, patients with an afternoon onset of AMI had the worst  
15 one-year mortality. Bae et al.<sup>40</sup> reported that patients with evening-onset AMI had  
16 the worst one-year mortality in association with poor baseline clinical  
17 characteristics. However, the baseline clinical characteristics were comparable  
18 among the four onset-time groups in our study cohort. Moreover, even after  
19 stratification for potential confounding variables, the results did not change,  
20 suggesting that the increased prognostic risk of AMI in the afternoon-onset  
21 group was not simply explained by differences in baseline characteristics.  
22  
23  
24  
25  
26  
27  
28  
29  
30  
31  
32  
33  
34  
35  
36  
37  
38  
39  
40

### 41 **Limitations** 42

43 A few limitations of the present study warrant mention. First, this was an analysis  
44 of prospective observational study and the results may have therefore been  
45 influenced by potential confounding factors, even after adjustment for baseline  
46 clinical and angiographic characteristics. Thus, caution is needed when  
47 interpreting the data and making generalizations to other cohorts. Second, the  
48  
49  
50  
51  
52  
53  
54  
55  
56  
57  
58  
59  
60



laboratory findings, including serum TG levels, were evaluated on admission. Therefore, we could not exclude the influence of food consumption, making interpretation of the data difficult. However, our results also demonstrated that serum TG levels were not likely the final trigger for AMI onset, as patients with TG  $\geq 150$  mg/dl on admission did not exhibit a morning peak of AMI onset on the weekend. In patients with hypertriglycemia, hypercoagulability, hypofibrinolysis, viscosity and endothelium dysfunction are generally increased during the early morning hours before dawn,<sup>26-31,35-36,38</sup> resulting in enhanced susceptibility to AMI onset. Thus, under such conditions, it is conceivable that increased sympathetic activity, which was further enhanced in association with mental, physical, and/or other factors, could be the final trigger for AMI onset on weekday mornings in patients with TG  $\geq 150$  mg/dl on admission. Based on these findings, the influence of meal intake on the morning peak of AMI onset in the population with TG  $\geq 150$  mg/dl may be minimal, if not negligible.

## Conclusions

In our large cohort of consecutive AMI patients, the circadian pattern of AMI onset exhibited bimodality and was shown to be influenced by several

1  
2  
3  
4  
5  
6 lifestyle-related factors. Among these factors, increased serum TG levels on  
7  
8  
9 admission had the most marked affect on circadian variation, which was  
10  
11  
12 characterized by an increased morning risk of AMI onset during weekdays in this  
13  
14  
15 subpopulation. Although confirmation in other cohorts is required, this finding  
16  
17  
18 may help to identify the underlying triggers and substrates of AMI onset and help  
19  
20  
21 suggest preventive measures of AMI.  
22  
23  
24  
25

### 26 **Author affiliations**

27  
28  
29 1: Department of Cardiovascular Medicine, Osaka University Graduate School of  
30  
31  
32 Medicine, Suita, Japan  
33

34  
35 2: Department of Biomedical Statistics, Osaka University Graduate School of  
36  
37  
38 Medicine, Suita, Japan  
39

40  
41 3: Department of Advanced Cardiovascular Therapeutics, Osaka University  
42  
43  
44 Graduate School of Medicine, Suita, Japan  
45

46  
47 4: Department of Cardiovascular Medicine, Tohoku University Graduate School  
48  
49  
50 of Medicine, Sendai, Japan  
51

52  
53 5: Department of Social and Environmental Medicine, Osaka University  
54  
55  
56 Graduate School of Medicine, Suita, Japan  
57  
58  
59  
60

1  
2  
3  
4  
5  
6: School of Human Welfare Studies Health Care Center and Clinic, Kwansei  
7  
8  
9 Gakuin University, Nishinomiya, Japan

10  
11  
12 7: Department of Community Medicine, Osaka University Graduate School of  
13  
14  
15 Medicine, Suita, Japan

16  
17  
18 8: Osaka Prefectural Hospital Organization Osaka Medical Center for Cancer  
19  
20  
21 and Cardiovascular Diseases, Osaka, Japan

22  
23  
24 9: Department of Cardiovascular Medicine, University of Tokyo Graduate School  
25  
26  
27 of Medicine, Tokyo, Japan

### 28 29 **Contributors**

30  
31  
32 RE and YKS (Yasuhiko Sakata) participated in study concept and design. DN,  
33  
34  
35 SS, MU, SM and MH participated in acquisition of data. RE, YKS, SY and TH  
36  
37  
38 participated in analysis and interpretation of the data. YKS, TK, HS, SH, YSS  
39  
40  
41 (Yasushi Sakata), SY, MH and TH participated in drafting and critical revision of  
42  
43  
44 the manuscript for important intellectual content. RE and TH participated in  
45  
46  
47 statistical analysis. YKS, HS, SN, MH and IK obtained funding.

### 48 49 **Funding**

50  
51  
52 This work was supported by Grants-in-Aid for University and Society  
53  
54  
55 Collaboration (#19590816 and #19390215) from the Japanese Ministry of  
56  
57  
58

1  
2  
3  
4  
5  
6 Education, Culture, Sports, Science and Technology, Tokyo, Japan.  
7

8  
9 **Competing interests**

10  
11 Dr. Komuro has received research grants and speaker's fees from Takeda  
12  
13 Pharmaceutical Company, Astellas Pharma, DAIICHI SANKYO COMPANY,  
14  
15 Boehringer Ingelheim, Novartis Pharma and Shionogi. No other authors have  
16  
17 relationships with industry to disclose or financial associations that might pose a  
18  
19 conflict of interest in connection with the submitted article.  
20  
21  
22  
23  
24

25  
26 **Patient consent**

27  
28  
29 Obtained.  
30  
31

32 **Ethics approval**

33  
34  
35 The study protocol has been approved by the ethics committee of each  
36  
37 participating hospital.  
38  
39

40  
41 **Acknowledgements**

42  
43 We thank Mariko Kishida, Rie Nagai, Nanase Muraoka, Hiroko Takemori, Akiko  
44  
45 Yamagishi, Kumiko Miyoshi, Chizuru Hamaguchi, Hiroko Machida, Mariko  
46  
47 Yoneda, Nagisa Yoshioka, Mayuko Tomatsu, Kyoko Tatsumi, Tomoko Mizuoka,  
48  
49 Shigemi Kohara, Junko Tsugawa, Junko Isotani, Sachiko Ashibe, and all other  
50  
51 OACIS research coordinators and nurses for their excellent assistance with data  
52  
53  
54  
55  
56  
57  
58  
59  
60

1  
2  
3  
4  
5  
6 collection.

7  
8 **Appendix**

9  
10 The OACIS Investigators

11  
12 Chair: Issei Komuro, Department of Cardiovascular Medicine, Osaka University

13  
14 Graduate School of Medicine, 2-2 Yamada-oka, Suita 565-0871, Japan

15  
16 Secretariats: Yasuhiko Sakata (Chief), Daisaku Nakatani, Shinichiro Suna,

17  
18 Masaya Usami, Sen Matsumoto, Masahiko Hara, Mariko Kishida, Rie Nagai:

19  
20 Department of Cardiovascular Medicine, Osaka University Graduate School of

21  
22 Medicine, Suita, Japan

23  
24 Investigators (institutions listed in alphabetical order):

25  
26 Yoshiyuki Kijima, Yusuke Nakagawa, Minoru Ichikawa, Higashi-Osaka City

27  
28 General Hospital, Higashi-Osaka, Japan; Young-Jae Lim, Shigeo Kawano,

29  
30 Kawachi General Hospital, Higashi-Osaka, Japan; Hiroshi Sato, Kwasnsei

31  
32 Gakuin University, Nishinomiya, Japan; Takashi Shimazu, Hisakazu Fuji,

33  
34 Kazuhiro Aoki, Kobe Ekisaikai Hospital, Kobe, Japan; Seiki Nagata, Yoshio

35  
36 Ishida, Masaaki Uematsu, Tetsuya Watanabe, Masashi Fujita, Masaki Awata,

37  
38 Kansai Rosai Hospital, Amagasaki, Japan; Michio Sugii, Meiwa Hospital,

39  
40 Nishinomiya, Japan; Masatake Fukunami, Takahisa Yamada, Takashi Morita,

1  
2  
3  
4  
5  
6 Osaka General Medical Center, Osaka, Japan; Shinji Hasegawa, Nobuyuki  
7  
8  
9 Ogasawara, Osaka Kosei Nenkin Hospital, Osaka, Japan; Tatsuya Sasaki,  
10  
11  
12 Yoshinori Yasuoka, Osaka Minami Medical Center, National Hospital  
13  
14  
15 Organization, Kawachinagano, Japan; Hideo Kusuoka, Yukihiro Koretsune,  
16  
17  
18 Yoshio Yasumura, Keiji Hirooka, Osaka Medical Center, National Hospital  
19  
20  
21 Organization, Osaka, Japan; Masatsugu Hori (previous Chair), Osaka  
22  
23  
24 Prefectural Hospital Organization Osaka Medical Center for Cancer and  
25  
26  
27 Cardiovascular Diseases; Kazuhisa Kodama, Yasunori Ueda, Kazunori  
28  
29  
30 Kashiwase, Akio Hirata, Mayu Nishio, Mitsutoshi Asai, Osaka Police Hospital,  
31  
32  
33 Osaka, Japan; Yoshio Yamada, Jun Tanouchi, Masami Nishino, Hiroyasu Kato,  
34  
35  
36 Ryu Shutta, Osaka Rosai Hospital, Sakai, Japan; Shintaro Beppu, Akio Kohama,  
37  
38  
39 Hiroyoshi Yamamoto, Osaka Seamens Insurance Hospital, Osaka, Japan; Issei  
40  
41  
42 Komuro, Shinsuke Nanto, Kinya Otsu, Yasushi Matsumura, Kazuhiro Yamamoto,  
43  
44  
45 Tetsuo Minamino, Satoru Sumitsuji, Yasuhiko Sakata, Shungo Hikoso, Daisaku  
46  
47  
48 Nakatani, Osaka University Graduate School of Medicine, Suita, Japan; Toru  
49  
50  
51 Hayashi, Yasuji Doi, Ken-ichiro Okada, Noritoshi Ito, Saiseikai Senri Hospital,  
52  
53  
54 Suita, Japan; Kenshi Fujii, Katsuomi Iwakura, Atsushi Okamura, Motoo Date,  
55  
56  
57 Yoshiharu Higuchi, Sakurabashi Watanabe Hospital, Osaka, Japan; Noriyuki  
58  
59  
60

1  
2  
3  
4  
5  
6 Akehi, Settsu Iseikai Hospital, Settsu, Japan; Eiji Hishida, Teramoto Memorial  
7  
8  
9 Hospital, Kawachinagano, Japan; and Shiro Hoshida, Kazuhiko Hashimura,  
10  
11  
12 Takayoshi Adachi, Yao Municipal Hospital, Yao, Japan.  
13  
14  
15  
16  
17  
18  
19  
20  
21  
22  
23  
24  
25  
26  
27  
28  
29  
30  
31  
32  
33  
34  
35  
36  
37  
38  
39  
40  
41  
42  
43  
44  
45  
46  
47  
48  
49  
50  
51  
52  
53  
54  
55  
56  
57  
58  
59  
60

For peer review only

### Sources of funding

This work was supported by Grants-in-Aid for University and Society Collaboration (#19590816 and #19390215) from the Japanese Ministry of Education, Culture, Sports, Science and Technology, Tokyo, Japan.

### Contributorship Statement

RE and YKS (Yasuhiko Sakata) participated in study concept and design. DN, SS, MU, SM and MH participated in acquisition of data. RE, YKS, SY and TH participated in analysis and interpretation of the data. YKS, TK, HS, SH, YSS (Yasushi Sakata), SY, MH and TH participated in drafting and critical revision of the manuscript for important intellectual content. RE and TH participated in statistical analysis. YKS, HS, SN, MH and IK obtained funding.

### Disclosure

Dr. Komuro has received research grants and speaker's fees from Takeda Pharmaceutical Company, Astellas Pharma, DAIICHI SANKYO COMPANY, Boehringer Ingelheim, Novartis Pharma and Shionogi. No other authors have relationships with industry to disclose or financial associations that might pose a conflict of interest in connection with the submitted article.



## Data Sharing Statement

All OACIS investigators can access to the published and unpublished data.

## References

1. Muller JE, Stone PH, Turi ZG, et al. Circadian Variation in the Frequency of Onset of Acute Myocardial Infarction. *N Engl J Med.* 1985;313:1315-22.
2. Mahmoud KD, Lennon RJ, Ting HH, Rihal CS, Holmes DR Jr. Circadian variation in coronary stent thrombosis. *JACC Cardiovasc Interv.* 2011;4:183-90.
3. Muller JE, Tofler GH, Stone PH. Circadian variation and triggers of onset of acute cardiovascular disease. *Circulation.* 1989;79:733-43.
4. Kinjo K, Sato H, Sato H, et al; Osaka Acute Coronary Insufficiency Study (OACIS) Group. Circadian variation of the onset of acute myocardial infarction in the Osaka area, 1998-1999: characterization of morning and nighttime peaks. *Jpn Circ J.* 2001;65:617-20.

- 1  
2  
3  
4  
5  
6 5. Peters RW, Zoble RG, Liebson PR, Pawitan Y, Brooks MM, Proschan M.  
7  
8  
9 Identification of a secondary peak in myocardial infarction onset 11 to 12 hours  
10  
11 after awakening: the Cardiac Arrhythmia Suppression Trial (CAST) experience. J  
12  
13 Am Coll Cardiol. 1993;22:998-1003.  
14  
15  
16  
17  
18  
19  
20 6. Itaya H, Takagi T, Sugi K, Nakamura M. Contents of second peak in the  
21  
22 circadian variation of acute myocardial infarction in the Japanese population. J  
23  
24 Cardiol. 2012;59:147-53.  
25  
26  
27  
28  
29  
30  
31  
32 7. Tsukada T, Ikeda T, Ishiguro H, et al. Circadian variation in out-of-hospital  
33  
34 cardiac arrests due to cardiac cause in a Japanese patient population. Circ J.  
35  
36 2010;74:1880-7.  
37  
38  
39  
40  
41  
42  
43 8. Willich SN, Löwel H, Lewis M, Hörmann A, Arntz HR, Keil U. Weekly variation  
44  
45 of acute myocardial infarction. Increased Monday risk in the working population.  
46  
47 Circulation. 1994;90:87-93.  
48  
49  
50  
51  
52  
53  
54  
55 9. Hara M, Sakata Y, Nakatani D, et al; Osaka Acute Coronary Insufficiency  
56  
57  
58  
59  
60

1  
2  
3  
4  
5  
6 Study (OACIS) Investigators. Low levels of serum n-3 polyunsaturated fatty  
7  
8 acids are associated with worse heart failure-free survival in patients after acute  
9  
10 myocardial infarction. *Circ J*. 2013;1:153-162.  
11  
12

13  
14  
15  
16  
17 10. Nakatani D, Sakata Y, Suna S, et al; Osaka Acute Coronary Insufficiency  
18  
19 Study (OACIS) Investigators. Impact of beta blockade therapy on long-term  
20  
21 mortality after ST-segment elevation acute myocardial infarction in the  
22  
23 percutaneous coronary intervention era. *Am J Cardiol*. 2013;111:457-464.  
24  
25  
26  
27

28  
29  
30  
31  
32 11. Gao F, Chia KS, Krantz I, Nordin P, Machin D. On the application of the von  
33  
34 Mises distribution and angular regression methods to investigate the seasonality  
35  
36 of disease onset. *Stat Med*. 2006;25:1593-618.  
37  
38  
39

40  
41  
42  
43 12. Stergiou GS, Vemmos KN, Pliarchopoulou KM, Synetos AG, Roussias LG,  
44  
45 Mountokalakis TD. Parallel morning and evening surge in stroke onset, blood  
46  
47 pressure, and physical activity. *Stroke*. 2002;33:1480-6.  
48  
49  
50

51  
52  
53  
54  
55 13. Degaute JP, van de Borne P, Linkowski P, Van Cauter E. Quantitative  
56  
57  
58

1  
2  
3  
4  
5  
6 analysis of the 24-hour blood pressure and heart rate patterns in young men.  
7  
8

9 Hypertension. 1991;18:199-210.  
10  
11  
12  
13

14 14. Kotsis V, Stabouli S, Bouldin M, Low A, Toumanidis S, Zakopoulos N. Impact  
15  
16 of obesity on 24-hour ambulatory blood pressure and hypertension.  
17  
18  
19

20 Hypertension. 2005;45:602-7.  
21  
22  
23  
24  
25

26 15. Thrall G, Lane D, Carroll D, Lip GY. A systematic review of the prothrombotic  
27  
28 effects of an acute change in posture: a possible mechanism underlying the  
29  
30 morning excess in cardiovascular events? Chest. 2007;132:1337-47.  
31  
32  
33  
34  
35  
36  
37

38 16. Tofler GH, Brezinski D, Schafer AI, et al. Concurrent morning increase in  
39  
40 platelet aggregability and the risk of myocardial infarction and sudden cardiac  
41  
42 death. N Engl J Med. 1987;316:1514-8.  
43  
44  
45  
46  
47  
48

49 17. Andreotti F, Davies GJ, Hackett DR, et al. Major circadian fluctuations in  
50  
51 fibrinolytic factors and possible relevance to time of onset of myocardial  
52  
53 infarction, sudden cardiac death and stroke. Am J Cardiol. 1988;62:635-7.  
54  
55  
56  
57  
58  
59  
60

- 1  
2  
3  
4  
5  
6  
7  
8  
9 18. Tofler GH, Muller JE. Triggering of acute cardiovascular disease and  
10  
11 potential preventive strategies. *Circulation*. 2006;114:1863-72.  
12  
13  
14  
15  
16  
17  
18 19. Hokanson JE, Austin MA. Plasma triglyceride level is a risk factor for  
19  
20 cardiovascular disease independent of high-density lipoprotein cholesterol level:  
21  
22 a meta-analysis of population-based prospective studies. *J Cardiovasc Risk*.  
23  
24  
25  
26 1996;3:213-9.  
27  
28  
29  
30  
31  
32 20. Iso H, Naito Y, Sato S, et al. Serum triglycerides and risk of coronary heart  
33  
34 disease among Japanese men and women. *Am J Epidemiol*. 2001;153:490-9.  
35  
36  
37  
38  
39  
40  
41 21. Masuda D, Sugimoto T, Tsujii K, et al. Correlation of fasting serum  
42  
43 apolipoprotein B-48 with coronary artery disease prevalence. *Eur J Clin Invest*.  
44  
45  
46 2012;42:992-9.  
47  
48  
49  
50  
51  
52 22. Stampfer MJ, Krauss RM, Ma J, et al. A prospective study of triglyceride level,  
53  
54  
55 low-density lipoprotein particle diameter, and risk of myocardial infarction. *JAMA*.  
56  
57  
58  
59  
60

1  
2  
3  
4  
5  
6 1996;276:882-8.  
7  
8  
9

10  
11 23. Nordestgaard BG, Benn M, Schnohr P, Tybjaerg-Hansen A. Nonfasting  
12 triglycerides and risk of myocardial infarction, ischemic heart disease, and death  
13 in men and women. JAMA. 2007;298:299-308.  
14  
15  
16  
17  
18  
19

20  
21 24. No authors listed. Hypertriglyceridaemia and vascular risk. Report of a  
22 meeting of physicians and scientists, University College London Medical School.  
23 Lancet. 1993;342:781-7.  
24  
25  
26  
27  
28  
29  
30  
31

32  
33 25. Rosenson RS, Lowe GD. Effects of lipids and lipoproteins on thrombosis and  
34 rheology. Atherosclerosis. 1998;140:271-80.  
35  
36  
37  
38  
39  
40  
41

42  
43 26. Hamsten A, Wiman B, de Faire U, Blombäck M. Increased plasma levels of a  
44 rapid inhibitor of tissue plasminogen activator in young survivors of myocardial  
45 infarction. N Engl J Med. 1985;313:1557-63.  
46  
47  
48  
49  
50  
51

52  
53  
54  
55 27. Mehta J, Mehta P, Lawson D, Saldeen T. Plasma tissue plasminogen  
56  
57  
58  
59  
60

1  
2  
3  
4  
5  
6 activator inhibitor levels in coronary artery disease: correlation with age and  
7  
8  
9 serum triglyceride concentrations. *J Am Coll Cardiol.* 1987;9:263-8.  
10

11  
12  
13  
14 28. Eriksson P, Nilsson L, Karpe F, Hamsten A. Very-low-density lipoprotein  
15  
16  
17 response element in the promoter region of the human plasminogen activator  
18  
19  
20 inhibitor-1 gene implicated in the impaired fibrinolysis of hypertriglyceridemia.  
21  
22  
23 *Arterioscler Thromb Vasc Biol.* 1998;18:20-6.  
24

25  
26  
27  
28  
29 29. Mitropoulos KA, Miller GJ, Reeves BE, Wilkes HC, Cruickshank JK. Factor  
30  
31  
32 VII coagulant activity is strongly associated with the plasma concentration of  
33  
34  
35 large lipoprotein particles in middle-aged men. *Atherosclerosis.* 1989;76:203-8.  
36

37  
38  
39  
40  
41 30. Bruckert E, Carvalho de Sousa J, Giral P, et al. Interrelationship of plasma  
42  
43  
44 triglyceride and coagulant factor VII levels in normotriglyceridemic  
45  
46  
47 hypercholesterolemia. *Atherosclerosis.* 1989;75:129-34.  
48

49  
50  
51  
52 31. Rosenson RS, Shott S, Tangney CC. Hypertriglyceridemia is associated with  
53  
54  
55 an elevated blood viscosity Rosenson: triglycerides and blood viscosity.  
56  
57

1  
2  
3  
4  
5  
6 Atherosclerosis. 2002;161:433-9.  
7  
8  
9

10  
11  
12 32. Hamsten A, de Faire U, Walldius G, et al. Plasminogen activator inhibitor in  
13  
14 plasma: risk factor for recurrent myocardial infarction. Lancet. 1987;2:3-9.  
15  
16  
17

18  
19  
20 33. Meade TW, Mellows S, Brozovic M, et al. Haemostatic function and  
21  
22 ischaemic heart disease: principal results of the Northwick Park Heart Study.  
23  
24  
25  
26 Lancet. 1986;2:533-7.  
27  
28

29  
30  
31  
32 34. Lowe GD, Lee AJ, Rumley A, Price JF, Fowkes FG. Blood viscosity and risk  
33  
34 of cardiovascular events: the Edinburgh Artery Study. Br J Haematol.  
35  
36  
37  
38 1997;96:168-73.  
39  
40

41  
42  
43 35. Lundman P, Eriksson M, Schenck-Gustafsson K, Karpe F, Tornvall P.  
44  
45  
46 Transient triglyceridemia decreases vascular reactivity in young, healthy men  
47  
48  
49 without risk factors for coronary heart disease. Circulation. 1997;96:3266-8.  
50  
51

52  
53  
54  
55 36. Kugiyama K, Doi H, Motoyama T, et al. Association of remnant lipoprotein  
56  
57  
58



1  
2  
3  
4  
5  
6 levels with impairment of endothelium-dependent vasomotor function in human  
7  
8  
9 coronary arteries. *Circulation*. 1998;97:2519-26.

10  
11  
12  
13  
14 37. Zeiher AM, Drexler H, Saurbier B, Just H. Endothelium-mediated coronary  
15  
16 blood flow modulation in humans. Effects of age, atherosclerosis,  
17  
18 hypercholesterolemia, and hypertension. *J Clin Invest*. 1993;92:652-62.  
19  
20  
21  
22  
23

24  
25  
26 38. Rivera-Coll A, Fuentes-Arderiu X, Díez-Noguera A. Circadian rhythmic  
27  
28 variations in serum concentrations of clinically important lipids. *Clin Chem*.  
29  
30 1994;40:1549-53.  
31  
32  
33  
34  
35  
36  
37

38 39. Kario K, Yano Y, Matsuo T, Hoshide S, Eguchi K, Shimada K. Additional  
39  
40 impact of morning haemostatic risk factors and morning blood pressure surge on  
41  
42 stroke risk in older Japanese hypertensive patients. *Eur Heart J*.  
43  
44 2011;32:574-80.  
45  
46  
47  
48  
49  
50  
51

52 40. Bae MH, Ryu HM, Lee JH, et al. The impact of circadian variation on  
53  
54 12-month mortality in patients with acute myocardial infarction. *Korean Circ J*.  
55  
56  
57  
58  
59  
60

2010;40:616-24.

**Table 1.** Demographics and clinical characteristics of the study population

|                                     | N=7755           |
|-------------------------------------|------------------|
| <b>Patients</b>                     |                  |
| Age (years)                         | 66 (57-74)       |
| Male (%)                            | 5872 (75.7)      |
| Job (%)                             | 3364 (48.2)      |
| BMI (kg/m <sup>2</sup> )            | 23.4 (21.4-25.7) |
| <b>Cardiovascular risk factors</b>  |                  |
| Smoker (%)                          | 4865 (63.9)      |
| Drinker (%)                         | 3321 (45.3)      |
| Diabetes (%)                        | 2586 (33.4)      |
| Hypertension (%)                    | 4424 (58.9)      |
| Dyslipidemia (%)                    | 3259 (44.1)      |
| Previous MI (%)                     | 983 (13.0)       |
| Angina pectoris (%)                 | 1737 (23.4)      |
| Multivessel disease (%)             | 2790 (38.4)      |
| Collateral circulation (%)          | 2576 (35.7)      |
| <b>Clinical presentation</b>        |                  |
| Onset admission time <24h (%)       | 6804 (89.1)      |
| Killip ≥ II (%)                     | 1331 (18.0)      |
| Initial TIMI ≤ II (%)               | 4759 (68.4)      |
| STEMI (%)                           | 6567 (86.0)      |
| <b>Laboratory data on admission</b> |                  |
| Blood glucose level (mg/dl)         | 152 (122-209)    |
| HDL cholesterol (mg/dl)             | 44 (37-53)       |
| LDL cholesterol (mg/dl)             | 121 (99-147)     |
| Triglycerides (mg/dl)               | 92 (58-142)      |
| HbA1c (%)                           | 5.9 (5.5-6.9)    |
| Peak CK (IU/l)                      | 2147 (1069-4006) |
| eGFR (ml/min/1.73 m <sup>2</sup> )  | 64.5 (49.2-80.9) |

## Localization of MI

|     |             |
|-----|-------------|
| LAD | 3050 (41.7) |
| RCA | 2447 (33.4) |
| LCX | 998 (13.6)  |
| LMT | 164 (2.2)   |

---

BMI = body mass index; MI = myocardial infarction; STEMI = ST-elevation myocardial infarction; HDL = high density lipoprotein; LDL = low density lipoprotein; TG = triglyceride ; HbA1c = hemoglobin A1c; CK = creatinine phosphokinase; eGFR = estimated glomerular filtration rate; LAD = left anterior descending artery; LCX = left circumflex artery; LMT = left main trunk; RCA = right coronary artery. Categorical variables are presented as number (percentage), and continuous variables are presented as quartile. Laboratory data were measured on admission. Smoker was defined as patients with smoking history, and drinker was defined as active drinker. Number (percentage) of Localization of MI was calculated out of 7319 patients who underwent coronary angiography.

## Figure legends

### Figure 1. Circadian pattern of AMI onset in the overall population.

A circadian pattern of AMI onset in the overall population was clearly observed in a circular plot (A) and histogram (B). The solid line corresponds to the fitted von Mises distribution, and the dots with error bars are the estimated peak onset times and 95% confidence intervals (CI), respectively.

### Figure 2. Circadian pattern of AMI onset according to day of the week.

Circadian patterns of AMI onset based on the day of the week are shown. The estimated peak onset time and 95% CIs are shown below each circular plot.

\* P values from the likelihood ratio (LR) test to examine whether the circadian pattern of AMI onset was uniform, unimodal, or bimodal.

### Figure 3. Circadian pattern of AMI onset based on lifestyle-related factors.

(A) Circular plots of the circadian pattern of AMI onset in the subpopulation with TG levels  $\geq 150$  and  $< 150$  mg/dl, and the circular plot of the corresponding fitted von Mises distributions for each subgroup are shown. (B)-(M) Circular plots of

1  
2  
3  
4  
5  
6 the fitted von Mises distributions of each subgroup based on smoking habit, age,  
7  
8  
9 drinking habit, BG levels, gender, and working status, LDL levels, HDL levels,  
10  
11  
12 Hba1c levels, Hypertension, Diabetes and Dyslipidemia.

13  
14  
15 \* P values from the LR test to examine whether the circadian pattern of AMI  
16  
17  
18 onset was uniform, unimodal, or bimodal in each subgroup.

19  
20  
21 † P values from the hierarchical LR test to examine whether each factor affected  
22  
23  
24 the circadian pattern of AMI onset.

25  
26  
27  
28  
29 **Figure 4 . One-year mortality according to the onset time of AMI onset**

30  
31  
32 **(A) One-year mortality among the four subgroups based on AMI onset time.**

33  
34  
35 **(B) Hazard ratios (HRs) for one-year mortality in the afternoon-onset group**  
36  
37  
38 **versus the other three onset-time groups.**

39  
40  
41 Kaplan-Meier survival curves of one-year mortality among the four AMI onset  
42  
43  
44 time subgroups (A). A p value from the log-rank test was used to examine  
45  
46  
47 difference in the Kaplan-Meier curves. HR and 95%CI, and p value for the  
48  
49  
50 overall population was calculated using univariable Cox regression analysis. The  
51  
52  
53 HRs and 95%CI, and p values for the individual potential confounding variables  
54  
55  
56 were calculated using stratified Cox regression analysis, in which the variables  
57  
58  
59  
60

1  
2  
3  
4  
5  
6 were included into the model as stratification factors (B).  
7  
8  
9

10  
11 **eFigure 1. Circadian pattern of AMI onset according to day of the week in**  
12 **the subpopulation with admission serum TG  $\geq 150$  and  $< 150$  mg/dl.**  
13  
14

15  
16  
17 Circular plots of the fitted von Mises distributions for the subpopulation with  
18 admission serum TG  $\geq 150$  and  $< 150$  mg/dl according to the day of the week are  
19  
20  
21 shown.  
22  
23  
24

25  
26 \* P values from the LR test to examine whether the circadian pattern of AMI  
27  
28 onset was uniform, unimodal, or bimodal in each subgroup.  
29  
30  
31  
32  
33  
34  
35  
36  
37  
38  
39  
40  
41  
42  
43  
44  
45  
46  
47  
48  
49  
50  
51  
52  
53  
54  
55  
56  
57  
58  
59  
60

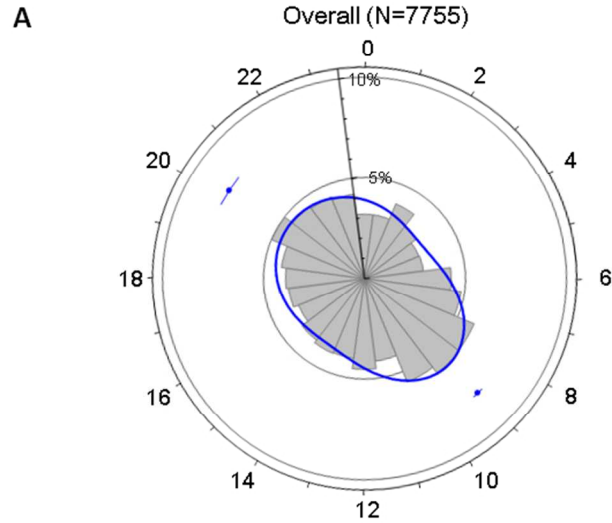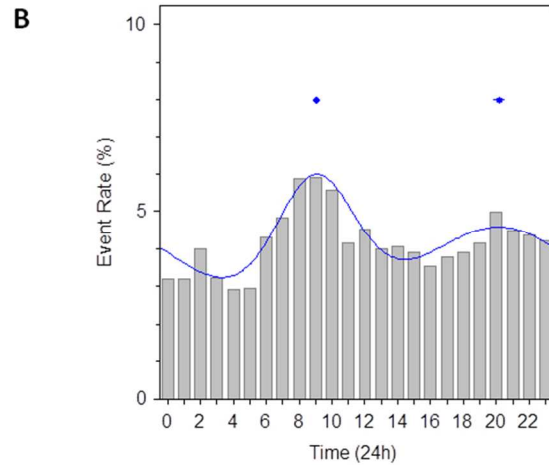

**Estimated peaks of AMI onset**  
 9:01 h ( 95%CI: 8:53-9:08 h)  
 20:11 h ( 95%CI: 19:48-20:34 h)

A circadian pattern of AMI onset in the overall population was clearly observed in a circular plot (A) and histogram (B). The solid line corresponds to the fitted von Mises distribution, and the dots with error bars are the estimated peak onset times and 95% confidence intervals (CI), respectively.  
 190x275mm (96 x 96 DPI)

1  
2  
3  
4  
5  
6  
7  
8  
9  
10  
11  
12  
13  
14  
15  
16  
17  
18  
19  
20  
21  
22  
23  
24  
25  
26  
27  
28  
29  
30  
31  
32  
33  
34  
35  
36  
37  
38  
39  
40  
41  
42  
43  
44  
45  
46  
47  
48  
49  
50  
51  
52  
53  
54  
55  
56  
57  
58  
59  
60

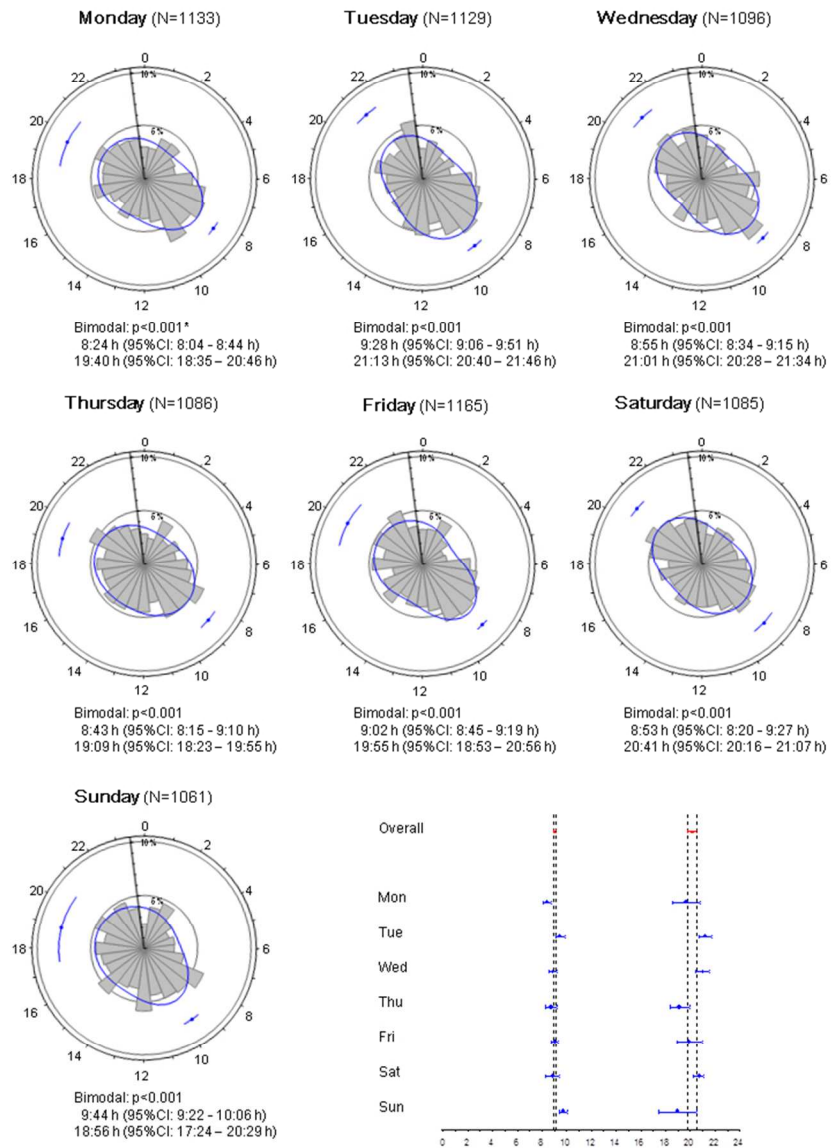

Circadian patterns of AMI onset based on the day of the week are shown. The estimated peak onset time and 95% CIs are shown below each circular plot.

\* P values from the likelihood ratio (LR) test to examine whether the circadian pattern of AMI onset was uniform, unimodal, or bimodal.

190x275mm (96 x 96 DPI)



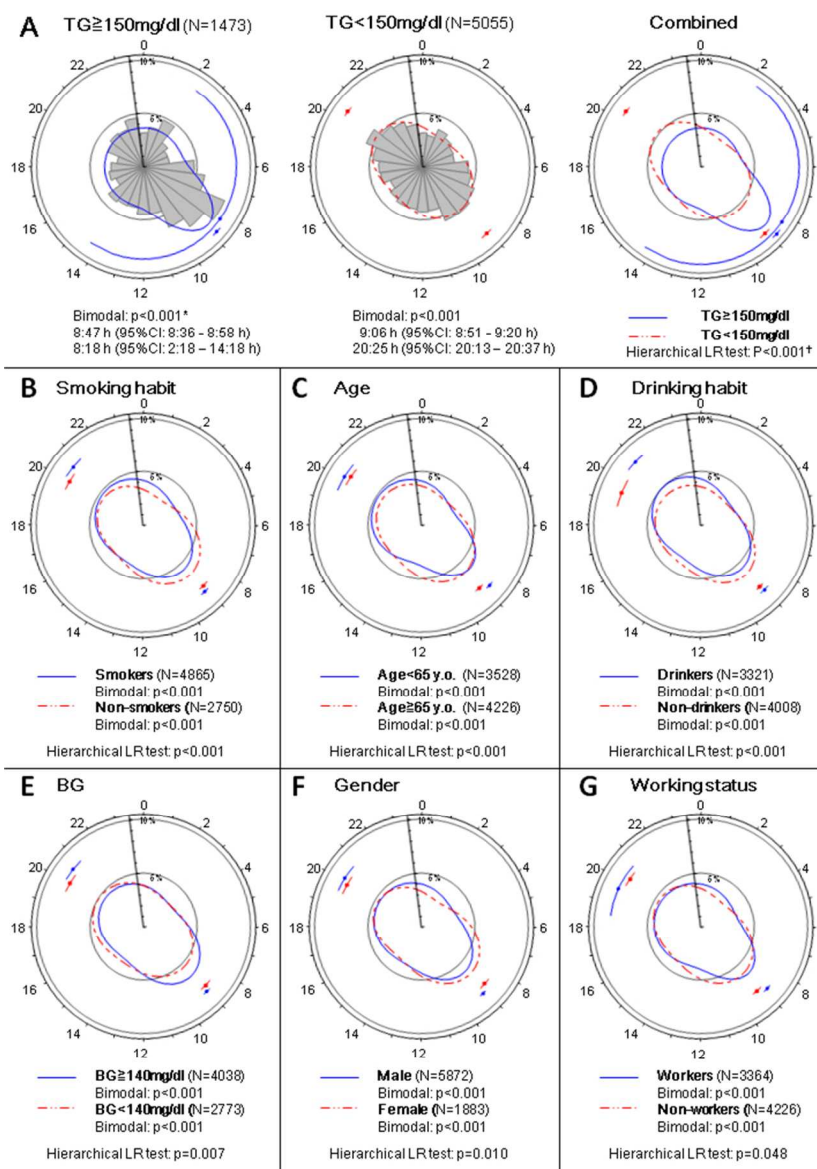

190x275mm (96 x 96 DPI)

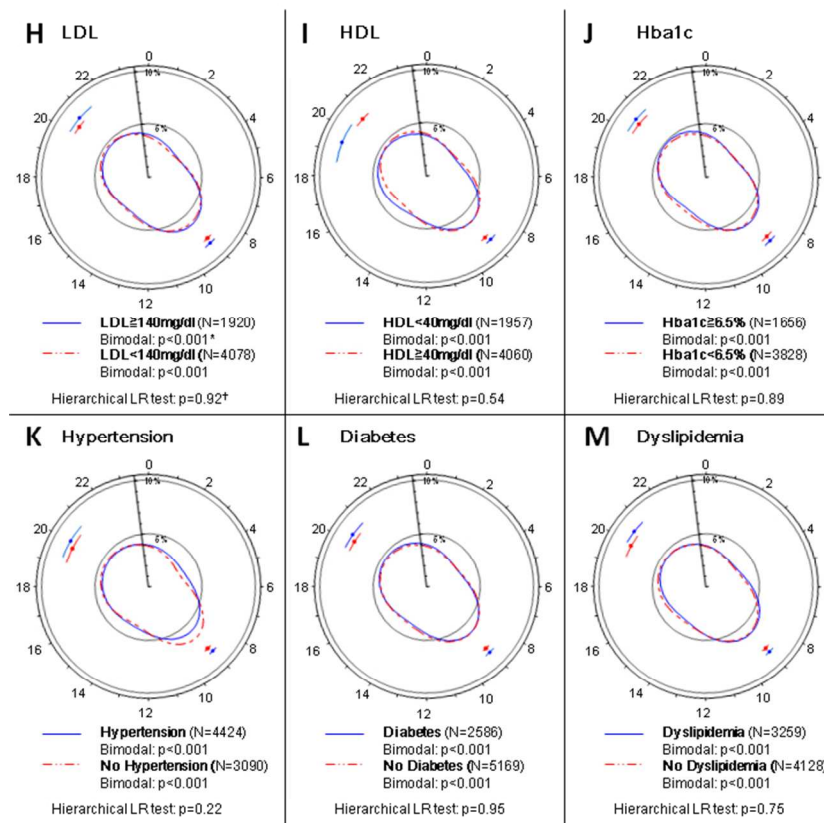

(A) Circular plots of the circadian pattern of AMI onset in the subpopulation with TG levels  $\geq 150$  and  $< 150$  mg/dl, and the circular plot of the corresponding fitted von Mises distributions for each subgroup are shown.

(B)-(M) Circular plots of the fitted von Mises distributions of each subgroup based on smoking habit, age, drinking habit, BG levels, gender, working status, LDL levels, HDL levels, Hba1c, Hypertension, Diabetes and Dyslipidemia.

\* P values from the LR test to examine whether the circadian pattern of AMI onset was uniform, unimodal, or bimodal in each subgroup.

† P values from the hierarchical LR test to examine whether each factor affected the circadian pattern of AMI onset.

190x275mm (96 x 96 DPI)

1  
2  
3  
4  
5  
6  
7  
8  
9  
10  
11  
12  
13  
14  
15  
16  
17  
18  
19  
20  
21  
22  
23  
24  
25  
26  
27  
28  
29  
30  
31  
32  
33  
34  
35  
36  
37  
38  
39  
40  
41  
42  
43  
44  
45  
46  
47  
48  
49  
50  
51  
52  
53  
54  
55  
56  
57  
58  
59  
60

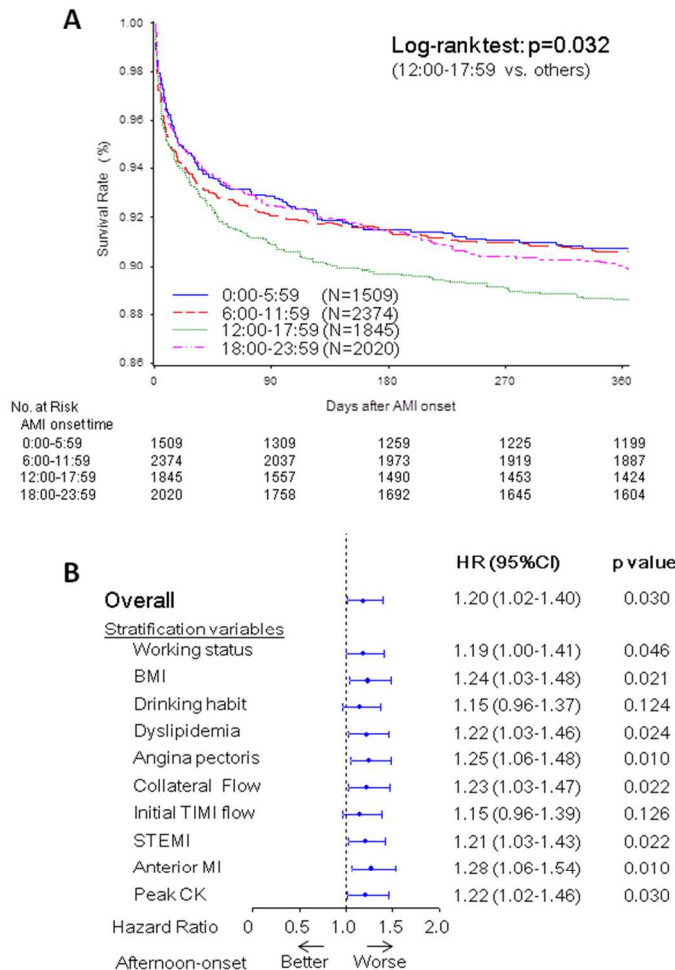

Kaplan-Meier survival curves of one-year mortality among the four AMI onset time subgroups (A). A p value from the log-rank test was used to examine difference in the Kaplan-Meier curves. HR and 95%CI, and p value for the overall population was calculated using univariable Cox regression analysis. The HRs and 95%CIs, and p values for the individual potential confounding variables were calculated using stratified Cox regression analysis, in which the variables were included into the model as stratification factors (B).

190x275mm (96 x 96 DPI)

**eTable 1. Estimated time of peak AMI onset according to subgroup**

| Subgroup       | Estimated time of primary peak onset (95%CI) | Estimated time of second peak onset (95%CI) |
|----------------|----------------------------------------------|---------------------------------------------|
| TG             |                                              |                                             |
| ≥150 mg/dl     | 8:47 h (8:36 - 8:58 h)                       | 8:18 h (2:18 - 14:18 h)                     |
| <150 mg/dl     | 9:06 h (8:51 - 9:20 h)                       | 20:25 h (20:13 - 20:37 h)                   |
| Smoking habit  |                                              |                                             |
| Yes            | 9:07 h (8:57 - 9:18 h)                       | 20:37 h (20:09 - 21:04 h)                   |
| No             | 8:59 h (8:45 - 9:12 h)                       | 20:01 h (19:38 - 20:24 h)                   |
| Age            |                                              |                                             |
| <65 y.o.       | 8:45 h (8:36 - 8:55 h)                       | 20:07 h (19:30 - 20:44 h)                   |
| ≥65 y.o.       | 9:09 h (8:57 - 9:20 h)                       | 20:16 h (19:52 - 20:40 h)                   |
| Drinking habit |                                              |                                             |
| Yes            | 9:00 h (8:48 - 9:13 h)                       | 20:54 h (20:29 - 21:20 h)                   |
| No             | 9:03 h (8:53 - 9:14 h)                       | 19:27 h (18:50 - 20:04 h)                   |
| BG             |                                              |                                             |
| ≥140 mg/dl     | 9:03 h (8:53 - 9:12 h)                       | 20:35 h (20:06 - 21:04 h)                   |
| <140 mg/dl     | 8:53 h (8:37 - 9:09 h)                       | 20:03 h (19:38 - 20:27 h)                   |
| Gender         |                                              |                                             |
| Male           | 9:09 h (9:00 - 9:17 h)                       | 20:09 h (19:34 - 20:45 h)                   |
| Female         | 8:47 h (8:31 - 9:04 h)                       | 19:56 h (19:31 - 20:21 h)                   |
| Working status |                                              |                                             |
| Yes            | 8:51 h (8:41 - 9:01 h)                       | 19:37 h (18:28 - 20:47 h)                   |
| No             | 9:14 h (9:02 - 9:28 h)                       | 20:15 h (19:55 - 20:36 h)                   |
| LDL            |                                              |                                             |
| ≥ 140mg/dl     | 9:11 h (8:57 - 9:24 h)                       | 20:36 h (19:39 - 21:34 h)                   |
| < 140mg/dl     | 9:04 h (8:53 - 9:15 h)                       | 20:20 h (19:58 - 20:42 h)                   |
| HDL            |                                              |                                             |
| < 40mg/dl      | 8:59 h (8:44 - 9:13 h)                       | 19:26 h (18:35 - 20:17 h)                   |
| ≥ 40mg/dl      | 9:07 h (8:56 - 9:18 h)                       | 20:45 h (20:23 - 21:07 h)                   |
| HbA1c          |                                              |                                             |
| ≥6.5%          | 8:59 h (8:43 - 9:16 h)                       | 20:37 h (20:02 - 21:13 h)                   |
| <6.5%          | 9:03 h (8:51 - 9:14 h)                       | 20:16 h (19:49 - 20:42 h)                   |
| Hypertension   |                                              |                                             |
| Yes            | 8:59 h (8:48 - 9:10 h)                       | 20:03 h (19:17 - 20:48 h)                   |
| No             | 9:04 h (8:54 - 9:14 h)                       | 19:48 h (19:06 - 20:30 h)                   |

|              |                        |                           |
|--------------|------------------------|---------------------------|
| Diabetes     |                        |                           |
| Yes          | 9:03 h (8:50 - 9:16 h) | 20:22 h (19:45 – 21:00 h) |
| No           | 9:03 h (8:53 - 9:13 h) | 20:09 h (19:42 – 20:36 h) |
| Dyslipidemia |                        |                           |
| Yes          | 9:01 h (8:49 - 9:13 h) | 20:31 h (19:59 – 21:02 h) |
| No           | 9:02 h (8:52 - 9:13 h) | 19:55 h (19:24 – 20:26 h) |

---

The estimated primary and secondary peak onsets and 95%CI of each subgroup are shown.

For peer review only

**eTable 2. Baseline characteristics in patients based on triglyceride levels at admission**

|                                     | Triglycerides $\geq$ 150 mg/dl<br>(N=1473) | Triglycerides $<$ 150 mg/dl<br>(N=5055) | p value   |
|-------------------------------------|--------------------------------------------|-----------------------------------------|-----------|
| <b>Patients</b>                     |                                            |                                         |           |
| Age (years)                         | 60 (53-68)                                 | 67 (59-75)                              | $<$ 0.001 |
| Male (%)                            | 1233 (83.7)                                | 3725 (73.7)                             | $<$ 0.001 |
| Job (%)                             | 823 (62.3)                                 | 2083 (45.3)                             | $<$ 0.001 |
| BMI (kg/m <sup>2</sup> )            | 24.7 (22.6-27.0)                           | 23.1 (21.1-25.3)                        | $<$ 0.001 |
| <b>Cardiovascular risk factors</b>  |                                            |                                         |           |
| Smoker (%)                          | 1058 (72.4)                                | 3028 (60.7)                             | $<$ 0.001 |
| Drinker (%)                         | 710 (50.4)                                 | 2104 (43.5)                             | $<$ 0.001 |
| Diabetes (%)                        | 581 (39.4)                                 | 1612 (31.9)                             | $<$ 0.001 |
| Hypertension (%)                    | 863 (59.9)                                 | 2954 (60.0)                             | 0.90      |
| Dyslipidemia (%)                    | 956 (67.2)                                 | 1917 (39.2)                             | $<$ 0.001 |
| Previous MI (%)                     | 176 (12.1)                                 | 638 (12.9)                              | 0.45      |
| Angina pectoris (%)                 | 316 (22.0)                                 | 1131 (23.1)                             | 0.37      |
| Multivessel disease (%)             | 500 (35.6)                                 | 1910 (39.8)                             | 0.005     |
| Collateral circulation (%)          | 506 (36.4)                                 | 1728 (36.2)                             | 0.92      |
| <b>Clinical presentation</b>        |                                            |                                         |           |
| Onset admission<br>time $<$ 24h(%)  | 1304 (89.0)                                | 4444 (89.1)                             | 0.93      |
| Killip $\geq$ II (%)                | 190 (13.4)                                 | 877 (18.1)                              | $<$ 0.001 |
| Initial TIMI $\leq$ II (%)          | 919 (67.7)                                 | 3135 (68.1)                             | 0.75      |
| STEMI (%)                           | 1250 (85.6)                                | 4305 (86.1)                             | 0.60      |
| <b>Laboratory data on admission</b> |                                            |                                         |           |
| Blood glucose (mg/dl)               | 159 (126-220)                              | 148 (121-203)                           | $<$ 0.001 |
| HDL cholesterol (mg/dl)             | 41 (36-49)                                 | 45 (38-54)                              | $<$ 0.001 |
| LDL cholesterol (mg/dl)             | 130 (104-157)                              | 120 (98-145)                            | $<$ 0.001 |
| Triglycerides (mg/dl)               | 199 (169-261)                              | 77 (51-105)                             | $<$ 0.001 |
| HbA1c (%)                           | 6.1 (5.6-7.4)                              | 5.9 (5.5-6.8)                           | $<$ 0.001 |
| Peak CK (IU/l)                      | 2097 (1062-3910)                           | 2187 (1083.5-4019.5)                    | 0.28      |
| eGFR (ml/min/1.73 m <sup>2</sup> )  | 65.7 (51.7-80.1)                           | 64.6 (49.3-81.9)                        | 0.21      |
| <b>Localization of MI</b>           |                                            |                                         |           |
| LAD                                 | 570 (40.3)                                 | 2051 (42.5)                             | 0.153     |
| RCA                                 | 512 (36.2)                                 | 1601 (33.2)                             |           |
| LCA                                 | 215 (15.2)                                 | 652 (13.5)                              |           |
| LMT                                 | 23 (1.6)                                   | 102 (2.1)                               |           |

Categorical variables are presented as number (percentage), and continuous variables are presented as

1  
2  
3 quartiles.

4 Categorical variables were compared by the chi-square test, and continuous variables were compared by the  
5 Wilcoxon rank sum test for two-group comparisons.  
6  
7  
8  
9  
10  
11  
12  
13  
14  
15  
16  
17  
18  
19  
20  
21  
22  
23  
24  
25  
26  
27  
28  
29  
30  
31  
32  
33  
34  
35  
36  
37  
38  
39  
40  
41  
42  
43  
44  
45  
46  
47  
48  
49  
50  
51  
52  
53  
54  
55  
56  
57  
58  
59  
60

For peer review only

**eTable 3. Baseline characteristics among groups based on time of AMI onset**

|                                     | 0:00-5:59 h<br>(N=1509) | 6:00-11:59 h<br>(N=2374) | 12:00-17:59 h<br>(N=1845) | 18:00-23:59 h<br>(N=2020) | p<br>value |
|-------------------------------------|-------------------------|--------------------------|---------------------------|---------------------------|------------|
| <b>Patients</b>                     |                         |                          |                           |                           |            |
| Age (years)                         | 66 (57-74)              | 66 (58-74)               | 66 (57-74)                | 65 (57-73)                | 0.077      |
| Male (%)                            | 1166 (77.2)             | 1752 (73.7)              | 1412 (76.5)               | 1542 (76.2)               | 0.050      |
| Employed (%)                        | 656 (48.9)              | 1023 (47.7)              | 785 (47.0)                | 900 (49.2)                | 0.55       |
| BMI (kg/m <sup>2</sup> )            | 23.4 (21.5-25.8)        | 23.4 (21.3-25.6)         | 23.6 (21.5-25.7)          | 23.4 (21.4-25.7)          | 0.44       |
| <b>Cardiovascular risk factors</b>  |                         |                          |                           |                           |            |
| Smoker (%)                          | 974 (65.6)              | 1417 (60.8)              | 1166 (64.3)               | 1308 (65.8)               | 0.002      |
| Drinker (%)                         | 687 (47.9)              | 970 (43.3)               | 737 (42.4)                | 927 (48.4)                | <0.001     |
| Diabetes (%)                        | 520 (34.4)              | 784 (33.0)               | 612 (33.2)                | 670 (33.1)                | 0.80       |
| Hypertension (%)                    | 891 (60.4)              | 1326 (57.8)              | 1057 (59.1)               | 1150 (58.8)               | 0.47       |
| Dyslipidemia (%)                    | 636 (44.3)              | 1026 (45.3)              | 757 (43.0)                | 840 (43.7)                | 0.50       |
| Previous MI (%)                     | 177 (12.0)              | 291 (12.6)               | 230 (12.9)                | 285 (14.5)                | 0.140      |
| Angina pectoris (%)                 | 339 (23.4)              | 521 (22.9)               | 400 (22.7)                | 477 (24.7)                | 0.43       |
| Multivessel disease (%)             | 533 (37.6)              | 828 (37.2)               | 663 (38.6)                | 766 (40.5)                | 0.151      |
| Collateral circulation (%)          | 517 (36.7)              | 750 (33.8)               | 636 (37.2)                | 673 (35.8)                | 0.129      |
| <b>Clinical presentation</b>        |                         |                          |                           |                           |            |
| Onset admission time<br><24 h (%)   | 1348 (90.8)             | 2077 (88.8)              | 1622 (89.2)               | 1757 (87.9)               | 0.057      |
| Killip ≥ II (%)                     | 276 (19.0)              | 377 (16.6)               | 316 (18.0)                | 362 (18.8)                | 0.198      |
| Initial TIMI ≤ II (%)               | 906 (66.9)              | 1457 (68.0)              | 1186 (71.6)               | 1210 (67.2)               | 0.014      |
| STEMI (%)                           | 1258 (84.6)             | 2024 (86.5)              | 1588 (87.3)               | 1697 (85.2)               | 0.092      |
| Anterior MI (%)                     | 672 (46.9)              | 987 (43.9)               | 703 (40.5)                | 852 (44.9)                | 0.002      |
| <b>Laboratory data on admission</b> |                         |                          |                           |                           |            |
| Blood glucose level<br>(mg/dl)      | 151 (123 - 206)         | 155 (124 - 213)          | 149 (122 - 203)           | 149 (120 - 210)           | 0.033      |
| HDL cholesterol (mg/dl)             | 44 (38-53)              | 44 (38-53)               | 44 (37-53)                | 44 (38-53)                | 0.42       |
| LDL cholesterol (mg/dl)             | 123 (101-149)           | 123 (99-148)             | 121 (99-146)              | 119 (97-147)              | 0.171      |
| Triglycerides (mg/dl)               | 91(57-141)              | 100 (63-155)             | 91.5 (58-140)             | 87 (54-132)               | <0.001     |
| HbA1c (%)                           | 5.9 (5.5 - 7.0)         | 6.0 (5.5 - 6.9)          | 5.9 (5.5 - 6.8)           | 5.9 (5.5 - 7.0)           | 0.95       |
| Peak CK (IU/l)                      | 2137<br>(1089-3934.5)   | 2111<br>(1027-4144)      | 2104<br>(1095-3894)       | 2274<br>(1070-3985)       | 0.92       |
| <b>Treatment</b>                    |                         |                          |                           |                           |            |
| Reperfusion (%)                     | 1349 (89.6)             | 2113 (89.2)              | 1645 (89.4)               | 1791 (88.8)               | 0.88       |
| PCI (%)                             | 1316 (87.2)             | 2068 (87.1)              | 1601 (86.8)               | 1749 (86.6)               | 0.94       |



## Drugs at discharge

|                    |             |             |             |             |       |
|--------------------|-------------|-------------|-------------|-------------|-------|
| β blockers (%)     | 677 (44.9)  | 964 (40.6)  | 752 (40.8)  | 836 (41.4)  | 0.043 |
| RAS inhibitors (%) | 1038 (68.8) | 1594 (67.1) | 1240 (67.2) | 1386 (68.6) | 0.56  |
| Statin (%)         | 580 (38.4)  | 859 (36.2)  | 611 (33.1)  | 690 (34.2)  | 0.007 |
| Diuretics (%)      | 387 (25.7)  | 556 (23.4)  | 416 (22.6)  | 529 (26.2)  | 0.024 |
| Ca blockers (%)    | 335 (22.2)  | 493 (20.8)  | 333 (18.1)  | 398 (19.7)  | 0.020 |
| Antiplatelet (%)   | 1359 (90.1) | 2124 (89.5) | 1624 (88.0) | 1814 (89.8) | 0.197 |

Categorical variables are presented as number (percentage), and continuous variables are presented as quartiles. Categorical variables were compared by the chi-square test, and continuous variables were compared by the Kruskal-Wallis test for four-group comparisons.

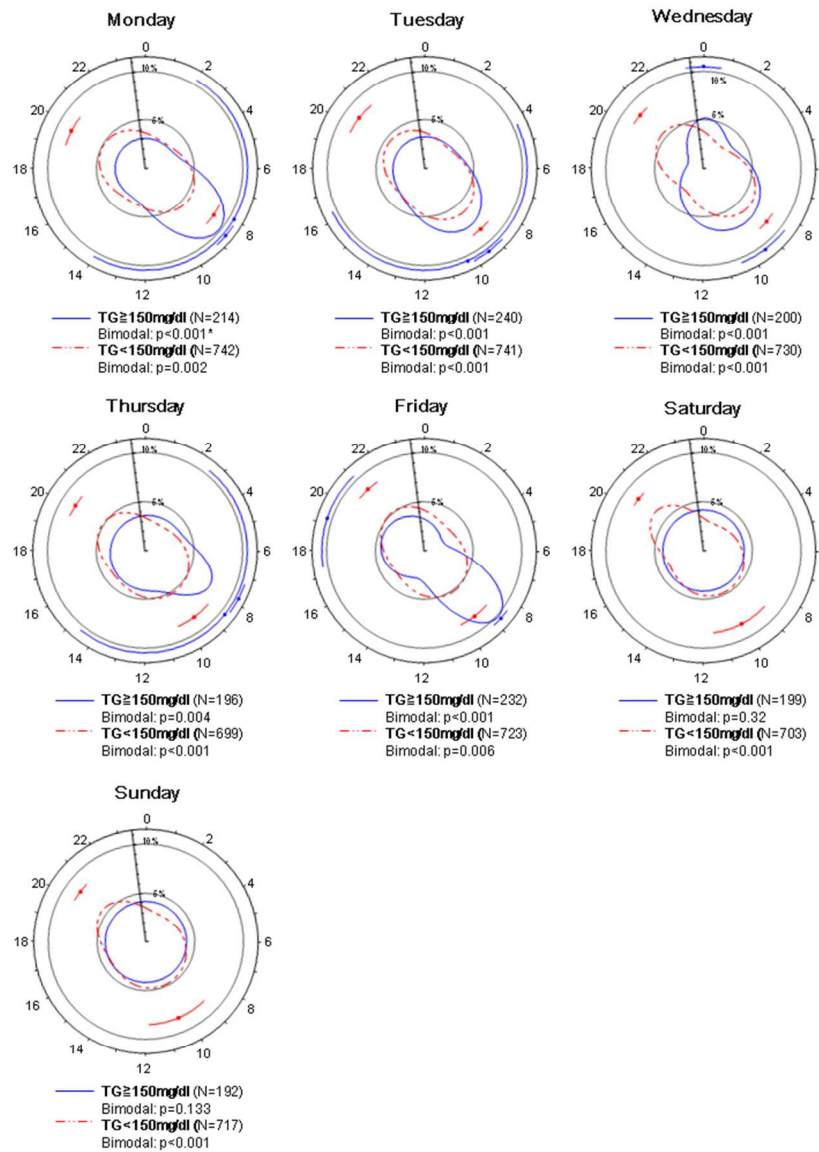

Circular plots of the fitted von Mises distributions for the subpopulation with admission serum TG  $\geq 150$  and  $< 150$  mg/dl according to the day of the week are shown.

\* P values from the LR test to examine whether the circadian pattern of AMI onset was uniform, unimodal, or bimodal in each subgroup.  
190x275mm (96 x 96 DPI)

# BMJ Open

## Association of Lifestyle-related Factors with Circadian Onset Patterns of Acute Myocardial Infarction: a Prospective Observational Study in Japan

|                                 |                                                                                                                                                                                                                                                                                                                                                                                                                                                                                                                                                                                                                                                                                                                                                                                                                                                                                                                                                                                                                                                                                                                                                                                                                                                                                                                                                                                                                                                                                                                                                                                                                                                                                                                             |
|---------------------------------|-----------------------------------------------------------------------------------------------------------------------------------------------------------------------------------------------------------------------------------------------------------------------------------------------------------------------------------------------------------------------------------------------------------------------------------------------------------------------------------------------------------------------------------------------------------------------------------------------------------------------------------------------------------------------------------------------------------------------------------------------------------------------------------------------------------------------------------------------------------------------------------------------------------------------------------------------------------------------------------------------------------------------------------------------------------------------------------------------------------------------------------------------------------------------------------------------------------------------------------------------------------------------------------------------------------------------------------------------------------------------------------------------------------------------------------------------------------------------------------------------------------------------------------------------------------------------------------------------------------------------------------------------------------------------------------------------------------------------------|
| Journal:                        | <i>BMJ Open</i>                                                                                                                                                                                                                                                                                                                                                                                                                                                                                                                                                                                                                                                                                                                                                                                                                                                                                                                                                                                                                                                                                                                                                                                                                                                                                                                                                                                                                                                                                                                                                                                                                                                                                                             |
| Manuscript ID:                  | bmjopen-2014-005067.R1                                                                                                                                                                                                                                                                                                                                                                                                                                                                                                                                                                                                                                                                                                                                                                                                                                                                                                                                                                                                                                                                                                                                                                                                                                                                                                                                                                                                                                                                                                                                                                                                                                                                                                      |
| Article Type:                   | Research                                                                                                                                                                                                                                                                                                                                                                                                                                                                                                                                                                                                                                                                                                                                                                                                                                                                                                                                                                                                                                                                                                                                                                                                                                                                                                                                                                                                                                                                                                                                                                                                                                                                                                                    |
| Date Submitted by the Author:   | 26-Apr-2014                                                                                                                                                                                                                                                                                                                                                                                                                                                                                                                                                                                                                                                                                                                                                                                                                                                                                                                                                                                                                                                                                                                                                                                                                                                                                                                                                                                                                                                                                                                                                                                                                                                                                                                 |
| Complete List of Authors:       | Eda Hiro, Ryuya; Osaka University Graduate School of Medicine, Department of Cardiovascular Medicine<br>Sakata, Yasuhiko; Tohoku University Graduate School of Medicine, Department of Cardiovascular Medicine<br>Nakatani, Daisaku; Osaka University Graduate School of Medicine, Department of Cardiovascular Medicine<br>Suna, Shinichiro; Osaka University Graduate School of Medicine, Department of Cardiovascular Medicine<br>Usami, Masaya; Osaka University Graduate School of Medicine, Department of Cardiovascular Medicine<br>Matsumoto, Sen; Osaka University Graduate School of Medicine, Department of Cardiovascular Medicine<br>Hara, Masahiko; Osaka University Graduate School of Medicine, Department of Cardiovascular Medicine<br>Kitamura, Tetsuhisa; Osaka University Graduate School of Medicine, Department of Social and Environmental Medicine<br>Sato, Hiroshi; Kwansai Gakuin University, School of Human Welfare Studies Health Care Center and Clinic<br>Yamashita, Shizuya; Osaka University Graduate School of Medicine, Department of Community Medicine<br>Nanto, Shinsuke; Osaka University Graduate School of Medicine, Department of Advanced Cardiovascular Therapeutics<br>Hikoso, Shungo; Osaka University Graduate School of Medicine, Department of Cardiovascular Medicine<br>Sakata, Yasushi; Osaka University Graduate School of Medicine, Department of Cardiovascular Medicine<br>Hori, Ma; Osaka Medical Center for Cancer and Cardiovascular Diseases, Hamasaki, Toshimitsu; Osaka University Graduate School of Medicine, Department of Biomedical Statistics<br>Komuro, Issei; University of Tokyo Graduate School of Medicine, Department of Cardiovascular Medicine |
| <b>Primary Subject Heading</b>: | Cardiovascular medicine                                                                                                                                                                                                                                                                                                                                                                                                                                                                                                                                                                                                                                                                                                                                                                                                                                                                                                                                                                                                                                                                                                                                                                                                                                                                                                                                                                                                                                                                                                                                                                                                                                                                                                     |
| Secondary Subject Heading:      | Cardiovascular medicine, Epidemiology                                                                                                                                                                                                                                                                                                                                                                                                                                                                                                                                                                                                                                                                                                                                                                                                                                                                                                                                                                                                                                                                                                                                                                                                                                                                                                                                                                                                                                                                                                                                                                                                                                                                                       |
| Keywords:                       | Myocardial infarction < CARDIOLOGY, Cardiac Epidemiology < CARDIOLOGY, Ischaemic heart disease < CARDIOLOGY                                                                                                                                                                                                                                                                                                                                                                                                                                                                                                                                                                                                                                                                                                                                                                                                                                                                                                                                                                                                                                                                                                                                                                                                                                                                                                                                                                                                                                                                                                                                                                                                                 |

1  
2  
3  
4  
5  
6  
7  
8  
9  
10  
11  
12  
13  
14  
15  
16  
17  
18  
19  
20  
21  
22  
23  
24  
25  
26  
27  
28  
29  
30  
31  
32  
33  
34  
35  
36  
37  
38  
39  
40  
41  
42  
43  
44  
45  
46  
47  
48  
49  
50  
51  
52  
53  
54  
55  
56  
57  
58  
59  
60

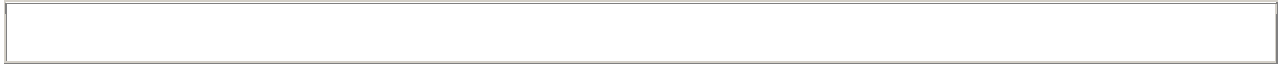

SCHOLARONE™  
Manuscripts

For peer review only

1  
2  
3  
4  
5  
6 Association of Lifestyle-related Factors with Circadian Onset  
7  
8  
9 Patterns of Acute Myocardial Infarction: a Prospective Observational  
10  
11  
12 Study in Japan  
13

14  
15  
16  
17 Ryuya Eda<sup>1)2)</sup>, Yasuhiko Sakata, MD, PhD<sup>1)3)4)</sup>, Daisaku Nakatani, MD, PhD

18  
19  
20 <sup>1)</sup>, Shinichiro Suna, MD, PhD<sup>1)</sup>, Masaya Usami, MD<sup>1)</sup>, Sen Matsumoto, MD<sup>1)</sup>,

21  
22  
23 Masahiko Hara, MD<sup>1)</sup>, Tetsuhisa Kitamura, MD, MSc, DrPH<sup>5)</sup>, Hiroshi Sato, MD,

24  
25  
26 PhD<sup>6)</sup>, Shizuya Yamashita, MD, PhD<sup>1)7)</sup>, Shinsuke Nanto, MD, PhD<sup>1)3)</sup>, Shungo

27  
28  
29 Hikoso, MD, PhD<sup>1)</sup>, Yasushi Sakata, MD, PhD<sup>1)</sup>, Masatsugu Hori, MD, PhD<sup>8)</sup>,

30  
31  
32 Toshimitsu Hamasaki, PhD<sup>2)</sup>, Issei Komuro, MD, PhD<sup>1)9)</sup>, on behalf of the OACIS

33  
34  
35 Investigators  
36

37  
38  
39  
40 1: Department of Cardiovascular Medicine, Osaka University Graduate School of

41  
42  
43 Medicine, Suita, Japan; 2: Department of Biomedical Statistics, Osaka University

44  
45  
46 Graduate School of Medicine, Suita, Japan; 3: Department of Advanced

47  
48  
49 Cardiovascular Therapeutics, Osaka University Graduate School of Medicine,

50  
51  
52 Suita, Japan; 4: Department of Cardiovascular Medicine, Tohoku University

53  
54  
55 Graduate School of Medicine, Sendai, Japan; 5: Department of Social and

1  
2  
3  
4  
5  
6 Environmental Medicine, Osaka University Graduate School of Medicine, Suita,  
7  
8  
9 Japan; 6: School of Human Welfare Studies Health Care Center and Clinic,  
10  
11  
12 Kwansei Gakuin University, Nishinomiya, Japan; 7: Department of Community  
13  
14  
15 Medicine, Osaka University Graduate School of Medicine, Suita, Japan; 8:  
16  
17  
18 Osaka Prefectural Hospital Organization Osaka Medical Center for Cancer and  
19  
20  
21 Cardiovascular Diseases, Osaka, Japan; 9: Department of Cardiovascular  
22  
23  
24 Medicine, University of Tokyo Graduate School of Medicine, Tokyo, Japan  
25  
26  
27  
28

29 Short title: AMI Onset Patterns and Lifestyle-related Factors  
30  
31  
32  
33  
34

35 Total word count of the text: 3572 words  
36  
37  
38  
39  
40

#### 41 Disclosure

42  
43

44 Dr. Komuro has received research grants and speaker's fees from Takeda  
45  
46  
47 Pharmaceutical Company, Astellas Pharma, DAIICHI SANKYO COMPANY,  
48  
49  
50 Boehringer Ingelheim, Novartis Pharma and Shionogi. No other authors have  
51  
52  
53 relationships with industry to disclose or financial associations that might pose a  
54  
55  
56 conflict of interest in connection with the submitted article.  
57  
58  
59  
60

1  
2  
3  
4  
5  
6  
7  
8  
9 Sources of funding

10  
11 This work was supported by Grants-in-Aid for University and Society

12  
13 Collaboration (#19590816 and #19390215) from the Japanese Ministry of

14  
15  
16  
17 Education, Culture, Sports, Science and Technology, Tokyo, Japan.

18  
19  
20  
21  
22  
23 Address for correspondence:

24  
25  
26 Yasuhiko Sakata, MD, PhD

27  
28  
29 Department of Cardiovascular Medicine

30  
31  
32 Osaka University Graduate School of Medicine

33  
34  
35 2-2 Yamada-oka, Suita, 565-0871, Japan.

36  
37  
38 Tel: +81-6-6879-6612, Fax: +81-6-6879-6613,

39  
40  
41 E-mail: [sakatayk@cardiology.med.osaka-u.ac.jp](mailto:sakatayk@cardiology.med.osaka-u.ac.jp)

**Abstract**

**Objective:** The onset of acute myocardial infarction (AMI) shows characteristic circadian variations involving a definite morning peak and less-defined nighttime peak. However, the factors influencing circadian patterns of AMI onset and their influence on morning and nighttime peaks have not been fully elucidated.

**Design, Setting, and Participants:** An analysis of patients registered between 1998 and 2008 in the Osaka Acute Coronary Insufficiency Study, which is a prospective, multicenter observational study of AMI patients in the Osaka region of Japan. The present study included 7755 consecutive patients with a known time of AMI onset.

**Main Outcomes and Measures:** A mixture of two von Mises distributions was used to examine whether a circadian pattern of AMI had uniform, unimodal, or bimodal distribution, and the likelihood ratio test was then used to select the best circadian pattern among them. The hierarchical likelihood ratio test was used to identify factors affecting the circadian patterns of AMI onset. The Kaplan-Meier



1  
2  
3  
4  
5  
6 method was used to estimate survival curves of one-year mortality according to  
7  
8  
9 AMI onset time.

10  
11  
12  
13  
14 **Results:** The overall population had a bimodal circadian pattern of AMI onset  
15  
16 characterized by a high and sharp morning peak and a lower and less-defined  
17  
18 nighttime peak (bimodal:  $p < 0.001$ ). Although several lifestyle-related factors had  
19  
20 a statistically significant association with the circadian patterns of AMI onset,  
21  
22 serum triglyceride levels had the most prominent association with circadian  
23  
24 patterns of AMI onset. Patients with triglyceride  $\geq 150$  mg/dl on admission had  
25  
26 only one morning peak in the circadian pattern of AMI onset during the  
27  
28 weekdays, with no peaks detected on weekends, whereas all other subgroups  
29  
30 had two peaks throughout the week.  
31  
32  
33  
34  
35  
36  
37  
38  
39  
40  
41  
42

43  
44 **Conclusions:** The circadian pattern of AMI onset was characterized by  
45  
46 bimodality. Notably, several lifestyle-related factors, particularly serum  
47  
48 triglyceride levels, had a strong relation with the circadian pattern of AMI onset.  
49  
50  
51  
52  
53  
54  
55  
56  
57  
58  
59  
60

### Strengths and limitations of this study

- We comprehensively analyzed the circadian patterns of AMI onset in a large, multicenter cohort of patients in relation to patient characteristics, lifestyle factors, and day of the week.
- A mixture of two von Mises distributions revealed that the circadian pattern of AMI onset exhibited bimodality.
- Several lifestyle-related factors were shown to be associated with circadian patterns of AMI onset, depending on the day of the week. In particular, it was demonstrated that elevated serum triglyceride levels on admission accentuated morning peak of AMI onset during the weekdays.
- Subjects were limited to those who were hospitalized for AMI.
- Laboratory data were evaluated on admission.

## Introduction

Onset patterns of acute myocardial infarction (AMI) exhibit circadian variation that is characterized by an increased frequency in the morning and a secondary peak incidence at nighttime.<sup>1</sup> Several studies have confirmed that AMI onset exhibits a bimodal circadian pattern, with peaks occurring in the morning hours<sup>2-4</sup> and nighttime hours.<sup>1,4-7</sup> However, it is not well understood what factors, particularly among lifestyle-related factors, influence the circadian patterns of AMI. Moreover, although these patterns appear to vary according to the day of the week,<sup>8</sup> it is unclear how circadian patterns of AMI onset vary throughout the week, particularly, in association with socioeconomic factors.

Because AMI and subsequent ischemic heart failure are the leading causes of death in both developed and developing countries, primary prevention of AMI is a major healthcare issue worldwide. Accordingly, identifying potential factors influencing the circadian pattern of AMI may help in the clinical management of patients for preventing the onset of AMI.

In the present study, we comprehensively analyzed the circadian patterns of AMI onset in a large, multicenter cohort of patients in relation to patient characteristics, lifestyle factors, and day of the week.

## Methods

### OACIS registry and study subjects

The OACIS is a prospective, multicenter observational study collecting demographic, procedural, biological, and outcome data as well as blood samples from AMI patients hospitalized at 25 collaborating hospitals from the Osaka region of Japan (UMIN-Clinical Trial Registry ID: UMIN000004575).<sup>9-10</sup> A diagnosis of AMI was made if the patient fulfilled at least two of the following three criteria; 1) history of central chest pressure, pain, or tightness lasting 30 min, (2) typical electrocardiographic changes (i.e., ST-segment elevation  $\geq 0.1$  mV in 1 standard limb lead or 2 precordial leads, ST-segment depression  $\geq 0.1$  mV in 2 leads, abnormal Q waves, or T-wave inversion in 2 leads), and (3) an increase in serum creatine kinase levels of two times the upper normal limit in each hospital. All the collaborating hospitals were encouraged to enroll consecutive patients with AMI.

We prospectively collected data by research cardiologists and trained research nurses using a specific reporting form, and the following variables were

1  
2  
3  
4  
5  
6 extracted from the OACIS registry database: age, gender, working status, body  
7  
8  
9 mass index (BMI), coronary risk factors (diabetes, hypertension, dyslipidemia,  
10  
11  
12 smoking, drinking, previous myocardial infarction, multi-vessel disease, and  
13  
14 collateral circulation), clinical presentation on admission (KILLIP classification,  
15  
16 initial TIMI flow, and ST-elevation myocardial infarction), coronary angiography  
17  
18 data, reperfusion therapy, laboratory data on admission (hemoglobin A1c, total  
19  
20 cholesterol, low- and high-density lipoprotein cholesterol, triglyceride, and  
21  
22 estimated glomerular filtration rate) and medications at discharge (RAS  
23  
24 inhibitors, beta-blocker, calcium channel blocker, statin, anti-platelet agent, and  
25  
26 diuretics). Diabetes mellitus was defined as fasting plasma glucose  $\geq 126$  mg/dl,  
27  
28 hemoglobin A1c  $\geq 6.5\%$  or a history of anti-diabetic therapy. Hypertension was  
29  
30 defined as a history of systolic blood pressure  $\geq 140$  mmHg, diastolic blood  
31  
32 pressure  $\geq 90$  mmHg, or antihypertensive therapy. Dyslipidemia was defined as  
33  
34 fasting total cholesterol  $\geq 220$  mg/dl, low-density lipoprotein cholesterol  $\geq 140$   
35  
36 mg/dl, high-density lipoprotein cholesterol  $\leq 40$  mg/dl, fasting triglycerides  $\geq 150$   
37  
38 mg/dl, or lipid-lowering therapy.  
39  
40  
41  
42  
43  
44  
45  
46  
47  
48  
49  
50

51  
52 The study protocol has been approved by the ethics committee of each  
53  
54  
55 participating hospital. All in-hospital data were obtained after written informed  
56  
57  
58  
59  
60

1  
2  
3  
4  
5  
6 consent and were then transmitted to the data collection center at the  
7  
8  
9 Department of Cardiovascular Medicine, Osaka University Graduate School of  
10  
11  
12 Medicine, Suita, Japan for processing and analysis. The corresponding authors  
13  
14  
15 had full access and validated to all data in the study.

16  
17  
18 In the present study, we analyzed 7755 AMI patients whose time of AMI onset  
19  
20  
21 was definitely identified among the 8603 consecutive patients registered in the  
22  
23  
24 OACIS registry between 1998 and 2008. Patients' baseline characteristics are  
25  
26  
27 presented in Table 1.

### 32 **Statistical analysis**

33  
34  
35 Continuous variables were summarized as quartiles and were compared by the  
36  
37  
38 Wilcoxon rank sum test for two-group comparisons, and the Kruskal-Wallis test  
39  
40  
41 for four-group comparisons. Categorical variables were presented as number  
42  
43  
44 and percentage, and were compared by the chi-square test. A mixture of two von  
45  
46  
47 Mises distributions was used to examine whether a circadian pattern of AMI  
48  
49  
50 onset had uniform (no peak), unimodal (one peak), or bimodal distribution (two  
51  
52  
53 peaks), and the likelihood ratio test was then used to select the best circadian  
54  
55  
56 pattern among them.<sup>11</sup> In addition, the hierarchical likelihood ratio test was  
57  
58  
59  
60

1  
2  
3  
4  
5  
6 assessed to identify factors affecting the circadian patterns of AMI onset. The  
7  
8  
9 Kaplan-Meier method was used to estimate survival curves of one-year mortality  
10  
11  
12 according to AMI onset time (morning [6:00-11:59 h], afternoon [12:00-17:59 h],  
13  
14 evening [18:00-23:59 h], and nighttime [0:00-5:59 h]). The log-rank test was  
15  
16  
17 used to compare survival curves between the groups, and the Cox proportional  
18  
19  
20 hazards regression model was used to estimate hazard ratios and 95%  
21  
22  
23 confidence intervals (CI). To reduce potential confounding effects due to patient  
24  
25  
26 background variability in the comparison between the afternoon-onset and other  
27  
28  
29 groups, a stratified Cox proportional hazards regression model was used, in  
30  
31  
32 which the potential confounding variables were included into the model as  
33  
34  
35 stratification factors. Cosinor-analysis was used to estimate the amplitude of  
36  
37  
38 serum TG levels on admission according to AMI onset time. Then, F-test for the  
39  
40  
41 existence of a rhythm (amplitude) was used to examine whether the amplitude of  
42  
43  
44 serum TG levels on admission in patients with AMI had circadian variation or not.  
45  
46  
47 Statistical significance was set as  $p < 0.05$ . All statistical analyses were performed  
48  
49  
50 using an in-house validated Fortran program or SAS version 9.3 (SAS Institute  
51  
52  
53 Inc., Cary, NC).

## Results

### Bimodal circadian patterns of AMI onset in the overall population

The daily patterns of AMI onset in our cohort of 7755 patients were first analyzed using the likelihood ratio test (Figure 1). In the overall population, AMI onset clearly exhibited a circadian pattern consisting of two peaks (bimodal:  $p < 0.001$ ): a primary peak at 9:01 h (95%CI: 8:53-9:08 h) and a secondary peak at 20:11 h (95%CI: 19:48-20:34 h). The primary peak was more clearly defined than the secondary peak in both the circular and columnar histograms (Figure 1A and 1B, respectively).

Likelihood ratio test analysis revealed that the peak time of AMI onset varied according to the day of the week (Figure 2). For example, the primary peak onset time was earliest on Monday (8:24 h [95%CI: 8:04-8:44 h]) and latest on Sunday (9:44 h [95%CI: 9:22-10:06 h]). On Tuesday, patients exhibited a circadian pattern of AMI onset characterized by late primary (9:28 h [95%CI: 9:06-9:51 h]) and secondary peak onset times (21:13 h [95%CI: 20:40-21:46 h]), whereas earlier peak onset times (8:43 h [95%CI: 8:15-9:10 h], and 19:09 h [95%CI: 18:23-19:55 h]) were detected on Thursday. Notably, the evening peak was higher, and sharper than the morning peak on Saturday (Figure 2).



### Factors affecting circadian patterns of AMI onset

Hierarchical likelihood ratio analysis revealed that serum TG levels on admission, smoking, age, drinking, blood glucose levels on admission, gender, and working status had a statistically significant association with the circadian pattern of AMI onset, whereas several other known risk factors for AMI, including HDL- and LDL-cholesterol, Hba1c, hypertension, diabetes and dyslipidemia were not related to the observed patterns (Figure 3, eTable 1).

Among the positively associated factors, serum TG levels on admission had the greatest association with the circadian pattern of AMI onset. Although the likelihood ratio test demonstrated that patients with admission serum TG levels of  $\geq 150$  mg/dl (N=1473) had the two characteristic peaks during the day, the peak pattern clearly differed from the other subpopulation groups. In patients with admission serum TG levels of  $\geq 150$  mg/d, both peaks occurred in the morning and nearly overlapped (8:18 h and 8:47 h) (Figure 3A). Therefore, the subpopulation with admission TG levels  $\geq 150$  mg/dl was considered to have a high frequency of AMI onset only in the morning.

The baseline characteristics and laboratory data of patients with serum

1  
2  
3  
4  
5  
6 TG levels of  $\geq 150$  and  $<150$  mg/dl on admission are shown in eTable 2. In the  
7  
8  
9 subpopulation with higher TG levels, the circadian patterns of AMI onset was  
10  
11 characterized by a large, sharp peak in the morning from Monday to Friday, but  
12  
13 no peaks were detected on Saturday and Sunday (bimodal:  $p=0.32$  and  $p=0.133$ ,  
14  
15 respectively) (eFigure 1). In contrast, patients with admission serum TG levels of  
16  
17  
18  
19  
20  
21  
22  
23  
24  
25  
26  
27  
28  
29  
30  
31  
32  
33  
34  
35  
36  
37  
38  
39  
40  
41  
42  
43  
44  
45  
46  
47  
48  
49  
50  
51  
52  
53  
54  
55  
56  
57  
58  
59  
60

<150 mg/dl (N=5055) had onset peaks that occurred in the morning and evening consistently throughout the week (eFigure 1).

A likelihood ratio test demonstrated that other all subpopulations had two AMI onset peaks during the day: one in the morning and the other in the evening (Figure 3, eTable 1). The subpopulations that were grouped according to smoking habit, age  $< 65$  years old, male gender, and active employment had a circadian pattern of AMI onset with a sharper primary peak and less-defined sharp secondary peak compared to the other subpopulations (Figure 3B,C,F,G, eTable1), although the peak heights were similar between the subpopulations, with the exception of the smokers/nonsmokers subpopulations. The primary AMI onset peak in the subpopulation of smokers was higher than that among nonsmokers, whereas the secondary peaks were similar. Drinkers had a circadian pattern of AMI onset that was characterized by a lower and less sharp

1  
2  
3  
4  
5  
6 peak in the morning, and a higher, sharper and later peak in the evening (9:00 h  
7  
8  
9 [95%CI: 8:48-9:13 h], 20:54 h [95%CI: 20:29-21:20 h]) compared to nondrinkers  
10  
11  
12 (9:03 h [95%CI: 8:53-9:14 h], 19:27 h [95%CI: 18:50-20:04 h]) (Figure 3D,  
13  
14  
15 eTable1). The subpopulation with admission blood glucose  $\geq 140$  mg/dl exhibited  
16  
17  
18 a circadian pattern of AMI onset with a higher and sharper primary peak and a  
19  
20  
21 less-defined secondary peak compared to the subpopulation of AMI patients with  
22  
23  
24 blood glucose  $< 140$  mg/dl on admission (Figure 3E).  
25  
26  
27  
28

### 29 **One-year mortality according to onset time of AMI**

30  
31  
32 One-year mortality was compared among four patient subpopulations that  
33  
34  
35 were grouped according to the time range of AMI onset. The baseline  
36  
37  
38 characteristics and laboratory data for the four groups are presented in eTable 3.  
39  
40  
41 A total of 753 deaths were recorded during a median follow-up period of 365  
42  
43  
44 days. Kaplan-Meier survival analysis demonstrated that the afternoon-onset  
45  
46  
47 (12:00-17:59 h) group had worse 1-year mortality than the other 3 groups (log  
48  
49  
50 rank test,  $p=0.032$ ) (Figure 4A). In the subgroup of patients with ST-elevation  
51  
52  
53 myocardial infarction (STEMI), the result was similar (log rank test,  $p=0.007$ ).  
54  
55  
56 Univariable Cox regression analysis revealed that the HR of 1-year mortality in  
57  
58  
59  
60

1  
2  
3  
4  
5  
6 the afternoon-onset group as compared to the other three groups was 1.20  
7  
8  
9 (95%CI 1.02-1.40,  $p=0.030$ , Figure 4B). This result did not generally change  
10  
11  
12 after stratification with potential confounding factors that showed a different trend  
13  
14  
15 between the afternoon-onset group and other three groups (Figure 4B).  
16  
17  
18  
19

## 20 Discussion

21  
22  
23 In the present study, we confirmed that AMI onset exhibits a circadian pattern  
24  
25 characterized by bimodality, with a definite morning peak and a less-defined  
26  
27 evening peak. Notably, several lifestyle-related factors were associated with  
28  
29 variation in the circadian pattern of AMI onset. In particular, serum TG levels on  
30  
31 admission for AMI were associated with a unique pattern of AMI onset that is  
32  
33 characterized by augmented unimodal peaks on weekday mornings, suggesting  
34  
35 that individual lifestyle may affect the onset pattern of AMI.  
36  
37  
38  
39  
40  
41  
42  
43  
44  
45

### 46 Bimodal pattern of AMI onset: morning and nighttime peaks

47  
48  
49 AMI onset in our large patient cohort generally followed a circadian pattern that  
50  
51 was characterized by a high and sharp morning peak and a lower and  
52  
53 less-defined sharp nighttime peak (Figure 1), a finding that is consistent with the  
54  
55  
56  
57  
58  
59  
60

1  
2  
3  
4  
5  
6 results of previous investigations.<sup>1-7</sup> Interestingly, the time of two peaks shifted in  
7  
8  
9 a synchronous fashion during the weekdays; the secondary peaks generally  
10  
11  
12 occurred around 11 to 12 h after the morning peaks on Monday through Friday  
13  
14 (Figure 2). For example, AMI onset exhibited early morning and nighttime peaks  
15  
16 on Monday and Thursday, whereas that on Tuesday exhibited late morning and  
17  
18 nighttime peaks. Although this finding is partly consistent with the observation of  
19  
20 Peters et al.,<sup>5</sup> who reported that a secondary peak in AMI onset occurs 11 to 12  
21  
22 h after waking, the present study firstly demonstrated that this synchrony was  
23  
24 present on the weekdays, but absent on the weekends.  
25  
26  
27  
28  
29  
30  
31

32 Several physiological processes are considered to contribute to the  
33  
34 bimodal pattern of AMI onset. For example, Stergiou et al.<sup>12</sup> demonstrated that  
35  
36 the two-peak diurnal variation in stroke onset occurs in parallel with variation in  
37  
38 blood pressure, pulse rate, and physical activity. Thus, the bimodality of blood  
39  
40 pressure and heart rate<sup>13-14</sup> is the most likely explanation for the circadian  
41  
42 patterns of AMI onset observed in the present study. A greater morning surge of  
43  
44 blood pressure and heart rate<sup>13</sup> may explain why the nighttime peak of AMI  
45  
46 onset was lower and less-defined than the morning peak. In addition, increased  
47  
48 blood viscosity<sup>15</sup> and thrombogenicity due to morning hypercoagulability<sup>16</sup> and  
49  
50  
51  
52  
53  
54  
55  
56  
57  
58  
59  
60

1  
2  
3  
4  
5  
6 hypofibrinolysis<sup>17</sup> also likely increased the frequency of AMI onset in the morning.  
7

8  
9 It is also possible that external factors, such as physical exertion and mental  
10  
11 stress, could be triggers for the morning onset of AMI.<sup>18</sup> In the present study, the  
12  
13 younger (<65 years old), working, male, and smoker subpopulations had a sharp  
14  
15 morning peak of AMI onset compared with the elderly, nonworking, female, and  
16  
17 nonsmoking subpopulations (Figure 3B,C,F,G). The sharpness of the morning  
18  
19 peak might be related to increased susceptibility to physical and mental stresses  
20  
21 in these subpopulations, in which they are more likely to start activities or go to  
22  
23 work soon after waking up. Similarly, the sharp and early morning peak of AMI  
24  
25 onset that was detected on Monday may be due to the increased physical and  
26  
27 mental stress that is associated with the first morning of the week (Figure 2). We  
28  
29 also found that the morning peak occurred latest on Sunday (Figure 2). Together,  
30  
31 these findings strongly suggest that mental and physical activity and/or stress  
32  
33 may act as a trigger for the morning onset of AMI.  
34  
35  
36  
37  
38  
39  
40  
41  
42  
43  
44  
45

46 Although many reports have examined the primary peak of AMI onset,  
47  
48 relatively little attention has been paid to the secondary peak. We demonstrated  
49  
50 that drinkers had a higher, sharper, and later nighttime peak of AMI onset than  
51  
52 nondrinkers (Figure 3D). Moreover, the nighttime peak on Saturday was the  
53  
54  
55  
56  
57  
58  
59  
60

1  
2  
3  
4  
5  
6 highest and sharpest amongst the seven days of the week (Figure 2). This  
7  
8  
9 observation may be explained by the fact that people might likely consume  
10  
11 alcohol and engage in social activities on Saturday night in Japan. Thus, these  
12  
13 evening activities can result in increased sympathetic nerve activity and  
14  
15 therefore may have contributed to the increased frequency of AMI onset at night.  
16  
17  
18 Taken together, our findings suggest that both the morning and nighttime peaks  
19  
20  
21 of AMI onset are influenced by physiological and socioeconomic factors.  
22  
23  
24  
25  
26  
27  
28

### 29 **Associations of lifestyle-related factors with circadian patterns of AMI**

#### 30 **onset**

31  
32  
33  
34  
35 Many previous studies on circadian pattern of AMI onset considered gender, age,  
36  
37 working status as potential factors affecting the circadian patterns of AMI  
38  
39 onset.<sup>1,4-6</sup> Here, we additionally incorporated laboratory data, disease, and other  
40  
41 socioeconomic factors into our analyses and found that several lifestyle-related  
42  
43 factors, including admission serum TG and blood glucose levels, age, gender,  
44  
45 working status, and smoking and drinking habits had statistically significant  
46  
47 associations with the circadian pattern of AMI onset. Among these factors,  
48  
49 elevated serum TG levels ( $\geq 150$  mg/dl) on admission had the largest  
50  
51  
52  
53  
54  
55  
56  
57  
58  
59  
60

1  
2  
3  
4  
5  
6 associations with circadian patterns of AMI onset, while the amplitude of serum  
7  
8  
9 TG levels on admission in patients with AMI didn't have circadian variation  
10  
11  
12 (p=0.52) (eFigure 2).  
13

14  
15 There are several evidences to support our findings. First, fasting  
16  
17 hypertriglyceridemia and postprandial hyperlipidemia, which is characterized by  
18  
19 postprandial accumulation of TG-rich lipoproteins and their partially hydrolyzed  
20  
21 products, are both closely related to the development of atherosclerotic  
22  
23 cardiovascular diseases.<sup>19-21</sup> Several studies have also reported that elevated  
24  
25 serum TG levels are associated with an increased risk of myocardial  
26  
27 infarction.<sup>22-23</sup> Hypertriglyceridemia is associated with increased  
28  
29 thrombogenicity,<sup>24-25</sup> which is reportedly associated with increased plasminogen  
30  
31 activator inhibitor-1 (PAI-1)<sup>26-28</sup> and factor VII coagulant activities,<sup>29-30</sup> and  
32  
33 viscosity.<sup>31</sup> These three factors have also been reported to affect the  
34  
35 development of MI.<sup>32-34</sup> Moreover, hypertriglyceridemia is also related to  
36  
37 endothelium dysfunction,<sup>35-36</sup> which contributes to the pathogenesis of coronary  
38  
39 artery disease.<sup>37</sup> In healthy subjects, serum TG levels also exhibit circadian  
40  
41 variation with a peak around 3 AM.<sup>38</sup> Thus, it is conceivable that patients with  
42  
43 hypertriglycemia have further augmented TG levels and are therefore exposed  
44  
45  
46  
47  
48  
49  
50  
51  
52  
53  
54  
55  
56  
57  
58  
59  
60



1  
2  
3  
4  
5  
6 to increased thrombogenicity and endothelium dysfunction in the early morning  
7  
8  
9 hours before dawn, which may explain the accentuated morning peak of AMI  
10  
11  
12 onset in patients with admission TG  $\geq 150$  mg/dl. Finally, it is reported that high  
13  
14  
15 plasma PAI-1 levels and excessive surges in morning blood pressure are  
16  
17  
18 independently and additively associated with increased risk of stroke in older  
19  
20  
21 hypertensive patients.<sup>39</sup> Thus, these lines of evidence strongly support our  
22  
23  
24 observation of a higher morning risk of AMI onset in the subpopulation with  
25  
26  
27 admission hypertriglyceridemia.  
28  
29  
30  
31

### 32 **Altered circadian patterns of AMI onset in patients with increased TG** 33 34 35 **levels on admission.** 36

37  
38 To our knowledge, this is the first study to demonstrate an association between  
39  
40  
41 admission serum TG levels and circadian patterns of AMI onset, as  
42  
43  
44 characterized by a lack of an evening peak in AMI onset in the subgroup of  
45  
46  
47 serum TG levels on admission  $\geq 150$  mg/dl compared to all other subgroups  
48  
49  
50 (Figure 3). While LDL/HDL levels are considered to be closely associated with  
51  
52  
53 the development of atherosclerosis, LDL/HDL levels were not associated with  
54  
55  
56 onset patterns of AMI in the present study. Although the precise mechanisms for  
57  
58  
59  
60

1  
2  
3  
4  
5  
6 the altered circadian patterns of AMI onset in patients with increased admission  
7  
8  
9 serum TG levels are unclear, increased serum TG might have influenced  
10  
11  
12 peripheral clocks residing in various tissues throughout the body, disrupting  
13  
14  
15 circadian patterns of AMI onset. Indeed, recent studies have shown that energy  
16  
17  
18 metabolism is an important modulator of peripheral circadian clock in  
19  
20  
21 cardiovascular tissues.<sup>40-41</sup>  
22

23  
24 Our subpopulation analyses also revealed that the circadian patterns of  
25  
26 AMI onset in patients with admission TG levels of  $\geq 150$  mg/dl had a sharp  
27  
28  
29 morning peak during weekdays, whereas no such peak was detected on  
30  
31  
32 Saturday or Sunday. This observation strongly suggests that increased  
33  
34  
35 thrombogenicity and endothelium dysfunction was a factor, but not the trigger,  
36  
37  
38 for the morning onset of AMI in our study cohort. Thus, it is conceivable that the  
39  
40  
41 accentuated morning peak of AMI onset in patients with admission TG  $\geq 150$   
42  
43  
44 mg/dl may be due to the combination of the following three factors: 1) increased  
45  
46  
47 hypercoagulability, hypofibrinolysis, viscosity, and endothelium dysfunction  
48  
49  
50 resulting from elevated serum TG levels, 2) increased risk of a morning surge of  
51  
52  
53 blood pressure and heart rate, and 3) mental and physical stresses.  
54  
55  
56  
57  
58  
59  
60

### One-year mortality according to AMI onset time

The association between AMI onset time and mortality is controversial. For example, Manfredini et al.<sup>42</sup> reported that patients with a morning onset of AMI are characterized by higher fatal outcome, independent of site and size of infarction, while Bae et al.<sup>43</sup> reported that patients with an evening-onset AMI had the worst one-year mortality in association with poor baseline clinical characteristics. On the other hand, Holmes et al.<sup>44</sup> observed no significant association between circadian patterns of onset time and in-hospital mortality in patients with ST-elevation myocardial infarction (STEMI) after adjusting for clinical risk factors.

In the present study, patients with an afternoon onset of AMI had the worst 1-year mortality (Figure 4A). However, the baseline clinical characteristics were comparable among the four onset-time groups in our study cohort. Indeed, stratification for potential confounding variables did not generally change the results, suggesting that the increased prognostic risk of AMI in the afternoon-onset group was not simply explained by differences in baseline characteristics in the present study (Figure 4B). Anyway, the patient background and physiological circadian rhythms might complexly interact with each other

1  
2  
3  
4  
5  
6 and affect mortality after AMI, which could lead to these different results among  
7  
8  
9 the studies and difficulty in interpreting the results. Further investigations are  
10  
11  
12 required to clarify the association of mortality after AMI and onset time.  
13

### 14 15 16 17 **Limitations**

18  
19  
20 A few limitations of the present study warrant mention. First, this was an analysis  
21  
22  
23 of prospective observational study and the results may have therefore been  
24  
25  
26 influenced by potential confounding factors, even after adjustment for baseline  
27  
28  
29 clinical and angiographic characteristics. Thus, caution is needed when  
30  
31  
32 interpreting the data and making generalizations to other cohorts. Second, the  
33  
34  
35 laboratory findings, including serum TG levels, were evaluated on admission.  
36  
37  
38 Therefore, we could not exclude the influence of food consumption and circadian  
39  
40  
41 variation of several factors, particularly serum TG levels, making interpretation of  
42  
43  
44 the data difficult. However, our results also demonstrated that serum TG levels  
45  
46  
47 were not likely the final trigger for AMI onset, as patients with TG  $\geq 150$  mg/dl on  
48  
49  
50 admission did not exhibit a morning peak of AMI onset on the weekend. In  
51  
52  
53 patients with hypertriglycemia, hypercoagulability, hypofibrinolysis, viscosity and  
54  
55  
56 endothelium dysfunction are generally increased during the early morning hours  
57  
58  
59  
60

1  
2  
3  
4  
5  
6 before dawn,<sup>26-31,35-36,38</sup> resulting in enhanced susceptibility to AMI onset. Thus,  
7  
8  
9 under such conditions, it is conceivable that increased sympathetic activity,  
10  
11  
12 which was further enhanced in association with mental, physical, and/or other  
13  
14  
15 factors, could be the final trigger for AMI onset on weekday mornings in patients  
16  
17  
18 with TG  $\geq$ 150 mg/dl on admission. Based on these findings, the influence of  
19  
20  
21 meal intake and circadian variation of serum TG levels on the morning peak of  
22  
23  
24 AMI onset in the population with TG  $\geq$ 150 mg/dl may be minimal, if not  
25  
26  
27 negligible.

## 32 **Conclusions**

33  
34  
35 In our large cohort of consecutive AMI patients, the circadian pattern of AMI  
36  
37  
38 onset exhibited bimodality and was shown to be associated with several  
39  
40  
41 lifestyle-related factors. Among these factors, increased serum TG levels on  
42  
43  
44 admission had the most marked association with circadian variation, which was  
45  
46  
47 characterized by an increased morning risk of AMI onset during weekdays in this  
48  
49  
50 subpopulation. Our findings may help to identify the underlying triggers and  
51  
52  
53 substrates of AMI onset and help suggest preventive measures of AMI. However,  
54  
55  
56 cautions are warranted to interpret our results and confirmation in other cohorts  
57  
58  
59  
60

1  
2  
3  
4  
5  
6 is required.  
7  
8  
9  
10

### 11 **Author affiliations**

12  
13  
14  
15 1: Department of Cardiovascular Medicine, Osaka University Graduate School of  
16  
17  
18 Medicine, Suita, Japan  
19

20  
21 2: Department of Biomedical Statistics, Osaka University Graduate School of  
22  
23  
24 Medicine, Suita, Japan  
25

26  
27 3: Department of Advanced Cardiovascular Therapeutics, Osaka University  
28  
29  
30 Graduate School of Medicine, Suita, Japan  
31

32  
33 4: Department of Cardiovascular Medicine, Tohoku University Graduate School  
34  
35  
36 of Medicine, Sendai, Japan  
37

38  
39 5: Department of Social and Environmental Medicine, Osaka University  
40  
41  
42 Graduate School of Medicine, Suita, Japan  
43

44  
45 6: School of Human Welfare Studies Health Care Center and Clinic, Kwansai  
46  
47  
48 Gakuin University, Nishinomiya, Japan  
49

50  
51 7: Department of Community Medicine, Osaka University Graduate School of  
52  
53  
54 Medicine, Suita, Japan  
55

56  
57 8: Osaka Prefectural Hospital Organization Osaka Medical Center for Cancer  
58  
59  
60

1  
2  
3  
4  
5  
6 and Cardiovascular Diseases, Osaka, Japan  
7

8  
9 9: Department of Cardiovascular Medicine, University of Tokyo Graduate School  
10  
11 of Medicine, Tokyo, Japan  
12

### 13 14 **Contributors**

15  
16  
17 RE and YKS (Yasuhiko Sakata) participated in study concept and design. DN,  
18  
19 SS, MU, SM and MH participated in acquisition of data. RE, YKS, SY and TH  
20  
21 participated in analysis and interpretation of the data. YKS, TK, HS, SH, YSS  
22  
23 (Yasushi Sakata), SY, MH and TH participated in drafting and critical revision of  
24  
25 the manuscript for important intellectual content. RE and TH participated in  
26  
27 statistical analysis. YKS, HS, SN, MH and IK obtained funding.  
28  
29  
30  
31  
32  
33

### 34 35 **Funding**

36  
37 This work was supported by Grants-in-Aid for University and Society  
38  
39 Collaboration (#19590816 and #19390215) from the Japanese Ministry of  
40  
41 Education, Culture, Sports, Science and Technology, Tokyo, Japan.  
42  
43  
44  
45

### 46 47 **Competing interests**

48  
49 Dr. Komuro has received research grants and speaker's fees from Takeda  
50  
51 Pharmaceutical Company, Astellas Pharma, DAIICHI SANKYO COMPANY,  
52  
53 Boehringer Ingelheim, Novartis Pharma and Shionogi. No other authors have  
54  
55  
56  
57  
58  
59  
60

relationships with industry to disclose or financial associations that might pose a conflict of interest in connection with the submitted article.

### **Patient consent**

Obtained.

### **Ethics approval**

The study protocol has been approved by the ethics committee of each participating hospital.

### **Data sharing statement**

No additional data available.

### **Acknowledgements**

We thank Mariko Kishida, Rie Nagai, Nanase Muraoka, Hiroko Takemori, Akiko Yamagishi, Kumiko Miyoshi, Chizuru Hamaguchi, Hiroko Machida, Mariko Yoneda, Nagisa Yoshioka, Mayuko Tomatsu, Kyoko Tatsumi, Tomoko Mizuoka, Shigemi Kohara, Junko Tsugawa, Junko Isotani, Sachiko Ashibe, and all other OACIS research coordinators and nurses for their excellent assistance with data collection.

### **Appendix**

The OACIS Investigators



1  
2  
3  
4  
5  
6 Chair: Issei Komuro, Department of Cardiovascular Medicine, Osaka University  
7

8  
9 Graduate School of Medicine, 2-2 Yamada-oka, Suita 565-0871, Japan  
10

11 Secretariats: Yasuhiko Sakata (Chief), Daisaku Nakatani, Shinichiro Suna,  
12

13  
14 Masaya Usami, Sen Matsumoto, Masahiko Hara, Mariko Kishida, Rie Nagai:  
15

16  
17 Department of Cardiovascular Medicine, Osaka University Graduate School of  
18

19  
20 Medicine, Suita, Japan  
21

22  
23 Investigators (institutions listed in alphabetical order):  
24

25  
26 Yoshiyuki Kijima, Yusuke Nakagawa, Minoru Ichikawa, Higashi-Osaka City  
27

28  
29 General Hospital, Higashi-Osaka, Japan; Young-Jae Lim, Shigeo Kawano,  
30

31  
32 Kawachi General Hospital, Higashi-Osaka, Japan; Hiroshi Sato, Kwasnsei  
33

34  
35 Gakuin University, Nishinomiya, Japan; Takashi Shimazu, Hisakazu Fuji,  
36

37  
38 Kazuhiro Aoki, Kobe Ekisaikai Hospital, Kobe, Japan; Seiki Nagata, Yoshio  
39

40  
41 Ishida, Masaaki Uematsu, Tetsuya Watanabe, Masashi Fujita, Masaki Awata,  
42

43  
44 Kansai Rosai Hospital, Amagasaki, Japan; Michio Sugii, Meiwa Hospital,  
45

46  
47 Nishinomiya, Japan; Masatake Fukunami, Takahisa Yamada, Takashi Morita,  
48

49  
50 Osaka General Medical Center, Osaka, Japan; Shinji Hasegawa, Nobuyuki  
51

52  
53 Ogasawara, Osaka Kosei Nenkin Hospital, Osaka, Japan; Tatsuya Sasaki,  
54

55  
56 Yoshinori Yasuoka, Osaka Minami Medical Center, National Hospital  
57  
58  
59  
60

1  
2  
3  
4  
5  
6 Organization, Kawachinagano, Japan; Hideo Kusuoka, Yukihiro Koretsune,  
7  
8  
9 Yoshio Yasumura, Keiji Hirooka, Osaka Medical Center, National Hospital  
10  
11  
12 Organization, Osaka, Japan; Masatsugu Hori (previous Chair), Osaka  
13  
14 Prefectural Hospital Organization Osaka Medical Center for Cancer and  
15  
16 Cardiovascular Diseases; Kazuhisa Kodama, Yasunori Ueda, Kazunori  
17  
18 Kashiwase, Akio Hirata, Mayu Nishio, Mitsutoshi Asai, Osaka Police Hospital,  
19  
20  
21 Osaka, Japan; Yoshio Yamada, Jun Tanouchi, Masami Nishino, Hiroyasu Kato,  
22  
23  
24 Ryu Shutta, Osaka Rosai Hospital, Sakai, Japan; Shintaro Beppu, Akio Kohama,  
25  
26  
27 Hiroyoshi Yamamoto, Osaka Seamens Insurance Hospital, Osaka, Japan; Issei  
28  
29  
30 Komuro, Shinsuke Nanto, Kinya Otsu, Yasushi Matsumura, Kazuhiro Yamamoto,  
31  
32  
33 Tetsuo Minamino, Satoru Sumitsuji, Yasuhiko Sakata, Shungo Hikoso, Daisaku  
34  
35  
36 Nakatani, Osaka University Graduate School of Medicine, Suita, Japan; Toru  
37  
38  
39 Hayashi, Yasuji Doi, Ken-ichiro Okada, Noritoshi Ito, Saiseikai Senri Hospital,  
40  
41  
42 Suita, Japan; Kenshi Fujii, Katsuomi Iwakura, Atsushi Okamura, Motoo Date,  
43  
44  
45 Yoshiharu Higuchi, Sakurabashi Watanabe Hospital, Osaka, Japan; Noriyuki  
46  
47  
48 Akehi, Settsu Iseikai Hospital, Settsu, Japan; Eiji Hishida, Teramoto Memorial  
49  
50  
51 Hospital, Kawachinagano, Japan; and Shiro Hoshida, Kazuhiko Hashimura,  
52  
53  
54 Takayoshi Adachi, Yao Municipal Hospital, Yao, Japan.  
55  
56  
57  
58  
59  
60

## References

1. Muller JE, Stone PH, Turi ZG, et al. Circadian Variation in the Frequency of Onset of Acute Myocardial Infarction. *N Engl J Med.* 1985;313:1315-22.
2. Mahmoud KD, Lennon RJ, Ting HH, et al. Circadian variation in coronary stent thrombosis. *JACC Cardiovasc Interv.* 2011;4:183-90.
3. Muller JE, Tofler GH, Stone PH. Circadian variation and triggers of onset of acute cardiovascular disease. *Circulation.* 1989;79:733-43.
4. Kinjo K, Sato H, Sato H, et al; Osaka Acute Coronary Insufficiency Study (OACIS) Group. Circadian variation of the onset of acute myocardial infarction in the Osaka area, 1998-1999: characterization of morning and nighttime peaks. *Jpn Circ J.* 2001;65:617-20.
5. Peters RW, Zoble RG, Liebson PR, et al. Identification of a secondary peak in myocardial infarction onset 11 to 12 hours after awakening: the Cardiac Arrhythmia Suppression Trial (CAST) experience. *J Am Coll Cardiol.*

1  
2  
3  
4  
5  
6 1993;22:998-1003.  
7  
8  
9

10  
11 6. Itaya H, Takagi T, Sugi K, et al. Contents of second peak in the circadian  
12 variation of acute myocardial infarction in the Japanese population. *J Cardiol.*  
13  
14 2012;59:147-53.  
15  
16  
17  
18  
19

20  
21  
22  
23 7. Tsukada T, Ikeda T, Ishiguro H, et al. Circadian variation in out-of-hospital  
24 cardiac arrests due to cardiac cause in a Japanese patient population. *Circ J.*  
25  
26 2010;74:1880-7.  
27  
28  
29  
30  
31

32  
33  
34  
35 8. Willich SN, Löwel H, Lewis M, et al. Weekly variation of acute myocardial  
36 infarction. Increased Monday risk in the working population. *Circulation.*  
37  
38 1994;90:87-93.  
39  
40  
41  
42  
43  
44  
45

46  
47 9. Hara M, Sakata Y, Nakatani D, et al; Osaka Acute Coronary Insufficiency  
48 Study (OACIS) Investigators. Low levels of serum n-3 polyunsaturated fatty  
49 acids are associated with worse heart failure-free survival in patients after acute  
50 myocardial infarction. *Circ J.* 2013;1:153-162.  
51  
52  
53  
54  
55  
56  
57  
58  
59  
60

- 1  
2  
3  
4  
5  
6  
7  
8  
9 10. Nakatani D, Sakata Y, Suna S, et al; Osaka Acute Coronary Insufficiency  
10  
11 Study (OACIS) Investigators. Impact of beta blockade therapy on long-term  
12  
13 mortality after ST-segment elevation acute myocardial infarction in the  
14  
15 percutaneous coronary intervention era. *Am J Cardiol.* 2013;111:457-464.  
16  
17  
18  
19  
20  
21  
22  
23 11. Gao F, Chia KS, Krantz I, et al. On the application of the von Mises  
24  
25 distribution and angular regression methods to investigate the seasonality of  
26  
27 disease onset. *Stat Med.* 2006;25:1593-618.  
28  
29  
30  
31  
32  
33  
34  
35 12. Stergiou GS, Vemmos KN, Pliarchopoulou KM, et al. Parallel morning and  
36  
37 evening surge in stroke onset, blood pressure, and physical activity. *Stroke.*  
38  
39 2002;33:1480-6.  
40  
41  
42  
43  
44  
45  
46 13. Degaute JP, van de Borne P, Linkowski P, et al. Quantitative analysis of the  
47  
48 24-hour blood pressure and heart rate patterns in young men. *Hypertension.*  
49  
50 1991;18:199-210.  
51  
52  
53  
54  
55  
56  
57  
58  
59  
60

- 1  
2  
3  
4  
5  
6 14. Kotsis V, Stabouli S, Bouldin M, et al. Impact of obesity on 24-hour  
7  
8 ambulatory blood pressure and hypertension. *Hypertension*. 2005;45:602-7.  
9  
10  
11  
12  
13  
14 15. Thrall G, Lane D, Carroll D, et al. A systematic review of the prothrombotic  
15  
16 effects of an acute change in posture: a possible mechanism underlying the  
17  
18 morning excess in cardiovascular events? *Chest*. 2007;132:1337-47.  
19  
20  
21  
22  
23  
24  
25  
26 16. Tofler GH, Brezinski D, Schafer AI, et al. Concurrent morning increase in  
27  
28 platelet aggregability and the risk of myocardial infarction and sudden cardiac  
29  
30 death. *N Engl J Med*. 1987;316:1514-8.  
31  
32  
33  
34  
35  
36  
37  
38 17. Andreotti F, Davies GJ, Hackett DR, et al. Major circadian fluctuations in  
39  
40 fibrinolytic factors and possible relevance to time of onset of myocardial  
41  
42 infarction, sudden cardiac death and stroke. *Am J Cardiol*. 1988;62:635-7.  
43  
44  
45  
46  
47  
48  
49 18. Tofler GH, Muller JE. Triggering of acute cardiovascular disease and  
50  
51 potential preventive strategies. *Circulation*. 2006;114:1863-72.  
52  
53  
54  
55  
56  
57  
58  
59  
60

1  
2  
3  
4  
5  
6 19. Hokanson JE, Austin MA. Plasma triglyceride level is a risk factor for  
7  
8 cardiovascular disease independent of high-density lipoprotein cholesterol level:  
9  
10 a meta-analysis of population-based prospective studies. J Cardiovasc Risk.  
11  
12 1996;3:213-9.  
13  
14  
15  
16  
17  
18  
19

20 20. Iso H, Naito Y, Sato S, et al. Serum triglycerides and risk of coronary heart  
21  
22 disease among Japanese men and women. Am J Epidemiol. 2001;153:490-9.  
23  
24  
25  
26  
27  
28

29 21. Masuda D, Sugimoto T, Tsujii K, et al. Correlation of fasting serum  
30  
31 apolipoprotein B-48 with coronary artery disease prevalence. Eur J Clin Invest.  
32  
33 2012;42:992-9.  
34  
35  
36  
37  
38  
39

40 22. Stampfer MJ, Krauss RM, Ma J, et al. A prospective study of triglyceride level,  
41  
42 low-density lipoprotein particle diameter, and risk of myocardial infarction. JAMA.  
43  
44 1996;276:882-8.  
45  
46  
47  
48  
49  
50

51  
52 23. Nordestgaard BG, Benn M, Schnohr P, et al. Nonfasting triglycerides and risk  
53  
54 of myocardial infarction, ischemic heart disease, and death in men and women.  
55  
56  
57  
58  
59  
60

1  
2  
3  
4  
5  
6 JAMA. 2007;298:299-308.  
7  
8  
9

10  
11 24. No authors listed. Hypertriglyceridaemia and vascular risk. Report of a  
12 meeting of physicians and scientists, University College London Medical School.  
13  
14  
15  
16  
17 Lancet. 1993;342:781-7.  
18  
19

20  
21  
22  
23 25. Rosenson RS, Lowe GD. Effects of lipids and lipoproteins on thrombosis and  
24  
25  
26  
27  
28  
29  
30  
31  
32  
33  
34  
35  
36  
37  
38  
39  
40  
41  
42  
43  
44  
45  
46  
47  
48  
49  
50  
51  
52  
53  
54  
55  
56  
57  
58  
59  
60

26. Hamsten A, Wiman B, de Faire U, et al. Increased plasma levels of a rapid  
inhibitor of tissue plasminogen activator in young survivors of myocardial  
infarction. N Engl J Med. 1985;313:1557-63.

27. Mehta J, Mehta P, Lawson D, et al. Plasma tissue plasminogen activator  
inhibitor levels in coronary artery disease: correlation with age and serum  
triglyceride concentrations. J Am Coll Cardiol. 1987;9:263-8.

28. Eriksson P, Nilsson L, Karpe F, et al. Very-low-density lipoprotein response



1  
2  
3  
4  
5  
6 element in the promoter region of the human plasminogen activator inhibitor-1  
7  
8  
9 gene implicated in the impaired fibrinolysis of hypertriglyceridemia. *Arterioscler*  
10  
11  
12 *Thromb Vasc Biol.* 1998;18:20-6.

13  
14  
15  
16  
17 29. Mitropoulos KA, Miller GJ, Reeves BE, et al. Factor VII coagulant activity is  
18  
19  
20 strongly associated with the plasma concentration of large lipoprotein particles in  
21  
22  
23 middle-aged men. *Atherosclerosis.* 1989;76:203-8.

24  
25  
26  
27  
28  
29 30. Bruckert E, Carvalho de Sousa J, Giral P, et al. Interrelationship of plasma  
30  
31  
32 triglyceride and coagulant factor VII levels in normotriglyceridemic  
33  
34  
35 hypercholesterolemia. *Atherosclerosis.* 1989;75:129-34.

36  
37  
38  
39  
40 31. Rosenson RS, Shott S, Tangney CC. Hypertriglyceridemia is associated with  
41  
42  
43 an elevated blood viscosity Rosenson: triglycerides and blood viscosity.  
44  
45  
46  
47 *Atherosclerosis.* 2002;161:433-9.

48  
49  
50  
51  
52 32. Hamsten A, de Faire U, Walldius G, et al. Plasminogen activator inhibitor in  
53  
54  
55 plasma: risk factor for recurrent myocardial infarction. *Lancet.* 1987;2:3-9.  
56  
57  
58

- 1  
2  
3  
4  
5  
6  
7  
8  
9 33. Meade TW, Mellows S, Brozovic M, et al. Haemostatic function and  
10  
11 ischaemic heart disease: principal results of the Northwick Park Heart Study.  
12  
13 Lancet. 1986;2:533-7.  
14  
15  
16  
17  
18  
19  
20 34. Lowe GD, Lee AJ, Rumley A, et al. Blood viscosity and risk of cardiovascular  
21  
22 events: the Edinburgh Artery Study. Br J Haematol. 1997;96:168-73.  
23  
24  
25  
26  
27  
28  
29 35. Lundman P, Eriksson M, Schenck-Gustafsson K, et al. Transient  
30  
31 triglyceridemia decreases vascular reactivity in young, healthy men without risk  
32  
33 factors for coronary heart disease. Circulation. 1997;96:3266-8.  
34  
35  
36  
37  
38  
39  
40 36. Kugiyama K, Doi H, Motoyama T, et al. Association of remnant lipoprotein  
41  
42 levels with impairment of endothelium-dependent vasomotor function in human  
43  
44 coronary arteries. Circulation. 1998;97:2519-26.  
45  
46  
47  
48  
49  
50  
51  
52 37. Zeiher AM, Drexler H, Saubier B, et al. Endothelium-mediated coronary  
53  
54 blood flow modulation in humans. Effects of age, atherosclerosis,  
55  
56  
57  
58  
59  
60

1  
2  
3  
4  
5  
6 hypercholesterolemia, and hypertension. *J Clin Invest.* 1993;92:652-62.  
7  
8  
9

10  
11 38. Rivera-Coll A, Fuentes-Arderiu X, Díez-Noguera A. Circadian rhythmic  
12 variations in serum concentrations of clinically important lipids. *Clin Chem.*  
13 1994;40:1549-53.  
14  
15  
16  
17  
18  
19

20  
21 39. Kario K, Yano Y, Matsuo T, et al. Additional impact of morning haemostatic  
22 risk factors and morning blood pressure surge on stroke risk in older Japanese  
23 hypertensive patients. *Eur Heart J.* 2011;32:574-80.  
24  
25  
26  
27  
28  
29

30  
31 40. Richards J, Gumz ML. Advances in understanding the peripheral circadian  
32 clocks. *FASEB J.* 2012;26:3602-13.  
33  
34  
35  
36  
37  
38

39  
40 41. Kohsaka A, Waki H, Cui H, et al. Integration of metabolic and  
41 cardiovascular diurnal rhythms by circadian clock. *Endocr J.* 2012;59:447-56.  
42  
43  
44  
45  
46  
47  
48

49  
50 42. Manfredini R, Boari B, Bressan S, et al. Influence of circadian rhythm on  
51 mortality after myocardial infarction: data from a prospective cohort of  
52  
53  
54  
55  
56  
57  
58

1  
2  
3  
4  
5  
6 emergency calls. Am J Emerg Med. 2004;22:555-9.  
7  
8  
9

10  
11 43. Bae MH, Ryu HM, Lee JH, et al. The impact of circadian variation on  
12 12-month mortality in patients with acute myocardial infarction. Korean Circ J.  
13  
14 2010;40:616-24.  
15  
16  
17  
18  
19

20  
21 44. Holmes DR Jr, Aguirre FV, Aplin R, et al. Circadian rhythms in patients with  
22 ST-elevation myocardial infarction. Circ Cardiovasc Qual Outcomes.  
23  
24 2010;3:382-9.  
25  
26  
27  
28  
29  
30  
31  
32  
33  
34  
35  
36  
37  
38  
39  
40  
41  
42  
43  
44  
45  
46  
47  
48  
49  
50  
51  
52  
53  
54  
55  
56  
57  
58  
59  
60

**Table 1.** Demographics and clinical characteristics of the study population

|                                     | N=7755           |
|-------------------------------------|------------------|
| <b>Patients</b>                     |                  |
| Age (years)                         | 66 (57-74)       |
| Male (%)                            | 5872 (75.7)      |
| Job (%)                             | 3364 (48.2)      |
| BMI (kg/m <sup>2</sup> )            | 23.4 (21.4-25.7) |
| <b>Cardiovascular risk factors</b>  |                  |
| Smoker (%)                          | 4865 (63.9)      |
| Drinker (%)                         | 3321 (45.3)      |
| Diabetes (%)                        | 2586 (33.4)      |
| Hypertension (%)                    | 4424 (58.9)      |
| Dyslipidemia (%)                    | 3259 (44.1)      |
| Previous MI (%)                     | 983 (13.0)       |
| Angina pectoris (%)                 | 1737 (23.4)      |
| Multivessel disease (%)             | 2790 (38.4)      |
| Collateral circulation (%)          | 2576 (35.7)      |
| <b>Clinical presentation</b>        |                  |
| Onset admission time<24h(%)         | 6804 (89.1)      |
| Killip ≥ II (%)                     | 1331 (18.0)      |
| Initial TIMI ≤ II (%)               | 4759 (68.4)      |
| STEMI (%)                           | 6567 (86.0)      |
| <b>Laboratory data on admission</b> |                  |
| Blood glucose level (mg/dl)         | 152 (122-209)    |
| HDL cholesterol (mg/dl)             | 44 (37-53)       |
| LDL cholesterol (mg/dl)             | 121 (99-147)     |
| Triglycerides (mg/dl)               | 92 (58-142)      |
| HbA1c (%)                           | 5.9 (5.5-6.9)    |
| Peak CK (IU/l)                      | 2147 (1069-4006) |
| eGFR (ml/min/1.73 m <sup>2</sup> )  | 64.5 (49.2-80.9) |
| <b>Localization of MI</b>           |                  |
| LAD                                 | 3050 (41.7)      |
| RCA                                 | 2447 (33.4)      |
| LCX                                 | 998 (13.6)       |

LMT

164 (2.2)

---

BMI = body mass index; MI = myocardial infarction; STEMI = ST-elevation myocardial infarction; HDL = high density lipoprotein; LDL = low density lipoprotein; TG = triglyceride ; HbA1c = hemoglobin A1c; CK = creatinine phosphokinase; eGFR = estimated glomerular filtration rate; LAD = left anterior descending artery; LCX = left circumflex artery; LMT = left main trunk; RCA = right coronary artery. Categorical variables are presented as number (percentage), and continuous variables are presented as quartile. Laboratory data were measured on admission. Smoker was defined as patients with smoking history, and drinker was defined as active drinker. Number (percentage) of Localization of MI was calculated out of 7319 patients who underwent coronary angiography.

## Figure legends

### Figure 1. Circadian pattern of AMI onset in the overall population.

A circadian pattern of AMI onset in the overall population was clearly observed in a circular plot (A) and histogram (B). The solid line corresponds to the fitted von Mises distribution, and the dots with error bars are the estimated peak onset times and 95% confidence intervals (CI), respectively.

### Figure 2. Circadian pattern of AMI onset according to day of the week.

Circadian patterns of AMI onset based on the day of the week are shown. The estimated peak onset time and 95% CIs are shown below each circular plot.

\* P values from the likelihood ratio (LR) test to examine whether the circadian pattern of AMI onset was uniform, unimodal, or bimodal.

### Figure 3. Circadian pattern of AMI onset based on lifestyle-related factors.

(A) Circular plots of the circadian pattern of AMI onset in the subpopulation with TG levels  $\geq 150$  and  $< 150$  mg/dl, and the circular plot of the corresponding fitted von Mises distributions for each subgroup are shown. (B)-(M) Circular plots of

1  
2  
3  
4  
5  
6 the fitted von Mises distributions of each subgroup based on smoking habit, age,  
7  
8  
9 drinking habit, BG levels, gender, and working status, LDL levels, HDL levels,  
10  
11  
12 Hba1c levels, Hypertension, Diabetes and Dyslipidemia.

13  
14  
15 \* P values from the LR test to examine whether the circadian pattern of AMI  
16  
17  
18 onset was uniform, unimodal, or bimodal in each subgroup.

19  
20  
21 † P values from the hierarchical LR test to examine whether each factor affected  
22  
23  
24 the circadian pattern of AMI onset.

25  
26  
27  
28  
29 **Figure 4 . One-year mortality according to the onset time of AMI onset**

30  
31  
32 **(A) One-year mortality among the four subgroups based on AMI onset time.**

33  
34  
35 **(B) Hazard ratios (HRs) for one-year mortality in the afternoon-onset group**  
36  
37  
38 **versus the other three onset-time groups.**

39  
40  
41 Kaplan-Meier survival curves of one-year mortality among the four AMI onset  
42  
43  
44 time subgroups (A). A p value from the log-rank test was used to examine  
45  
46  
47 difference in the Kaplan-Meier curves. HR and 95%CI, and p value for the  
48  
49  
50 overall population was calculated using univariable Cox regression analysis. The  
51  
52  
53 HRs and 95%CIs, and p values for the individual potential confounding variables  
54  
55  
56 were calculated using stratified Cox regression analysis, in which the variables  
57  
58  
59  
60



1  
2  
3  
4  
5  
6 were included into the model as stratification factors (B).  
7  
8  
9

10  
11 **eFigure 1. Circadian pattern of AMI onset according to day of the week in**  
12 **the subpopulation with admission serum TG  $\geq 150$  and  $< 150$  mg/dl.**  
13

14  
15  
16  
17 Circular plots of the fitted von Mises distributions for the subpopulation with  
18 admission serum TG  $\geq 150$  and  $< 150$  mg/dl according to the day of the week are  
19  
20  
21 shown.  
22  
23  
24

25  
26 \* P values from the LR test to examine whether the circadian pattern of AMI  
27  
28 onset was uniform, unimodal, or bimodal in each subgroup.  
29  
30  
31

32  
33  
34  
35 **eFigure 2. Circadian distribution of serum TG levels on admission**  
36 **according to AMI onset time.**  
37

38  
39  
40 Circadian distribution of serum TG levels on admission based on AMI onset time  
41  
42 is shown. Red solid line represents the model of circadian distribution of serum  
43  
44 TG levels on admission fitted by Cosinor-analysis, and blue dot line represents  
45  
46 no circadian change.  
47  
48  
49

50  
51  
52 \* P-value from F-test for the existence of a rhythm (amplitude) to examine  
53  
54 whether the amplitude of serum TG levels on admission in patients with AMI had  
55  
56  
57  
58

1  
2  
3  
4  
5  
6  
7  
8  
9  
10  
11  
12  
13  
14  
15  
16  
17  
18  
19  
20  
21  
22  
23  
24  
25  
26  
27  
28  
29  
30  
31  
32  
33  
34  
35  
36  
37  
38  
39  
40  
41  
42  
43  
44  
45  
46  
47  
48  
49  
50  
51  
52  
53  
54  
55  
56  
57  
58  
59  
60

circadian variation or not.

For peer review only

**Association** of Lifestyle-related Factors **with** Circadian Onset

Patterns of Acute Myocardial Infarction: a Prospective Observational  
Study in Japan

Ryuya Eda<sup>1)2)</sup>, Yasuhiko Sakata, MD, PhD<sup>1)3)4)</sup>, Daisaku Nakatani, MD, PhD

<sup>1)</sup>, Shinichiro Suna, MD, PhD<sup>1)</sup>, Masaya Usami, MD<sup>1)</sup>, Sen Matsumoto, MD<sup>1)</sup>,

Masahiko Hara, MD<sup>1)</sup>, Tetsuhisa Kitamura, MD, MSc, DrPH<sup>5)</sup>, Hiroshi Sato, MD,

PhD<sup>6)</sup>, Shizuya Yamashita, MD, PhD<sup>1)7)</sup>, Shinsuke Nanto, MD, PhD<sup>1)3)</sup>, Shungo

Hikoso, MD, PhD<sup>1)</sup>, Yasushi Sakata, MD, PhD<sup>1)</sup>, Masatsugu Hori, MD, PhD<sup>8)</sup>,

Toshimitsu Hamasaki, PhD<sup>2)</sup>, Issei Komuro, MD, PhD<sup>1)9)</sup>, on behalf of the OACIS

Investigators

1: Department of Cardiovascular Medicine, Osaka University Graduate School of

Medicine, Suita, Japan; 2: Department of Biomedical Statistics, Osaka University

Graduate School of Medicine, Suita, Japan; 3: Department of Advanced

Cardiovascular Therapeutics, Osaka University Graduate School of Medicine,

Suita, Japan; 4: Department of Cardiovascular Medicine, Tohoku University

Graduate School of Medicine, Sendai, Japan; 5: Department of Social and

1  
2  
3  
4  
5  
6 Environmental Medicine, Osaka University Graduate School of Medicine, Suita,  
7  
8  
9 Japan; 6: School of Human Welfare Studies Health Care Center and Clinic,  
10  
11  
12 Kwansei Gakuin University, Nishinomiya, Japan; 7: Department of Community  
13  
14  
15 Medicine, Osaka University Graduate School of Medicine, Suita, Japan; 8:  
16  
17  
18 Osaka Prefectural Hospital Organization Osaka Medical Center for Cancer and  
19  
20  
21 Cardiovascular Diseases, Osaka, Japan; 9: Department of Cardiovascular  
22  
23  
24 Medicine, University of Tokyo Graduate School of Medicine, Tokyo, Japan  
25  
26  
27  
28

29 Short title: AMI Onset Patterns and Lifestyle-related Factors  
30  
31  
32  
33  
34

35 Total word count of the text: 3572 words  
36  
37  
38  
39  
40  
41  
42  
43  
44  
45  
46  
47  
48  
49  
50  
51  
52  
53  
54  
55  
56  
57  
58  
59  
60

#### Disclosure

Dr. Komuro has received research grants and speaker's fees from Takeda  
Pharmaceutical Company, Astellas Pharma, DAIICHI SANKYO COMPANY,  
Boehringer Ingelheim, Novartis Pharma and Shionogi. No other authors have  
relationships with industry to disclose or financial associations that might pose a  
conflict of interest in connection with the submitted article.

1  
2  
3  
4  
5  
6  
7  
8  
9 Sources of funding

10  
11 This work was supported by Grants-in-Aid for University and Society

12  
13 Collaboration (#19590816 and #19390215) from the Japanese Ministry of

14  
15  
16  
17 Education, Culture, Sports, Science and Technology, Tokyo, Japan.

18  
19  
20  
21  
22  
23 Address for correspondence:

24  
25  
26 Yasuhiko Sakata, MD, PhD

27  
28  
29 Department of Cardiovascular Medicine

30  
31  
32 Osaka University Graduate School of Medicine

33  
34  
35 2-2 Yamada-oka, Suita, 565-0871, Japan.

36  
37  
38 Tel: +81-6-6879-6612, Fax: +81-6-6879-6613,

39  
40  
41 E-mail: sakatayk@cardiology.med.osaka-u.ac.jp

## Abstract

**Objective:** The onset of acute myocardial infarction (AMI) shows characteristic circadian variations involving a definite morning peak and less-defined nighttime peak. However, the factors influencing circadian patterns of AMI onset and their influence on morning and nighttime peaks have not been fully elucidated.

**Design, Setting, and Participants:** An analysis of patients registered between 1998 and 2008 in the Osaka Acute Coronary Insufficiency Study, which is a prospective, multicenter observational study of AMI patients in the Osaka region of Japan. The present study included 7755 consecutive patients with a known time of AMI onset.

**Main Outcomes and Measures:** A mixture of two von Mises distributions was used to examine whether a circadian pattern of AMI had uniform, unimodal, or bimodal distribution, and the likelihood ratio test was then used to select the best circadian pattern among them. The hierarchical likelihood ratio test was used to identify factors affecting the circadian patterns of AMI onset. The Kaplan-Meier

1  
2  
3  
4  
5  
6 method was used to estimate survival curves of one-year mortality according to  
7  
8  
9 AMI onset time.

10  
11  
12  
13  
14 **Results:** The overall population had a bimodal circadian pattern of AMI onset  
15  
16 characterized by a high and sharp morning peak and a lower and less-defined  
17  
18 nighttime peak (bimodal:  $p < 0.001$ ). Although several lifestyle-related factors had  
19  
20 a statistically significant association with the circadian patterns of AMI onset,  
21  
22 serum triglyceride levels had the most prominent association with circadian  
23  
24 patterns of AMI onset. Patients with triglyceride  $\geq 150$  mg/dl on admission had  
25  
26 only one morning peak in the circadian pattern of AMI onset during the  
27  
28 weekdays, with no peaks detected on weekends, whereas all other subgroups  
29  
30 had two peaks throughout the week.  
31  
32  
33  
34  
35  
36  
37  
38  
39  
40  
41  
42

43  
44 **Conclusions:** The circadian pattern of AMI onset was characterized by  
45  
46 bimodality. Notably, several lifestyle-related factors, particularly serum  
47  
48 triglyceride levels, had a strong relation with the circadian pattern of AMI onset.  
49  
50  
51  
52  
53  
54  
55  
56  
57  
58  
59  
60

### Strengths and limitations of this study

- We comprehensively analyzed the circadian patterns of AMI onset in a large, multicenter cohort of patients in relation to patient characteristics, lifestyle factors, and day of the week.
- A mixture of two von Mises distributions revealed that the circadian pattern of AMI onset exhibited bimodality.
- Several lifestyle-related factors were shown to be associated with circadian patterns of AMI onset, depending on the day of the week. In particular, it was demonstrated that elevated serum triglyceride levels on admission accentuated morning peak of AMI onset during the weekdays.
- Subjects were limited to those who were hospitalized for AMI.
- Laboratory data were evaluated on admission.



## Introduction

Onset patterns of acute myocardial infarction (AMI) exhibit circadian variation that is characterized by an increased frequency in the morning and a secondary peak incidence at nighttime.<sup>1</sup> Several studies have confirmed that AMI onset exhibits a bimodal circadian pattern, with peaks occurring in the morning hours<sup>2-4</sup> and nighttime hours.<sup>1,4-7</sup> However, it is not well understood what factors, particularly among lifestyle-related factors, influence the circadian patterns of AMI. Moreover, although these patterns appear to vary according to the day of the week,<sup>8</sup> it is unclear how circadian patterns of AMI onset vary throughout the week, particularly, in association with socioeconomic factors.

Because AMI and subsequent ischemic heart failure are the leading causes of death in both developed and developing countries, primary prevention of AMI is a major healthcare issue worldwide. Accordingly, identifying potential factors influencing the circadian pattern of AMI may help in the clinical management of patients for preventing the onset of AMI.

In the present study, we comprehensively analyzed the circadian patterns of AMI onset in a large, multicenter cohort of patients in relation to patient characteristics, lifestyle factors, and day of the week.

## Methods

### OACIS registry and study subjects

The OACIS is a prospective, multicenter observational study collecting demographic, procedural, biological, and outcome data as well as blood samples from AMI patients hospitalized at 25 collaborating hospitals from the Osaka region of Japan (UMIN-Clinical Trial Registry ID: UMIN000004575).<sup>9-10</sup> A diagnosis of AMI was made if the patient fulfilled at least two of the following three criteria; 1) history of central chest pressure, pain, or tightness lasting 30 min, (2) typical electrocardiographic changes (i.e., ST-segment elevation  $\geq 0.1$  mV in 1 standard limb lead or 2 precordial leads, ST-segment depression  $\geq 0.1$  mV in 2 leads, abnormal Q waves, or T-wave inversion in 2 leads), and (3) an increase in serum creatine kinase levels of two times the upper normal limit in each hospital. All the collaborating hospitals were encouraged to enroll consecutive patients with AMI.

We prospectively collected data by research cardiologists and trained research nurses using a specific reporting form, and the following variables were

1  
2  
3  
4  
5  
6 extracted from the OACIS registry database: age, gender, working status, body  
7  
8  
9 mass index (BMI), coronary risk factors (diabetes, hypertension, dyslipidemia,  
10  
11  
12 smoking, drinking, previous myocardial infarction, multi-vessel disease, and  
13  
14 collateral circulation), clinical presentation on admission (KILLIP classification,  
15  
16 initial TIMI flow, and ST-elevation myocardial infarction), coronary angiography  
17  
18 data, reperfusion therapy, laboratory data on admission (hemoglobin A1c, total  
19  
20 cholesterol, low- and high-density lipoprotein cholesterol, triglyceride, and  
21  
22 estimated glomerular filtration rate) and medications at discharge (RAS  
23  
24 inhibitors, beta-blocker, calcium channel blocker, statin, anti-platelet agent, and  
25  
26 diuretics). Diabetes mellitus was defined as fasting plasma glucose  $\geq 126$  mg/dl,  
27  
28 hemoglobin A1c  $\geq 6.5\%$  or a history of anti-diabetic therapy. Hypertension was  
29  
30 defined as a history of systolic blood pressure  $\geq 140$  mmHg, diastolic blood  
31  
32 pressure  $\geq 90$  mmHg, or antihypertensive therapy. Dyslipidemia was defined as  
33  
34 fasting total cholesterol  $\geq 220$  mg/dl, low-density lipoprotein cholesterol  $\geq 140$   
35  
36 mg/dl, high-density lipoprotein cholesterol  $\leq 40$  mg/dl, fasting triglycerides  $\geq 150$   
37  
38 mg/dl, or lipid-lowering therapy.  
39  
40  
41  
42  
43  
44  
45  
46  
47  
48  
49  
50

51  
52 The study protocol has been approved by the ethics committee of each  
53  
54  
55 participating hospital. All in-hospital data were obtained after written informed  
56  
57  
58  
59  
60

1  
2  
3  
4  
5  
6 consent and were then transmitted to the data collection center at the  
7  
8  
9 Department of Cardiovascular Medicine, Osaka University Graduate School of  
10  
11  
12 Medicine, Suita, Japan for processing and analysis. The corresponding authors  
13  
14  
15 had full access and validated to all data in the study.

16  
17  
18 In the present study, we analyzed 7755 AMI patients whose time of AMI onset  
19  
20  
21 was definitely identified among the 8603 consecutive patients registered in the  
22  
23  
24 OACIS registry between 1998 and 2008. Patients' baseline characteristics are  
25  
26  
27 presented in Table 1.

### 32 **Statistical analysis**

33  
34  
35 Continuous variables were summarized as quartiles and were compared by the  
36  
37  
38 Wilcoxon rank sum test for two-group comparisons, and the Kruskal-Wallis test  
39  
40  
41 for four-group comparisons. Categorical variables were presented as number  
42  
43  
44 and percentage, and were compared by the chi-square test. A mixture of two von  
45  
46  
47 Mises distributions was used to examine whether a circadian pattern of AMI  
48  
49  
50 onset had uniform (no peak), unimodal (one peak), or bimodal distribution (two  
51  
52  
53 peaks), and the likelihood ratio test was then used to select the best circadian  
54  
55  
56 pattern among them.<sup>11</sup> In addition, the hierarchical likelihood ratio test was  
57  
58  
59  
60

1  
2  
3  
4  
5  
6 assessed to identify factors affecting the circadian patterns of AMI onset. The  
7  
8  
9 Kaplan-Meier method was used to estimate survival curves of one-year mortality  
10  
11  
12 according to AMI onset time (morning [6:00-11:59 h], afternoon [12:00-17:59 h],  
13  
14  
15 evening [18:00-23:59 h], and nighttime [0:00-5:59 h]). The log-rank test was  
16  
17  
18 used to compare survival curves between the groups, and the Cox proportional  
19  
20  
21 hazards regression model was used to estimate hazard ratios and 95%  
22  
23  
24 confidence intervals (CI). To reduce potential confounding effects due to patient  
25  
26  
27 background variability in the comparison between the afternoon-onset and other  
28  
29  
30 groups, a stratified Cox proportional hazards regression model was used, in  
31  
32  
33 which the potential confounding variables were included into the model as  
34  
35  
36 stratification factors. **Cosinor-analysis was used to estimate the amplitude of**  
37  
38 **serum TG levels on admission according to AMI onset time. Then, F-test for the**  
39  
40 **existence of a rhythm (amplitude) was used to examine whether the amplitude of**  
41  
42 **serum TG levels on admission in patients with AMI had circadian variation or not.**  
43  
44  
45  
46 Statistical significance was set as  $p < 0.05$ . All statistical analyses were performed  
47  
48  
49 using an in-house validated Fortran program or SAS version 9.3 (SAS Institute  
50  
51  
52 Inc., Cary, NC).  
53  
54  
55  
56  
57  
58  
59  
60

## Results

### Bimodal circadian patterns of AMI onset in the overall population

The daily patterns of AMI onset in our cohort of 7755 patients were first analyzed using the likelihood ratio test (Figure 1). In the overall population, AMI onset clearly exhibited a circadian pattern consisting of two peaks (bimodal:  $p < 0.001$ ): a primary peak at 9:01 h (95%CI: 8:53-9:08 h) and a secondary peak at 20:11 h (95%CI: 19:48-20:34 h). The primary peak was more clearly defined than the secondary peak in both the circular and columnar histograms (Figure 1A and 1B, respectively).

Likelihood ratio test analysis revealed that the peak time of AMI onset varied according to the day of the week (Figure 2). For example, the primary peak onset time was earliest on Monday (8:24 h [95%CI: 8:04-8:44 h]) and latest on Sunday (9:44 h [95%CI: 9:22-10:06 h]). On Tuesday, patients exhibited a circadian pattern of AMI onset characterized by late primary (9:28 h [95%CI: 9:06-9:51 h]) and secondary peak onset times (21:13 h [95%CI: 20:40-21:46 h]), whereas earlier peak onset times (8:43 h [95%CI: 8:15-9:10 h], and 19:09 h [95%CI: 18:23-19:55 h]) were detected on Thursday. Notably, the evening peak was higher, and sharper than the morning peak on Saturday (Figure 2).

### Factors affecting circadian patterns of AMI onset

Hierarchical likelihood ratio analysis revealed that serum TG levels on admission, smoking, age, drinking, blood glucose levels on admission, gender, and working status had a statistically significant association with the circadian pattern of AMI onset, whereas several other known risk factors for AMI, including HDL- and LDL-cholesterol, Hba1c, hypertension, diabetes and dyslipidemia were not related to the observed patterns (Figure 3, eTable 1).

Among the positively associated factors, serum TG levels on admission had the greatest association with the circadian pattern of AMI onset. Although the likelihood ratio test demonstrated that patients with admission serum TG levels of  $\geq 150$  mg/dl (N=1473) had the two characteristic peaks during the day, the peak pattern clearly differed from the other subpopulation groups. In patients with admission serum TG levels of  $\geq 150$  mg/d, both peaks occurred in the morning and nearly overlapped (8:18 h and 8:47 h) (Figure 3A). Therefore, the subpopulation with admission TG levels  $\geq 150$  mg/dl was considered to have a high frequency of AMI onset only in the morning.

The baseline characteristics and laboratory data of patients with serum

1  
2  
3  
4  
5  
6 TG levels of  $\geq 150$  and  $<150$  mg/dl on admission are shown in eTable 2. In the  
7  
8  
9 subpopulation with higher TG levels, the circadian patterns of AMI onset was  
10  
11 characterized by a large, sharp peak in the morning from Monday to Friday, but  
12  
13 no peaks were detected on Saturday and Sunday (bimodal:  $p=0.32$  and  $p=0.133$ ,  
14  
15 respectively) (eFigure 1). In contrast, patients with admission serum TG levels of  
16  
17  $<150$  mg/dl (N=5055) had onset peaks that occurred in the morning and evening  
18  
19 consistently throughout the week (eFigure 1).  
20  
21  
22  
23  
24

25  
26 A likelihood ratio test demonstrated that other all subpopulations had two  
27  
28 AMI onset peaks during the day: one in the morning and the other in the evening  
29  
30 (Figure 3, eTable 1). The subpopulations that were grouped according to  
31  
32 smoking habit, age  $< 65$  years old, male gender, and active employment had a  
33  
34 circadian pattern of AMI onset with a sharper primary peak and less-defined  
35  
36 sharp secondary peak compared to the other subpopulations (Figure 3B,C,F,G,  
37  
38 eTable1), although the peak heights were similar between the subpopulations,  
39  
40 with the exception of the smokers/nonsmokers subpopulations. The primary AMI  
41  
42 onset peak in the subpopulation of smokers was higher than that among  
43  
44 nonsmokers, whereas the secondary peaks were similar. Drinkers had a  
45  
46 circadian pattern of AMI onset that was characterized by a lower and less sharp  
47  
48  
49  
50  
51  
52  
53  
54  
55  
56  
57  
58  
59  
60



1  
2  
3  
4  
5  
6 peak in the morning, and a higher, sharper and later peak in the evening (9:00 h  
7  
8  
9 [95%CI: 8:48-9:13 h], 20:54 h [95%CI: 20:29-21:20 h]) compared to nondrinkers  
10  
11 (9:03 h [95%CI: 8:53-9:14 h], 19:27 h [95%CI: 18:50-20:04 h]) (Figure 3D,  
12  
13  
14 eTable1). The subpopulation with admission blood glucose  $\geq 140$  mg/dl exhibited  
15  
16 a circadian pattern of AMI onset with a higher and sharper primary peak and a  
17  
18 less-defined secondary peak compared to the subpopulation of AMI patients with  
19  
20 blood glucose  $< 140$  mg/dl on admission (Figure 3E).  
21  
22  
23  
24  
25  
26  
27  
28

### 29 **One-year mortality according to onset time of AMI**

30  
31  
32 One-year mortality was compared among four patient subpopulations that  
33  
34 were grouped according to the time range of AMI onset. The baseline  
35  
36 characteristics and laboratory data for the four groups are presented in eTable 3.  
37  
38 A total of 753 deaths were recorded during a median follow-up period of 365  
39  
40 days. Kaplan-Meier survival analysis demonstrated that the afternoon-onset  
41  
42 (12:00-17:59 h) group had worse 1-year mortality than the other 3 groups (log  
43  
44 rank test,  $p=0.032$ ) (Figure 4A). **In the subgroup of patients with ST-elevation**  
45  
46 **myocardial infarction (STEMI), the result was similar (log rank test,  $p=0.007$ ).**  
47  
48  
49  
50  
51  
52  
53  
54  
55 Univariable Cox regression analysis revealed that the HR of 1-year mortality in  
56  
57  
58  
59  
60

1  
2  
3  
4  
5  
6 the afternoon-onset group as compared to the other three groups was 1.20  
7  
8  
9 (95%CI 1.02-1.40,  $p=0.030$ , Figure 4B). This result did not generally change  
10  
11  
12 after stratification with potential confounding factors that showed a different trend  
13  
14  
15 between the afternoon-onset group and other three groups (Figure 4B).  
16  
17  
18  
19

## 20 **Discussion**

21  
22  
23 In the present study, we confirmed that AMI onset exhibits a circadian pattern  
24  
25 characterized by bimodality, with a definite morning peak and a less-defined  
26  
27 evening peak. Notably, several lifestyle-related factors were associated with  
28  
29 variation in the circadian pattern of AMI onset. In particular, serum TG levels on  
30  
31 admission for AMI were associated with a unique pattern of AMI onset that is  
32  
33 characterized by augmented unimodal peaks on weekday mornings, suggesting  
34  
35 that individual lifestyle may affect the onset pattern of AMI.  
36  
37  
38  
39  
40  
41  
42  
43  
44  
45  
46

### 47 **Bimodal pattern of AMI onset: morning and nighttime peaks**

48  
49 AMI onset in our large patient cohort generally followed a circadian pattern that  
50  
51 was characterized by a high and sharp morning peak and a lower and  
52  
53 less-defined sharp nighttime peak (Figure 1), a finding that is consistent with the  
54  
55  
56  
57  
58  
59  
60

1  
2  
3  
4  
5  
6 results of previous investigations.<sup>1-7</sup> Interestingly, the time of two peaks shifted in  
7  
8  
9 a synchronous fashion during the weekdays; the secondary peaks generally  
10  
11  
12 occurred around 11 to 12 h after the morning peaks on Monday through Friday  
13  
14 (Figure 2). For example, AMI onset exhibited early morning and nighttime peaks  
15  
16 on Monday and Thursday, whereas that on Tuesday exhibited late morning and  
17  
18 nighttime peaks. Although this finding is partly consistent with the observation of  
19  
20 Peters et al.,<sup>5</sup> who reported that a secondary peak in AMI onset occurs 11 to 12  
21  
22 h after waking, the present study firstly demonstrated that this synchrony was  
23  
24 present on the weekdays, but absent on the weekends.  
25  
26  
27  
28  
29  
30  
31

32 Several physiological processes are considered to contribute to the  
33  
34 bimodal pattern of AMI onset. For example, Stergiou et al.<sup>12</sup> demonstrated that  
35  
36 the two-peak diurnal variation in stroke onset occurs in parallel with variation in  
37  
38 blood pressure, pulse rate, and physical activity. Thus, the bimodality of blood  
39  
40 pressure and heart rate<sup>13-14</sup> is the most likely explanation for the circadian  
41  
42 patterns of AMI onset observed in the present study. A greater morning surge of  
43  
44 blood pressure and heart rate<sup>13</sup> may explain why the nighttime peak of AMI  
45  
46 onset was lower and less-defined than the morning peak. In addition, increased  
47  
48 blood viscosity<sup>15</sup> and thrombogenicity due to morning hypercoagulability<sup>16</sup> and  
49  
50  
51  
52  
53  
54  
55  
56  
57  
58  
59  
60

1  
2  
3  
4  
5  
6 hypofibrinolysis<sup>17</sup> also likely increased the frequency of AMI onset in the morning.  
7

8  
9 It is also possible that external factors, such as physical exertion and mental  
10  
11 stress, could be triggers for the morning onset of AMI.<sup>18</sup> In the present study, the  
12  
13 younger (<65 years old), working, male, and smoker subpopulations had a sharp  
14  
15 morning peak of AMI onset compared with the elderly, nonworking, female, and  
16  
17 nonsmoking subpopulations (Figure 3B,C,F,G). The sharpness of the morning  
18  
19 peak might be related to increased susceptibility to physical and mental stresses  
20  
21 in these subpopulations, in which they are more likely to start activities or go to  
22  
23 work soon after waking up. Similarly, the sharp and early morning peak of AMI  
24  
25 onset that was detected on Monday may be due to the increased physical and  
26  
27 mental stress that is associated with the first morning of the week (Figure 2). We  
28  
29 also found that the morning peak occurred latest on Sunday (Figure 2). Together,  
30  
31 these findings strongly suggest that mental and physical activity and/or stress  
32  
33 may act as a trigger for the morning onset of AMI.  
34  
35  
36  
37  
38  
39  
40  
41  
42  
43  
44  
45

46 Although many reports have examined the primary peak of AMI onset,  
47  
48 relatively little attention has been paid to the secondary peak. We demonstrated  
49  
50 that drinkers had a higher, sharper, and later nighttime peak of AMI onset than  
51  
52 nondrinkers (Figure 3D). Moreover, the nighttime peak on Saturday was the  
53  
54  
55  
56  
57  
58  
59  
60

1  
2  
3  
4  
5  
6 highest and sharpest amongst the seven days of the week (Figure 2). This  
7  
8  
9 observation may be explained by the fact that people might likely consume  
10  
11  
12 alcohol and engage in social activities on Saturday night in Japan. Thus, these  
13  
14  
15 evening activities can result in increased sympathetic nerve activity and  
16  
17  
18 therefore may have contributed to the increased frequency of AMI onset at night.  
19  
20 Taken together, our findings suggest that both the morning and nighttime peaks  
21  
22  
23 of AMI onset are influenced by physiological and socioeconomic factors.  
24  
25  
26  
27  
28

### 29 **Associations of lifestyle-related factors with circadian patterns of AMI** 30 31 **onset**

32  
33  
34 Many previous studies on circadian pattern of AMI onset considered gender, age,  
35  
36  
37 working status as potential factors affecting the circadian patterns of AMI  
38  
39  
40 onset.<sup>1,4-6</sup> Here, we additionally incorporated laboratory data, disease, and other  
41  
42  
43 socioeconomic factors into our analyses and found that several lifestyle-related  
44  
45  
46 factors, including admission serum TG and blood glucose levels, age, gender,  
47  
48  
49 working status, and smoking and drinking habits had statistically significant  
50  
51  
52 **associations with** the circadian pattern of AMI onset. Among these factors,  
53  
54  
55 elevated serum TG levels ( $\geq 150$  mg/dl) on admission had the largest  
56  
57  
58  
59  
60

1  
2  
3  
4  
5  
6 associations with circadian patterns of AMI onset, while the amplitude of serum  
7  
8  
9 TG levels on admission in patients with AMI didn't have circadian variation  
10  
11  
12 (p=0.52) (eFigure 2).  
13

14  
15 There are several evidences to support our findings. First, fasting  
16  
17 hypertriglyceridemia and postprandial hyperlipidemia, which is characterized by  
18  
19 postprandial accumulation of TG-rich lipoproteins and their partially hydrolyzed  
20  
21 products, are both closely related to the development of atherosclerotic  
22  
23 cardiovascular diseases.<sup>19-21</sup> Several studies have also reported that elevated  
24  
25 serum TG levels are associated with an increased risk of myocardial  
26  
27 infarction.<sup>22-23</sup> Hypertriglyceridemia is associated with increased  
28  
29 thrombogenicity,<sup>24-25</sup> which is reportedly associated with increased plasminogen  
30  
31 activator inhibitor-1 (PAI-1)<sup>26-28</sup> and factor VII coagulant activities,<sup>29-30</sup> and  
32  
33 viscosity.<sup>31</sup> These three factors have also been reported to affect the  
34  
35 development of MI.<sup>32-34</sup> Moreover, hypertriglyceridemia is also related to  
36  
37 endothelium dysfunction,<sup>35-36</sup> which contributes to the pathogenesis of coronary  
38  
39 artery disease.<sup>37</sup> In healthy subjects, serum TG levels also exhibit circadian  
40  
41 variation with a peak around 3 AM.<sup>38</sup> Thus, it is conceivable that patients with  
42  
43 hypertriglycemia have further augmented TG levels and are therefore exposed  
44  
45  
46  
47  
48  
49  
50  
51  
52  
53  
54  
55  
56  
57  
58  
59  
60

1  
2  
3  
4  
5  
6 to increased thrombogenicity and endothelium dysfunction in the early morning  
7  
8  
9 hours before dawn, which may explain the accentuated morning peak of AMI  
10  
11  
12 onset in patients with admission TG  $\geq 150$  mg/dl. Finally, it is reported that high  
13  
14  
15 plasma PAI-1 levels and excessive surges in morning blood pressure are  
16  
17  
18 independently and additively associated with increased risk of stroke in older  
19  
20  
21 hypertensive patients.<sup>39</sup> Thus, these lines of evidence strongly support our  
22  
23  
24 observation of a higher morning risk of AMI onset in the subpopulation with  
25  
26  
27 admission hypertriglyceridemia.  
28  
29  
30  
31

32 **Altered circadian patterns of AMI onset in patients with increased TG**  
33  
34  
35 **levels on admission.**  
36

37  
38 To our knowledge, this is the first study to demonstrate an association between  
39  
40  
41 admission serum TG levels and circadian patterns of AMI onset, as  
42  
43  
44 characterized by a lack of an evening peak in AMI onset in the subgroup of  
45  
46  
47 serum TG levels on admission  $\geq 150$  mg/dl compared to all other subgroups  
48  
49  
50 (Figure 3). While LDL/HDL levels are considered to be closely associated with  
51  
52  
53 the development of atherosclerosis, LDL/HDL levels were not associated with  
54  
55  
56 onset patterns of AMI in the present study. **Although the precise mechanisms for**  
57  
58  
59  
60

1  
2  
3  
4  
5  
6 the altered circadian patterns of AMI onset in patients with increased admission  
7  
8  
9 serum TG levels are unclear, increased serum TG might have influenced  
10  
11  
12 peripheral clocks residing in various tissues throughout the body, disrupting  
13  
14  
15 circadian patterns of AMI onset. Indeed, recent studies have shown that energy  
16  
17  
18 metabolism is an important modulator of peripheral circadian clock in  
19  
20  
21 cardiovascular tissues.<sup>40-41</sup>  
22

23  
24 Our subpopulation analyses also revealed that the circadian patterns of  
25  
26 AMI onset in patients with admission TG levels of  $\geq 150$  mg/dl had a sharp  
27  
28  
29 morning peak during weekdays, whereas no such peak was detected on  
30  
31  
32 Saturday or Sunday. This observation strongly suggests that increased  
33  
34  
35 thrombogenicity and endothelium dysfunction was a factor, but not the trigger,  
36  
37  
38 for the morning onset of AMI in our study cohort. Thus, it is conceivable that the  
39  
40  
41 accentuated morning peak of AMI onset in patients with admission TG  $\geq 150$   
42  
43  
44 mg/dl may be due to the combination of the following three factors: 1) increased  
45  
46  
47 hypercoagulability, hypofibrinolysis, viscosity, and endothelium dysfunction  
48  
49  
50 resulting from elevated serum TG levels, 2) increased risk of a morning surge of  
51  
52  
53 blood pressure and heart rate, and 3) mental and physical stresses.  
54  
55  
56  
57  
58  
59  
60



## One-year mortality according to AMI onset time

The association between AMI onset time and mortality is controversial. For example, Manfredini et al.<sup>42</sup> reported that patients with a morning onset of AMI are characterized by higher fatal outcome, independent of site and size of infarction, while Bae et al.<sup>43</sup> reported that patients with an evening-onset AMI had the worst one-year mortality in association with poor baseline clinical characteristics. On the other hand, Holmes et al.<sup>44</sup> observed no significant association between circadian patterns of onset time and in-hospital mortality in patients with ST-elevation myocardial infarction (STEMI) after adjusting for clinical risk factors.

In the present study, patients with an afternoon onset of AMI had the worst 1-year mortality (Figure 4A). However, the baseline clinical characteristics were comparable among the four onset-time groups in our study cohort. Indeed, stratification for potential confounding variables did not generally change the results, suggesting that the increased prognostic risk of AMI in the afternoon-onset group was not simply explained by differences in baseline characteristics in the present study (Figure 4B). Anyway, the patient background and physiological circadian rhythms might complexly interact with each other

1  
2  
3  
4  
5  
6 and affect mortality after AMI, which could lead to these different results among  
7  
8  
9 the studies and difficulty in interpreting the results. Further investigations are  
10  
11  
12 required to clarify the association of mortality after AMI and onset time.  
13

### 14 15 16 17 18 **Limitations**

19  
20 A few limitations of the present study warrant mention. First, this was an analysis  
21  
22 of prospective observational study and the results may have therefore been  
23  
24 influenced by potential confounding factors, even after adjustment for baseline  
25  
26 clinical and angiographic characteristics. Thus, caution is needed when  
27  
28 interpreting the data and making generalizations to other cohorts. Second, the  
29  
30 laboratory findings, including serum TG levels, were evaluated on admission.  
31  
32 Therefore, we could not exclude the influence of food consumption and circadian  
33  
34 variation of several factors, particularly serum TG levels, making interpretation of  
35  
36 the data difficult. However, our results also demonstrated that serum TG levels  
37  
38 were not likely the final trigger for AMI onset, as patients with TG  $\geq 150$  mg/dl on  
39  
40 admission did not exhibit a morning peak of AMI onset on the weekend. In  
41  
42 patients with hypertriglycemia, hypercoagulability, hypofibrinolysis, viscosity and  
43  
44 endothelium dysfunction are generally increased during the early morning hours  
45  
46  
47  
48  
49  
50  
51  
52  
53  
54  
55  
56  
57  
58  
59  
60

1  
2  
3  
4  
5  
6 before dawn,<sup>26-31,35-36,38</sup> resulting in enhanced susceptibility to AMI onset. Thus,  
7  
8  
9 under such conditions, it is conceivable that increased sympathetic activity,  
10  
11  
12 which was further enhanced in association with mental, physical, and/or other  
13  
14  
15 factors, could be the final trigger for AMI onset on weekday mornings in patients  
16  
17  
18 with TG  $\geq$ 150 mg/dl on admission. Based on these findings, the influence of  
19  
20  
21 meal intake and circadian variation of serum TG levels on the morning peak of  
22  
23  
24 AMI onset in the population with TG  $\geq$ 150 mg/dl may be minimal, if not  
25  
26  
27 negligible.

## 32 Conclusions

33  
34  
35 In our large cohort of consecutive AMI patients, the circadian pattern of AMI  
36  
37  
38 onset exhibited bimodality and was shown to be associated with several  
39  
40  
41 lifestyle-related factors. Among these factors, increased serum TG levels on  
42  
43  
44 admission had the most marked association with circadian variation, which was  
45  
46  
47 characterized by an increased morning risk of AMI onset during weekdays in this  
48  
49  
50 subpopulation. Our findings may help to identify the underlying triggers and  
51  
52  
53 substrates of AMI onset and help suggest preventive measures of AMI. However,  
54  
55  
56 cautions are warranted to interpret our results and confirmation in other cohorts  
57  
58  
59  
60

1  
2  
3  
4  
5  
6 is required.  
7  
8  
9  
10

11 **Author affiliations**  
12

13  
14  
15 1: Department of Cardiovascular Medicine, Osaka University Graduate School of  
16  
17  
18 Medicine, Suita, Japan  
19

20  
21 2: Department of Biomedical Statistics, Osaka University Graduate School of  
22  
23  
24 Medicine, Suita, Japan  
25

26  
27 3: Department of Advanced Cardiovascular Therapeutics, Osaka University  
28  
29  
30 Graduate School of Medicine, Suita, Japan  
31

32  
33 4: Department of Cardiovascular Medicine, Tohoku University Graduate School  
34  
35  
36 of Medicine, Sendai, Japan  
37

38  
39 5: Department of Social and Environmental Medicine, Osaka University  
40  
41  
42 Graduate School of Medicine, Suita, Japan  
43

44  
45 6: School of Human Welfare Studies Health Care Center and Clinic, Kwansai  
46  
47  
48 Gakuin University, Nishinomiya, Japan  
49

50  
51 7: Department of Community Medicine, Osaka University Graduate School of  
52  
53  
54 Medicine, Suita, Japan  
55

56  
57 8: Osaka Prefectural Hospital Organization Osaka Medical Center for Cancer  
58  
59  
60

1  
2  
3  
4  
5  
6 and Cardiovascular Diseases, Osaka, Japan  
7

8  
9 9: Department of Cardiovascular Medicine, University of Tokyo Graduate School  
10  
11 of Medicine, Tokyo, Japan  
12

### 13 14 **Contributors**

15  
16  
17 RE and YKS (Yasuhiko Sakata) participated in study concept and design. DN,  
18  
19 SS, MU, SM and MH participated in acquisition of data. RE, YKS, SY and TH  
20  
21 participated in analysis and interpretation of the data. YKS, TK, HS, SH, YSS  
22  
23 (Yasushi Sakata), SY, MH and TH participated in drafting and critical revision of  
24  
25 the manuscript for important intellectual content. RE and TH participated in  
26  
27 statistical analysis. YKS, HS, SN, MH and IK obtained funding.  
28  
29  
30  
31  
32  
33  
34

### 35 **Funding**

36  
37 This work was supported by Grants-in-Aid for University and Society  
38  
39 Collaboration (#19590816 and #19390215) from the Japanese Ministry of  
40  
41 Education, Culture, Sports, Science and Technology, Tokyo, Japan.  
42  
43  
44  
45

### 46 **Competing interests**

47  
48  
49 Dr. Komuro has received research grants and speaker's fees from Takeda  
50  
51 Pharmaceutical Company, Astellas Pharma, DAIICHI SANKYO COMPANY,  
52  
53 Boehringer Ingelheim, Novartis Pharma and Shionogi. No other authors have  
54  
55  
56  
57  
58  
59  
60

relationships with industry to disclose or financial associations that might pose a conflict of interest in connection with the submitted article.

### **Patient consent**

Obtained.

### **Ethics approval**

The study protocol has been approved by the ethics committee of each participating hospital.

### **Data sharing statement**

No additional data available.

### **Acknowledgements**

We thank Mariko Kishida, Rie Nagai, Nanase Muraoka, Hiroko Takemori, Akiko Yamagishi, Kumiko Miyoshi, Chizuru Hamaguchi, Hiroko Machida, Mariko Yoneda, Nagisa Yoshioka, Mayuko Tomatsu, Kyoko Tatsumi, Tomoko Mizuoka, Shigemi Kohara, Junko Tsugawa, Junko Isotani, Sachiko Ashibe, and all other OACIS research coordinators and nurses for their excellent assistance with data collection.

### **Appendix**

The OACIS Investigators

1  
2  
3  
4  
5  
6 Chair: Issei Komuro, Department of Cardiovascular Medicine, Osaka University  
7

8  
9 Graduate School of Medicine, 2-2 Yamada-oka, Suita 565-0871, Japan  
10

11 Secretariats: Yasuhiko Sakata (Chief), Daisaku Nakatani, Shinichiro Suna,  
12

13  
14 Masaya Usami, Sen Matsumoto, Masahiko Hara, Mariko Kishida, Rie Nagai:  
15

16  
17 Department of Cardiovascular Medicine, Osaka University Graduate School of  
18

19  
20 Medicine, Suita, Japan  
21

22  
23 Investigators (institutions listed in alphabetical order):  
24

25  
26 Yoshiyuki Kijima, Yusuke Nakagawa, Minoru Ichikawa, Higashi-Osaka City  
27

28  
29 General Hospital, Higashi-Osaka, Japan; Young-Jae Lim, Shigeo Kawano,  
30

31  
32 Kawachi General Hospital, Higashi-Osaka, Japan; Hiroshi Sato, Kwasnsei  
33

34  
35 Gakuin University, Nishinomiya, Japan; Takashi Shimazu, Hisakazu Fuji,  
36

37  
38 Kazuhiro Aoki, Kobe Ekisaikai Hospital, Kobe, Japan; Seiki Nagata, Yoshio  
39

40  
41 Ishida, Masaaki Uematsu, Tetsuya Watanabe, Masashi Fujita, Masaki Awata,  
42

43  
44 Kansai Rosai Hospital, Amagasaki, Japan; Michio Sugii, Meiwa Hospital,  
45

46  
47 Nishinomiya, Japan; Masatake Fukunami, Takahisa Yamada, Takashi Morita,  
48

49  
50 Osaka General Medical Center, Osaka, Japan; Shinji Hasegawa, Nobuyuki  
51

52  
53 Ogasawara, Osaka Kosei Nenkin Hospital, Osaka, Japan; Tatsuya Sasaki,  
54

55  
56 Yoshinori Yasuoka, Osaka Minami Medical Center, National Hospital  
57  
58  
59  
60

1  
2  
3  
4  
5  
6 Organization, Kawachinagano, Japan; Hideo Kusuoka, Yukihiro Koretsune,  
7  
8  
9 Yoshio Yasumura, Keiji Hirooka, Osaka Medical Center, National Hospital  
10  
11  
12 Organization, Osaka, Japan; Masatsugu Hori (previous Chair), Osaka  
13  
14 Prefectural Hospital Organization Osaka Medical Center for Cancer and  
15  
16 Cardiovascular Diseases; Kazuhisa Kodama, Yasunori Ueda, Kazunori  
17  
18 Kashiwase, Akio Hirata, Mayu Nishio, Mitsutoshi Asai, Osaka Police Hospital,  
19  
20  
21 Osaka, Japan; Yoshio Yamada, Jun Tanouchi, Masami Nishino, Hiroyasu Kato,  
22  
23  
24 Ryu Shutta, Osaka Rosai Hospital, Sakai, Japan; Shintaro Beppu, Akio Kohama,  
25  
26  
27 Hiroyoshi Yamamoto, Osaka Seamens Insurance Hospital, Osaka, Japan; Issei  
28  
29  
30 Komuro, Shinsuke Nanto, Kinya Otsu, Yasushi Matsumura, Kazuhiro Yamamoto,  
31  
32  
33 Tetsuo Minamino, Satoru Sumitsuji, Yasuhiko Sakata, Shungo Hikoso, Daisaku  
34  
35  
36 Nakatani, Osaka University Graduate School of Medicine, Suita, Japan; Toru  
37  
38  
39 Hayashi, Yasuji Doi, Ken-ichiro Okada, Noritoshi Ito, Saiseikai Senri Hospital,  
40  
41  
42 Suita, Japan; Kenshi Fujii, Katsuomi Iwakura, Atsushi Okamura, Motoo Date,  
43  
44  
45 Yoshiharu Higuchi, Sakurabashi Watanabe Hospital, Osaka, Japan; Noriyuki  
46  
47  
48 Akehi, Settsu Iseikai Hospital, Settsu, Japan; Eiji Hishida, Teramoto Memorial  
49  
50  
51 Hospital, Kawachinagano, Japan; and Shiro Hoshida, Kazuhiko Hashimura,  
52  
53  
54 Takayoshi Adachi, Yao Municipal Hospital, Yao, Japan.  
55  
56  
57  
58  
59  
60



## References

1. Muller JE, Stone PH, Turi ZG, et al. Circadian Variation in the Frequency of Onset of Acute Myocardial Infarction. *N Engl J Med.* 1985;313:1315-22.
2. Mahmoud KD, Lennon RJ, Ting HH, Rihal CS, Holmes DR Jr. Circadian variation in coronary stent thrombosis. *JACC Cardiovasc Interv.* 2011;4:183-90.
3. Muller JE, Tofler GH, Stone PH. Circadian variation and triggers of onset of acute cardiovascular disease. *Circulation.* 1989;79:733-43.
4. Kinjo K, Sato H, Sato H, et al; Osaka Acute Coronary Insufficiency Study (OACIS) Group. Circadian variation of the onset of acute myocardial infarction in the Osaka area, 1998-1999: characterization of morning and nighttime peaks. *Jpn Circ J.* 2001;65:617-20.
5. Peters RW, Zoble RG, Liebson PR, Pawitan Y, Brooks MM, Proschan M. Identification of a secondary peak in myocardial infarction onset 11 to 12 hours after awakening: the Cardiac Arrhythmia Suppression Trial (CAST) experience. *J*

1  
2  
3  
4  
5  
6 Am Coll Cardiol. 1993;22:998-1003.  
7  
8  
9

10  
11 6. Itaya H, Takagi T, Sugi K, Nakamura M. Contents of second peak in the  
12 circadian variation of acute myocardial infarction in the Japanese population. J  
13  
14  
15  
16  
17  
18  
19  
20  
21  
22  
23  
24  
25  
26  
27  
28  
29  
30  
31  
32  
33  
34  
35  
36  
37  
38  
39  
40  
41  
42  
43  
44  
45  
46  
47  
48  
49  
50  
51  
52  
53  
54  
55  
56  
57  
58  
59  
60  
Cardiol. 2012;59:147-53.

7. Tsukada T, Ikeda T, Ishiguro H, et al. Circadian variation in out-of-hospital  
cardiac arrests due to cardiac cause in a Japanese patient population. *Circ J*.  
2010;74:1880-7.

8. Willich SN, Löwel H, Lewis M, Hörmann A, Arntz HR, Keil U. Weekly variation  
of acute myocardial infarction. Increased Monday risk in the working population.  
*Circulation*. 1994;90:87-93.

9. Hara M, Sakata Y, Nakatani D, et al; Osaka Acute Coronary Insufficiency  
Study (OACIS) Investigators. Low levels of serum n-3 polyunsaturated fatty  
acids are associated with worse heart failure-free survival in patients after acute  
myocardial infarction. *Circ J*. 2013;1:153-162.

- 1  
2  
3  
4  
5  
6  
7  
8  
9 10. Nakatani D, Sakata Y, Suna S, et al; Osaka Acute Coronary Insufficiency  
10  
11 Study (OACIS) Investigators. Impact of beta blockade therapy on long-term  
12  
13 mortality after ST-segment elevation acute myocardial infarction in the  
14  
15 percutaneous coronary intervention era. *Am J Cardiol.* 2013;111:457-464.  
16  
17  
18  
19  
20  
21  
22  
23 11. Gao F, Chia KS, Krantz I, Nordin P, Machin D. On the application of the von  
24  
25 Mises distribution and angular regression methods to investigate the seasonality  
26  
27 of disease onset. *Stat Med.* 2006;25:1593-618.  
28  
29  
30  
31  
32  
33  
34  
35 12. Stergiou GS, Vemmos KN, Pliarchopoulou KM, Synetos AG, Roussias LG,  
36  
37 Mountokalakis TD. Parallel morning and evening surge in stroke onset, blood  
38  
39 pressure, and physical activity. *Stroke.* 2002;33:1480-6.  
40  
41  
42  
43  
44  
45  
46 13. Degaute JP, van de Borne P, Linkowski P, Van Cauter E. Quantitative  
47  
48 analysis of the 24-hour blood pressure and heart rate patterns in young men.  
49  
50  
51  
52  
53  
54  
55  
56  
57  
58  
59  
60

1  
2  
3  
4  
5  
6 14. Kotsis V, Stabouli S, Bouldin M, Low A, Toumanidis S, Zakopoulos N. Impact  
7  
8 of obesity on 24-hour ambulatory blood pressure and hypertension.

9  
10  
11 Hypertension. 2005;45:602-7.  
12  
13

14  
15  
16  
17 15. Thrall G, Lane D, Carroll D, Lip GY. A systematic review of the prothrombotic  
18  
19 effects of an acute change in posture: a possible mechanism underlying the  
20  
21 morning excess in cardiovascular events? Chest. 2007;132:1337-47.  
22  
23  
24

25  
26  
27  
28 16. Tofler GH, Brezinski D, Schafer AI, et al. Concurrent morning increase in  
29  
30 platelet aggregability and the risk of myocardial infarction and sudden cardiac  
31  
32 death. N Engl J Med. 1987;316:1514-8.  
33  
34  
35

36  
37  
38  
39 17. Andreotti F, Davies GJ, Hackett DR, et al. Major circadian fluctuations in  
40  
41 fibrinolytic factors and possible relevance to time of onset of myocardial  
42  
43 infarction, sudden cardiac death and stroke. Am J Cardiol. 1988;62:635-7.  
44  
45  
46

47  
48  
49  
50 18. Tofler GH, Muller JE. Triggering of acute cardiovascular disease and  
51  
52 potential preventive strategies. Circulation. 2006;114:1863-72.  
53  
54  
55

1  
2  
3  
4  
5  
6  
7  
8  
9 19. Hokanson JE, Austin MA. Plasma triglyceride level is a risk factor for  
10  
11 cardiovascular disease independent of high-density lipoprotein cholesterol level:  
12  
13 a meta-analysis of population-based prospective studies. J Cardiovasc Risk.  
14  
15 1996;3:213-9.  
16  
17  
18  
19

20  
21  
22  
23 20. Iso H, Naito Y, Sato S, et al. Serum triglycerides and risk of coronary heart  
24  
25 disease among Japanese men and women. Am J Epidemiol. 2001;153:490-9.  
26  
27  
28  
29

30  
31  
32 21. Masuda D, Sugimoto T, Tsujii K, et al. Correlation of fasting serum  
33  
34 apolipoprotein B-48 with coronary artery disease prevalence. Eur J Clin Invest.  
35  
36 2012;42:992-9.  
37  
38  
39

40  
41  
42  
43 22. Stampfer MJ, Krauss RM, Ma J, et al. A prospective study of triglyceride level,  
44  
45 low-density lipoprotein particle diameter, and risk of myocardial infarction. JAMA.  
46  
47 1996;276:882-8.  
48  
49  
50

51  
52  
53  
54  
55 23. Nordestgaard BG, Benn M, Schnohr P, Tybjaerg-Hansen A. Nonfasting  
56  
57  
58  
59  
60

1  
2  
3  
4  
5  
6 triglycerides and risk of myocardial infarction, ischemic heart disease, and death  
7  
8  
9 in men and women. JAMA. 2007;298:299-308.

10  
11  
12  
13  
14 24. No authors listed. Hypertriglyceridaemia and vascular risk. Report of a  
15  
16 meeting of physicians and scientists, University College London Medical School.  
17  
18  
19  
20 Lancet. 1993;342:781-7.  
21  
22

23  
24  
25  
26 25. Rosenson RS, Lowe GD. Effects of lipids and lipoproteins on thrombosis and  
27  
28  
29  
30  
31  
32  
33  
34  
35  
36  
37  
38  
39  
40  
41  
42  
43  
44  
45  
46  
47  
48  
49  
50  
51  
52  
53  
54  
55  
56  
57  
58  
59  
60  
rheology. Atherosclerosis. 1998;140:271-80.

36  
37  
38  
39  
40  
41  
42  
43  
44  
45  
46  
47  
48  
49  
50  
51  
52  
53  
54  
55  
56  
57  
58  
59  
60  
26. Hamsten A, Wiman B, de Faire U, Blombäck M. Increased plasma levels of a  
rapid inhibitor of tissue plasminogen activator in young survivors of myocardial  
infarction. N Engl J Med. 1985;313:1557-63.

46  
47  
48  
49  
50  
51  
52  
53  
54  
55  
56  
57  
58  
59  
60  
27. Mehta J, Mehta P, Lawson D, Saldeen T. Plasma tissue plasminogen  
activator inhibitor levels in coronary artery disease: correlation with age and  
serum triglyceride concentrations. J Am Coll Cardiol. 1987;9:263-8.

- 1  
2  
3  
4  
5  
6 28. Eriksson P, Nilsson L, Karpe F, Hamsten A. Very-low-density lipoprotein  
7  
8  
9 response element in the promoter region of the human plasminogen activator  
10  
11  
12 inhibitor-1 gene implicated in the impaired fibrinolysis of hypertriglyceridemia.  
13  
14  
15 Arterioscler Thromb Vasc Biol. 1998;18:20-6.  
16  
17  
18  
19  
20  
21 29. Mitropoulos KA, Miller GJ, Reeves BE, Wilkes HC, Cruickshank JK. Factor  
22  
23  
24 VII coagulant activity is strongly associated with the plasma concentration of  
25  
26  
27 large lipoprotein particles in middle-aged men. Atherosclerosis. 1989;76:203-8.  
28  
29  
30  
31  
32 30. Bruckert E, Carvalho de Sousa J, Giral P, et al. Interrelationship of plasma  
33  
34  
35 triglyceride and coagulant factor VII levels in normotriglyceridemic  
36  
37  
38 hypercholesterolemia. Atherosclerosis. 1989;75:129-34.  
39  
40  
41  
42  
43  
44 31. Rosenson RS, Shott S, Tangney CC. Hypertriglyceridemia is associated with  
45  
46  
47 an elevated blood viscosity Rosenson: triglycerides and blood viscosity.  
48  
49  
50 Atherosclerosis. 2002;161:433-9.  
51  
52  
53  
54  
55  
56 32. Hamsten A, de Faire U, Walldius G, et al. Plasminogen activator inhibitor in  
57  
58  
59  
60

1  
2  
3  
4  
5  
6 plasma: risk factor for recurrent myocardial infarction. *Lancet*. 1987;2:3-9.  
7  
8  
9

10  
11 33. Meade TW, Mellows S, Brozovic M, et al. Haemostatic function and  
12 ischaemic heart disease: principal results of the Northwick Park Heart Study.  
13  
14  
15  
16  
17 *Lancet*. 1986;2:533-7.  
18  
19

20  
21  
22  
23 34. Lowe GD, Lee AJ, Rumley A, Price JF, Fowkes FG. Blood viscosity and risk  
24 of cardiovascular events: the Edinburgh Artery Study. *Br J Haematol*.  
25  
26  
27  
28  
29 1997;96:168-73.  
30  
31

32  
33  
34  
35 35. Lundman P, Eriksson M, Schenck-Gustafsson K, Karpe F, Tornvall P.  
36  
37  
38 Transient triglyceridemia decreases vascular reactivity in young, healthy men  
39  
40  
41 without risk factors for coronary heart disease. *Circulation*. 1997;96:3266-8.  
42  
43  
44

45  
46 36. Kugiyama K, Doi H, Motoyama T, et al. Association of remnant lipoprotein  
47  
48  
49 levels with impairment of endothelium-dependent vasomotor function in human  
50  
51  
52 coronary arteries. *Circulation*. 1998;97:2519-26.  
53  
54  
55



1  
2  
3  
4  
5  
6 37. Zeiher AM, Drexler H, Saurbier B, Just H. Endothelium-mediated coronary  
7  
8 blood flow modulation in humans. Effects of age, atherosclerosis,  
9  
10 hypercholesterolemia, and hypertension. J Clin Invest. 1993;92:652-62.  
11  
12

13  
14  
15  
16  
17 38. Rivera-Coll A, Fuentes-Arderiu X, Díez-Noguera A. Circadian rhythmic  
18  
19 variations in serum concentrations of clinically important lipids. Clin Chem.  
20  
21 1994;40:1549-53.  
22  
23  
24  
25

26  
27  
28  
29 39. Kario K, Yano Y, Matsuo T, Hoshida S, Eguchi K, Shimada K. Additional  
30  
31 impact of morning haemostatic risk factors and morning blood pressure surge on  
32  
33 stroke risk in older Japanese hypertensive patients. Eur Heart J.  
34  
35 2011;32:574-80.  
36  
37  
38  
39

40  
41  
42  
43 40. Richards J, Gumz ML. Advances in understanding the peripheral circadian  
44  
45 clocks. FASEB J. 2012;26:3602-13.  
46  
47  
48

49  
50  
51  
52 41. Kohsaka A, Waki H, Cui H, Gouraud SS, Maeda M. Integration of metabolic  
53  
54 and cardiovascular diurnal rhythms by circadian clock. Endocr J.  
55  
56  
57

1  
2  
3  
4  
5  
6 2012;59:447-56.  
7  
8  
9

10  
11 42. Manfredini R, Boari B, Bressan S, et al. Influence of circadian rhythm on  
12 mortality after myocardial infarction: data from a prospective cohort of  
13 emergency calls. Am J Emerg Med. 2004;22:555-9.  
14  
15  
16  
17  
18  
19

20  
21  
22  
23 43. Bae MH, Ryu HM, Lee JH, et al. The impact of circadian variation on  
24 12-month mortality in patients with acute myocardial infarction. Korean Circ J.  
25  
26  
27  
28  
29 2010;40:616-24.  
30  
31  
32

33  
34  
35 44. Holmes DR Jr, Aguirre FV, Aplin R, et al. Circadian rhythms in patients with  
36 ST-elevation myocardial infarction. Circ Cardiovasc Qual Outcomes.  
37  
38  
39  
40  
41 2010;3:382-9.  
42  
43  
44  
45  
46  
47  
48  
49  
50  
51  
52  
53  
54  
55  
56  
57  
58  
59  
60

**Table 1.** Demographics and clinical characteristics of the study population

|                                     | N=7755           |
|-------------------------------------|------------------|
| <b>Patients</b>                     |                  |
| Age (years)                         | 66 (57-74)       |
| Male (%)                            | 5872 (75.7)      |
| Job (%)                             | 3364 (48.2)      |
| BMI (kg/m <sup>2</sup> )            | 23.4 (21.4-25.7) |
| <b>Cardiovascular risk factors</b>  |                  |
| Smoker (%)                          | 4865 (63.9)      |
| Drinker (%)                         | 3321 (45.3)      |
| Diabetes (%)                        | 2586 (33.4)      |
| Hypertension (%)                    | 4424 (58.9)      |
| Dyslipidemia (%)                    | 3259 (44.1)      |
| Previous MI (%)                     | 983 (13.0)       |
| Angina pectoris (%)                 | 1737 (23.4)      |
| Multivessel disease (%)             | 2790 (38.4)      |
| Collateral circulation (%)          | 2576 (35.7)      |
| <b>Clinical presentation</b>        |                  |
| Onset admission time<24h(%)         | 6804 (89.1)      |
| Killip ≥ II (%)                     | 1331 (18.0)      |
| Initial TIMI ≤ II (%)               | 4759 (68.4)      |
| STEMI (%)                           | 6567 (86.0)      |
| <b>Laboratory data on admission</b> |                  |
| Blood glucose level (mg/dl)         | 152 (122-209)    |
| HDL cholesterol (mg/dl)             | 44 (37-53)       |
| LDL cholesterol (mg/dl)             | 121 (99-147)     |
| Triglycerides (mg/dl)               | 92 (58-142)      |
| HbA1c (%)                           | 5.9 (5.5-6.9)    |
| Peak CK (IU/l)                      | 2147 (1069-4006) |
| eGFR (ml/min/1.73 m <sup>2</sup> )  | 64.5 (49.2-80.9) |
| <b>Localization of MI</b>           |                  |
| LAD                                 | 3050 (41.7)      |
| RCA                                 | 2447 (33.4)      |
| LCX                                 | 998 (13.6)       |

LMT

164 (2.2)

---

BMI = body mass index; MI = myocardial infarction; STEMI = ST-elevation myocardial infarction; HDL = high density lipoprotein; LDL = low density lipoprotein; TG = triglyceride ; HbA1c = hemoglobin A1c; CK = creatinine phosphokinase; eGFR = estimated glomerular filtration rate; LAD = left anterior descending artery; LCX = left circumflex artery; LMT = left main trunk; RCA = right coronary artery. Categorical variables are presented as number (percentage), and continuous variables are presented as quartile. Laboratory data were measured on admission. Smoker was defined as patients with smoking history, and drinker was defined as active drinker. Number (percentage) of Localization of MI was calculated out of 7319 patients who underwent coronary angiography.

## Figure legends

### Figure 1. Circadian pattern of AMI onset in the overall population.

A circadian pattern of AMI onset in the overall population was clearly observed in a circular plot (A) and histogram (B). The solid line corresponds to the fitted von Mises distribution, and the dots with error bars are the estimated peak onset times and 95% confidence intervals (CI), respectively.

### Figure 2. Circadian pattern of AMI onset according to day of the week.

Circadian patterns of AMI onset based on the day of the week are shown. The estimated peak onset time and 95% CIs are shown below each circular plot.

\* P values from the likelihood ratio (LR) test to examine whether the circadian pattern of AMI onset was uniform, unimodal, or bimodal.

### Figure 3. Circadian pattern of AMI onset based on lifestyle-related factors.

(A) Circular plots of the circadian pattern of AMI onset in the subpopulation with TG levels  $\geq 150$  and  $< 150$  mg/dl, and the circular plot of the corresponding fitted von Mises distributions for each subgroup are shown. (B)-(M) Circular plots of

1  
2  
3  
4  
5  
6 the fitted von Mises distributions of each subgroup based on smoking habit, age,  
7  
8  
9 drinking habit, BG levels, gender, and working status, LDL levels, HDL levels,  
10  
11  
12 Hba1c levels, Hypertension, Diabetes and Dyslipidemia.

13  
14  
15 \* P values from the LR test to examine whether the circadian pattern of AMI  
16  
17  
18 onset was uniform, unimodal, or bimodal in each subgroup.

19  
20  
21 † P values from the hierarchical LR test to examine whether each factor affected  
22  
23  
24 the circadian pattern of AMI onset.

25  
26  
27  
28  
29 **Figure 4 . One-year mortality according to the onset time of AMI onset**

30  
31  
32 **(A) One-year mortality among the four subgroups based on AMI onset time.**

33  
34  
35 **(B) Hazard ratios (HRs) for one-year mortality in the afternoon-onset group**  
36  
37  
38 **versus the other three onset-time groups.**

39  
40  
41 Kaplan-Meier survival curves of one-year mortality among the four AMI onset  
42  
43  
44 time subgroups (A). A p value from the log-rank test was used to examine  
45  
46  
47 difference in the Kaplan-Meier curves. HR and 95%CI, and p value for the  
48  
49  
50 overall population was calculated using univariable Cox regression analysis. The  
51  
52  
53 HRs and 95%CI, and p values for the individual potential confounding variables  
54  
55  
56 were calculated using stratified Cox regression analysis, in which the variables  
57  
58  
59  
60

1  
2  
3  
4  
5  
6 were included into the model as stratification factors (B).  
7  
8  
9

10  
11 **eFigure 1. Circadian pattern of AMI onset according to day of the week in**  
12 **the subpopulation with admission serum TG  $\geq 150$  and  $< 150$  mg/dl.**  
13

14  
15  
16  
17 Circular plots of the fitted von Mises distributions for the subpopulation with  
18 admission serum TG  $\geq 150$  and  $< 150$  mg/dl according to the day of the week are  
19  
20  
21 shown.  
22  
23  
24

25  
26 \* P values from the LR test to examine whether the circadian pattern of AMI  
27  
28 onset was uniform, unimodal, or bimodal in each subgroup.  
29  
30  
31

32  
33  
34  
35 **eFigure2. Circadian distribution of serum TG levels on admission**  
36 **according to AMI onset time.**  
37

38  
39  
40 Circadian distribution of serum TG levels on admission based on AMI onset time  
41  
42 is shown. Red solid line represents the model of circadian distribution of serum  
43  
44 TG levels on admission fitted by Cosinor-analysis, and blue dot line represents  
45  
46 no circadian change.  
47  
48  
49

50  
51  
52 \* P-value from F-test for the existence of a rhythm (amplitude) to examine  
53  
54 whether the amplitude of serum TG levels on admission in patients with AMI had  
55  
56  
57  
58

1  
2  
3  
4  
5  
6  
7  
8  
9  
10  
11  
12  
13  
14  
15  
16  
17  
18  
19  
20  
21  
22  
23  
24  
25  
26  
27  
28  
29  
30  
31  
32  
33  
34  
35  
36  
37  
38  
39  
40  
41  
42  
43  
44  
45  
46  
47  
48  
49  
50  
51  
52  
53  
54  
55  
56  
57  
58  
59  
60

circadian variation or not.

For peer review only



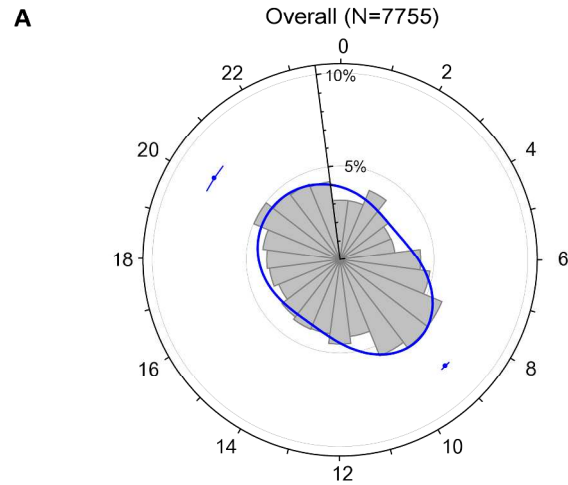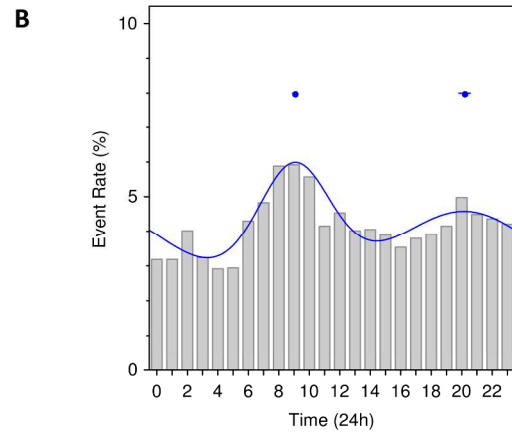

Estimated peaks of AMI onset  
 9:01 h ( 95%CI: 8:53- 9:08 h)  
 20:11 h ( 95%CI: 19:48-20:34 h)

Circadian pattern of AMI onset in the overall population /  
 A circadian pattern of AMI onset in the overall population was clearly observed in a circular plot (A) and histogram (B). The solid line corresponds to the fitted von Mises distribution, and the dots with error bars are the estimated peak onset times and 95% confidence intervals (CI), respectively.

209x297mm (300 x 300 DPI)

1  
2  
3  
4  
5  
6  
7  
8  
9  
10  
11  
12  
13  
14  
15  
16  
17  
18  
19  
20  
21  
22  
23  
24  
25  
26  
27  
28  
29  
30  
31  
32  
33  
34  
35  
36  
37  
38  
39  
40  
41  
42  
43  
44  
45  
46  
47  
48  
49  
50  
51  
52  
53  
54  
55  
56  
57  
58  
59  
60

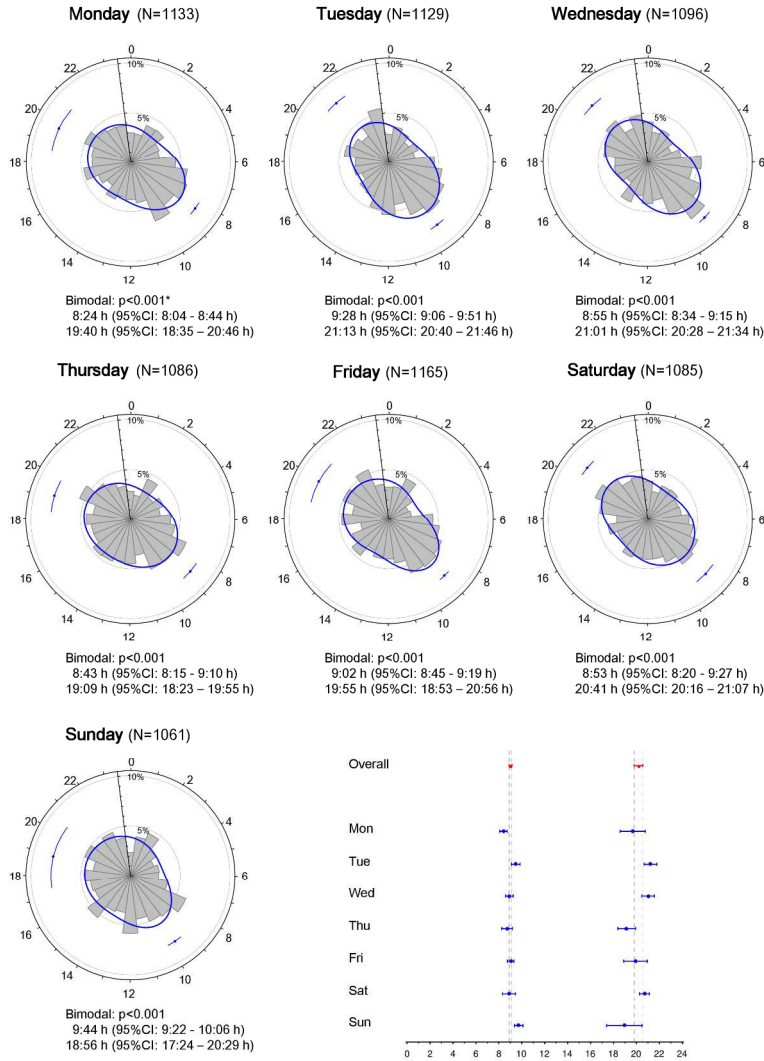

Circadian pattern of AMI onset according to day of the week / Circadian patterns of AMI onset based on the day of the week are shown. The estimated peak onset time and 95% CIs are shown below each circular plot.

\* P values from the likelihood ratio (LR) test to examine whether the circadian pattern of AMI onset was uniform, unimodal, or bimodal.

209x297mm (300 x 300 DPI)

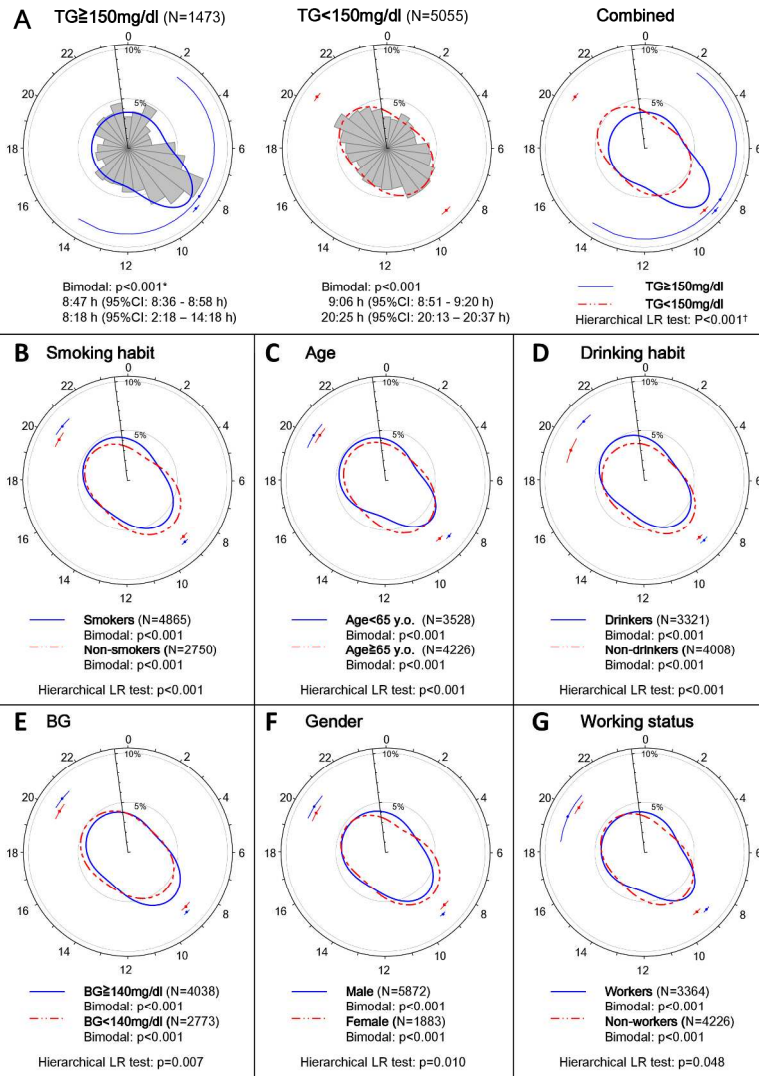

209x297mm (300 x 300 DPI)

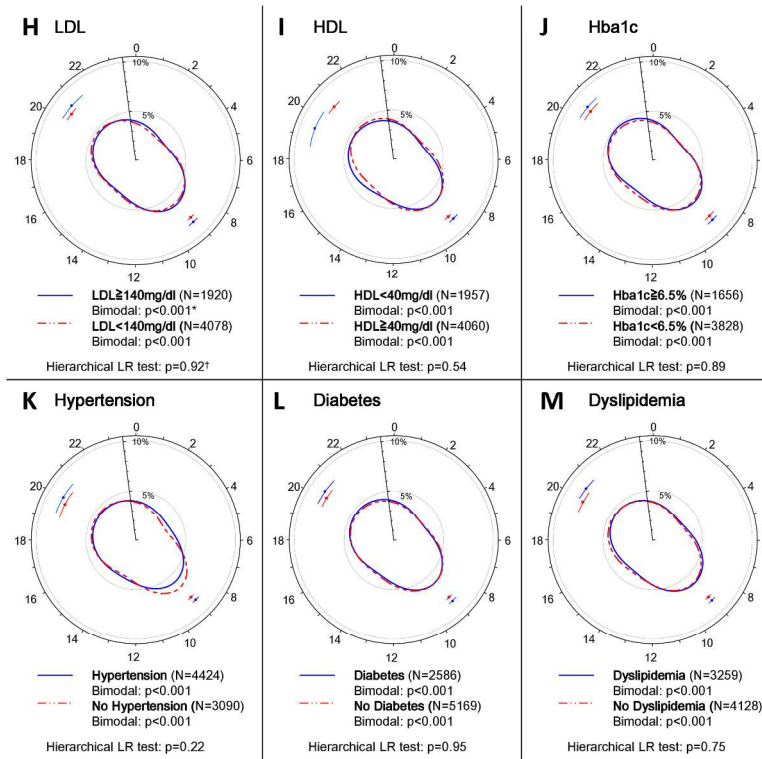

Circadian pattern of AMI onset based on lifestyle-related factors / (A) Circular plots of the circadian pattern of AMI onset in the subpopulation with TG levels  $\geq 150$  and  $< 150$  mg/dl, and the circular plot of the corresponding fitted von Mises distributions for each subgroup are shown. (B)-(M) Circular plots of the fitted von Mises distributions of each subgroup based on smoking habit, age, drinking habit, BG levels, gender, and working status, LDL levels, HDL levels, Hba1c levels, Hypertension, Diabetes and Dyslipidemia.

\* P values from the LR test to examine whether the circadian pattern of AMI onset was uniform, unimodal, or bimodal in each subgroup.  
 $\dagger$  P values from the hierarchical LR test to examine whether each factor affected the circadian pattern of AMI onset.

209x297mm (300 x 300 DPI)

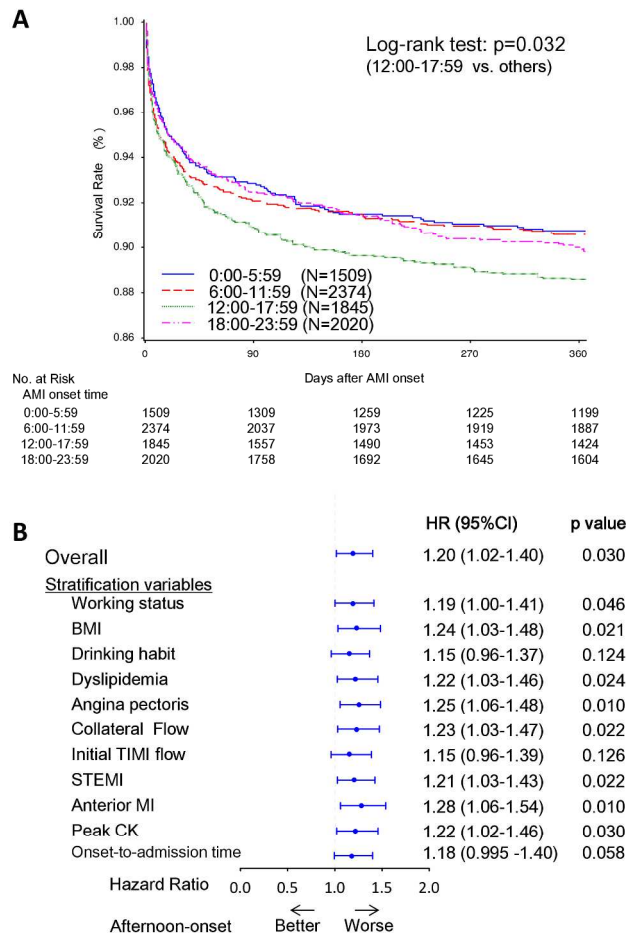

One-year mortality according to the onset time of AMI onset

(A) One-year mortality among the four subgroups based on AMI onset time. (B) Hazard ratios (HRs) for one-year mortality in the afternoon-onset group versus the other three onset-time groups. / Kaplan-Meier survival curves of one-year mortality among the four AMI onset time subgroups (A). A p value from the log-rank test was used to examine difference in the Kaplan-Meier curves. HR and 95%CI, and p value for the overall population was calculated using univariable Cox regression analysis. The HRs and 95%CIs, and p values for the individual potential confounding variables were calculated using stratified Cox regression analysis, in which the variables were included into the model as stratification factors (B).

209x297mm (300 x 300 DPI)

**eTable 1. Estimated time of peak AMI onset according to subgroup**

| Subgroup              | Estimated time of primary peak onset (95%CI)             | Estimated time of second peak onset (95%CI) |
|-----------------------|----------------------------------------------------------|---------------------------------------------|
| <b>TG</b>             |                                                          |                                             |
| ≥150 mg/dl*           | 8:47 h (8:36 - 8:58 h)<br><b>8:18 h (2:18 - 14:18 h)</b> | -----                                       |
| <150 mg/dl            | 9:06 h (8:51 - 9:20 h)                                   | 20:25 h (20:13 - 20:37 h)                   |
| <b>Smoking habit</b>  |                                                          |                                             |
| Yes                   | 9:07 h (8:57 - 9:18 h)                                   | 20:37 h (20:09 - 21:04 h)                   |
| No                    | 8:59 h (8:45 - 9:12 h)                                   | 20:01 h (19:38 - 20:24 h)                   |
| <b>Age</b>            |                                                          |                                             |
| <65 y.o.              | 8:45 h (8:36 - 8:55 h)                                   | 20:07 h (19:30 - 20:44 h)                   |
| ≥65 y.o.              | 9:09 h (8:57 - 9:20 h)                                   | 20:16 h (19:52 - 20:40 h)                   |
| <b>Drinking habit</b> |                                                          |                                             |
| Yes                   | 9:00 h (8:48 - 9:13 h)                                   | 20:54 h (20:29 - 21:20 h)                   |
| No                    | 9:03 h (8:53 - 9:14 h)                                   | 19:27 h (18:50 - 20:04 h)                   |
| <b>BG</b>             |                                                          |                                             |
| ≥140 mg/dl            | 9:03 h (8:53 - 9:12 h)                                   | 20:35 h (20:06 - 21:04 h)                   |
| <140 mg/dl            | 8:53 h (8:37 - 9:09 h)                                   | 20:03 h (19:38 - 20:27 h)                   |
| <b>Gender</b>         |                                                          |                                             |
| Male                  | 9:09 h (9:00 - 9:17 h)                                   | 20:09 h (19:34 - 20:45 h)                   |
| Female                | 8:47 h (8:31 - 9:04 h)                                   | 19:56 h (19:31 - 20:21 h)                   |
| <b>Working status</b> |                                                          |                                             |
| Yes                   | 8:51 h (8:41 - 9:01 h)                                   | 19:37 h (18:28 - 20:47 h)                   |
| No                    | 9:14 h (9:02 - 9:28 h)                                   | 20:15 h (19:55 - 20:36 h)                   |
| <b>LDL</b>            |                                                          |                                             |
| ≥ 140mg/dl            | 9:11 h (8:57 - 9:24 h)                                   | 20:36 h (19:39 - 21:34 h)                   |
| < 140mg/dl            | 9:04 h (8:53 - 9:15 h)                                   | 20:20 h (19:58 - 20:42 h)                   |
| <b>HDL</b>            |                                                          |                                             |
| < 40mg/dl             | 8:59 h (8:44 - 9:13 h)                                   | 19:26 h (18:35 - 20:17 h)                   |
| ≥ 40mg/dl             | 9:07 h (8:56 - 9:18 h)                                   | 20:45 h (20:23 - 21:07 h)                   |
| <b>HbA1c</b>          |                                                          |                                             |
| ≥6.5%                 | 8:59 h (8:43 - 9:16 h)                                   | 20:37 h (20:02 - 21:13 h)                   |
| <6.5%                 | 9:03 h (8:51 - 9:14 h)                                   | 20:16 h (19:49 - 20:42 h)                   |
| <b>Hypertension</b>   |                                                          |                                             |
| Yes                   | 8:59 h (8:48 - 9:10 h)                                   | 20:03 h (19:17 - 20:48 h)                   |

|              |                        |                           |
|--------------|------------------------|---------------------------|
| No           | 9:04 h (8:54 - 9:14 h) | 19:48 h (19:06 – 20:30 h) |
| Diabetes     |                        |                           |
| Yes          | 9:03 h (8:50 - 9:16 h) | 20:22 h (19:45 – 21:00 h) |
| No           | 9:03 h (8:53 - 9:13 h) | 20:09 h (19:42 – 20:36 h) |
| Dyslipidemia |                        |                           |
| Yes          | 9:01 h (8:49 - 9:13 h) | 20:31 h (19:59 – 21:02 h) |
| No           | 9:02 h (8:52 - 9:13 h) | 19:55 h (19:24 – 20:26 h) |

The estimated primary and secondary peak onsets and 95%CI of each subgroup are shown.

\* In patients with admission serum TG levels of  $\geq 150$ mg/dl, both peaks occurred in the morning and nearly overlapped. Therefore, this subpopulation was considered to have only morning peak of AMI onset.

**eTable 2. Baseline characteristics in patients based on triglyceride levels at admission**

|                                    | Triglycerides $\geq$ 150 mg/dl<br>(N=1473) | Triglycerides <150 mg/dl<br>(N=5055) | p value |
|------------------------------------|--------------------------------------------|--------------------------------------|---------|
| <b>Patients</b>                    |                                            |                                      |         |
| Age (years)                        | 60 (53-68)                                 | 67 (59-75)                           | <0.001  |
| Male (%)                           | 1233 (83.7)                                | 3725 (73.7)                          | <0.001  |
| Job (%)                            | 823 (62.3)                                 | 2083 (45.3)                          | <0.001  |
| BMI (kg/m <sup>2</sup> )           | 24.7 (22.6-27.0)                           | 23.1 (21.1-25.3)                     | <0.001  |
| <b>Cardiovascular risk factors</b> |                                            |                                      |         |
| Smoker (%)                         | 1058 (72.4)                                | 3028 (60.7)                          | <0.001  |
| Drinker (%)                        | 710 (50.4)                                 | 2104 (43.5)                          | <0.001  |
| Diabetes (%)                       | 581 (39.4)                                 | 1612 (31.9)                          | <0.001  |
| Hypertension (%)                   | 863 (59.9)                                 | 2954 (60.0)                          | 0.90    |
| Dyslipidemia (%)                   | 956 (67.2)                                 | 1917 (39.2)                          | <0.001  |
| Previous MI (%)                    | 176 (12.1)                                 | 638 (12.9)                           | 0.45    |
| Angina pectoris (%)                | 316 (22.0)                                 | 1131 (23.1)                          | 0.37    |
| Multivessel disease (%)            | 500 (35.6)                                 | 1910 (39.8)                          | 0.005   |
| Collateral circulation (%)         | 506 (36.4)                                 | 1728 (36.2)                          | 0.92    |
| <b>Clinical presentation</b>       |                                            |                                      |         |
| Onset admission<br>time<24h(%)     | 1304 (89.0)                                | 4444 (89.1)                          | 0.93    |
| Killip $\geq$ II (%)               | 190 (13.4)                                 | 877 (18.1)                           | <0.001  |
| Initial TIMI $\leq$ II (%)         | 919 (67.7)                                 | 3135 (68.1)                          | 0.75    |
| STEMI (%)                          | 1250 (85.6)                                | 4305 (86.1)                          | 0.60    |
| <b>Labortory data on admission</b> |                                            |                                      |         |
| Blood glucose (mg/dl)              | 159 (126-220)                              | 148 (121-203)                        | <0.001  |
| HDL cholesterol (mg/dl)            | 41 (36-49)                                 | 45 (38-54)                           | <0.001  |
| LDL cholesterol (mg/dl)            | 130 (104-157)                              | 120 (98-145)                         | <0.001  |
| Triglycerides (mg/dl)              | 199 (169-261)                              | 77 (51-105)                          | <0.001  |
| HbA1c (%)                          | 6.1 (5.6-7.4)                              | 5.9 (5.5-6.8)                        | <0.001  |
| Peak CK (IU/l)                     | 2097 (1062-3910)                           | 2187 (1083.5-4019.5)                 | 0.28    |
| eGFR (ml/min/1.73 m <sup>2</sup> ) | 65.7 (51.7-80.1)                           | 64.6 (49.3-81.9)                     | 0.21    |
| <b>Localization of MI</b>          |                                            |                                      |         |
| LAD                                | 570 (40.3)                                 | 2051 (42.5)                          | 0.153   |
| RCA                                | 512 (36.2)                                 | 1601 (33.2)                          |         |
| LCA                                | 215 (15.2)                                 | 652 (13.5)                           |         |
| LMT                                | 23 (1.6)                                   | 102 (2.1)                            |         |

Categorical variables are presented as number (percentage), and continuous variables are presented as



1  
2  
3  
4  
5  
6  
7  
8  
9  
10  
11  
12  
13  
14  
15  
16  
17  
18  
19  
20  
21  
22  
23  
24  
25  
26  
27  
28  
29  
30  
31  
32  
33  
34  
35  
36  
37  
38  
39  
40  
41  
42  
43  
44  
45  
46  
47  
48  
49  
50  
51  
52  
53  
54  
55  
56  
57  
58  
59  
60

quartiles.

Categorical variables were compared by the chi-square test, and continuous variables were compared by the Wilcoxon rank sum test for two-group comparisons.

For peer review only

1  
2  
3

eTable 3. Baseline characteristics among groups based on time of AMI onset

|                                           | 0:00-5:59 h<br>(N=1509) | 6:00-11:59 h<br>(N=2374) | 12:00-17:59 h<br>(N=1845) | 18:00-23:59 h<br>(N=2020) | p<br>value       |
|-------------------------------------------|-------------------------|--------------------------|---------------------------|---------------------------|------------------|
| <b>Patients</b>                           |                         |                          |                           |                           |                  |
| Age (years)                               | 66 (57-74)              | 66 (58-74)               | 66 (57-74)                | 65 (57-73)                | 0.077            |
| Male (%)                                  | 1166 (77.2)             | 1752 (73.7)              | 1412 (76.5)               | 1542 (76.2)               | 0.050            |
| Employed (%)                              | 656 (48.9)              | 1023 (47.7)              | 785 (47.0)                | 900 (49.2)                | 0.55             |
| BMI (kg/m <sup>2</sup> )                  | 23.4 (21.5-25.8)        | 23.4 (21.3-25.6)         | 23.6 (21.5-25.7)          | 23.4 (21.4-25.7)          | 0.44             |
| <b>Cardiovascular risk factors</b>        |                         |                          |                           |                           |                  |
| Smoker (%)                                | 974 (65.6)              | 1417 (60.8)              | 1166 (64.3)               | 1308 (65.8)               | 0.002            |
| Drinker (%)                               | 687 (47.9)              | 970 (43.3)               | 737 (42.4)                | 927 (48.4)                | <0.001           |
| Diabetes (%)                              | 520 (34.4)              | 784 (33.0)               | 612 (33.2)                | 670 (33.1)                | 0.80             |
| Hypertension (%)                          | 891 (60.4)              | 1326 (57.8)              | 1057 (59.1)               | 1150 (58.8)               | 0.47             |
| Dyslipidemia (%)                          | 636 (44.3)              | 1026 (45.3)              | 757 (43.0)                | 840 (43.7)                | 0.50             |
| Previous MI (%)                           | 177 (12.0)              | 291 (12.6)               | 230 (12.9)                | 285 (14.5)                | 0.140            |
| Angina pectoris (%)                       | 339 (23.4)              | 521 (22.9)               | 400 (22.7)                | 477 (24.7)                | 0.43             |
| Multivessel disease (%)                   | 533 (37.6)              | 828 (37.2)               | 663 (38.6)                | 766 (40.5)                | 0.151            |
| Collateral circulation (%)                | 517 (36.7)              | 750 (33.8)               | 636 (37.2)                | 673 (35.8)                | 0.129            |
| <b>Clinical presentation</b>              |                         |                          |                           |                           |                  |
| <b>Onset-to-admission time<br/>(hour)</b> | <b>4.7 (1.7 - 10.5)</b> | <b>3.0 (1.3 - 6.7)</b>   | <b>2.7 (1.2 - 7.5)</b>    | <b>3.0 (1.3 - 14.8)</b>   | <b>&lt;0.001</b> |
| Killip ≥ II (%)                           | 276 (19.0)              | 377 (16.6)               | 316 (18.0)                | 362 (18.8)                | 0.198            |
| Initial TIMI ≤ II (%)                     | 906 (66.9)              | 1457 (68.0)              | 1186 (71.6)               | 1210 (67.2)               | 0.014            |
| STEMI (%)                                 | 1258 (84.6)             | 2024 (86.5)              | 1588 (87.3)               | 1697 (85.2)               | 0.092            |
| Anterior MI (%)                           | 672 (46.9)              | 987 (43.9)               | 703 (40.5)                | 852 (44.9)                | 0.002            |
| <b>Laboratory data on admission</b>       |                         |                          |                           |                           |                  |
| Blood glucose level<br>(mg/dl)            | 151 (123 - 206)         | 155 (124 - 213)          | 149 (122 - 203)           | 149 (120 - 210)           | 0.033            |
| HDL cholesterol (mg/dl)                   | 44 (38-53)              | 44 (38-53)               | 44 (37-53)                | 44 (38-53)                | 0.42             |
| LDL cholesterol (mg/dl)                   | 123 (101-149)           | 123 (99-148)             | 121 (99-146)              | 119 (97-147)              | 0.171            |
| Triglycerides (mg/dl)                     | 91(57-141)              | 100 (63-155)             | 91.5 (58-140)             | 87 (54-132)               | <0.001           |
| HbA1c (%)                                 | 5.9 (5.5 - 7.0)         | 6.0 (5.5 - 6.9)          | 5.9 (5.5 - 6.8)           | 5.9 (5.5 - 7.0)           | 0.95             |
| Peak CK (IU/l)                            | 2137<br>(1089-3934.5)   | 2111<br>(1027-4144)      | 2104<br>(1095-3894)       | 2274<br>(1070-3985)       | 0.92             |
| <b>Treatment</b>                          |                         |                          |                           |                           |                  |
| Reperfusion (%)                           | 1349 (89.6)             | 2113 (89.2)              | 1645 (89.4)               | 1791 (88.8)               | 0.88             |
| PCI (%)                                   | 1316 (87.2)             | 2068 (87.1)              | 1601 (86.8)               | 1749 (86.6)               | 0.94             |

1  
2  
3  
4  
5  
6  
7  
8  
9  
10  
11  
12  
13  
14  
15  
16  
17  
18  
19  
20  
21  
22  
23  
24  
25  
26  
27  
28  
29  
30  
31  
32  
33  
34  
35  
36  
37  
38  
39  
40  
41  
42  
43  
44  
45  
46  
47  
48  
49  
50  
51  
52  
53  
54  
55  
56  
57  
58  
59  
60

Drugs at discharge

|                    |             |             |             |             |       |
|--------------------|-------------|-------------|-------------|-------------|-------|
| β blockers (%)     | 677 (44.9)  | 964 (40.6)  | 752 (40.8)  | 836 (41.4)  | 0.043 |
| RAS inhibitors (%) | 1038 (68.8) | 1594 (67.1) | 1240 (67.2) | 1386 (68.6) | 0.56  |
| Statin (%)         | 580 (38.4)  | 859 (36.2)  | 611 (33.1)  | 690 (34.2)  | 0.007 |
| Diuretics (%)      | 387 (25.7)  | 556 (23.4)  | 416 (22.6)  | 529 (26.2)  | 0.024 |
| Ca blockers (%)    | 335 (22.2)  | 493 (20.8)  | 333 (18.1)  | 398 (19.7)  | 0.020 |
| Antiplatelet (%)   | 1359 (90.1) | 2124 (89.5) | 1624 (88.0) | 1814 (89.8) | 0.197 |

Categorical variables are presented as number (percentage), and continuous variables are presented as quartiles. Categorical variables were compared by the chi-square test, and continuous variables were compared by the Kruskal-Wallis test for four-group comparisons.

For peer review only

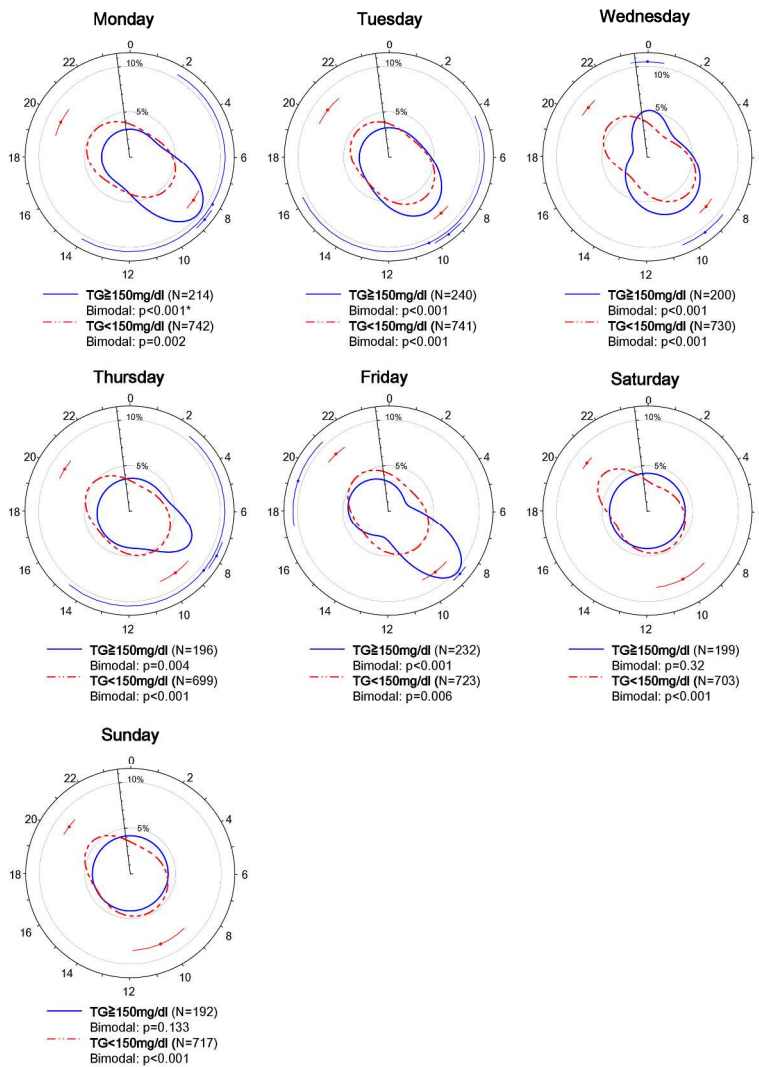

Circadian pattern of AMI onset according to day of the week in the subpopulation with admission serum TG  $\geq 150$  and  $< 150$  mg/dl / Circular plots of the fitted von Mises distributions for the subpopulation with admission serum TG  $\geq 150$  and  $< 150$  mg/dl according to the day of the week are shown.

\* P values from the LR test to examine whether the circadian pattern of AMI onset was uniform, unimodal, or bimodal in each subgroup.  
209x297mm (300 x 300 DPI)

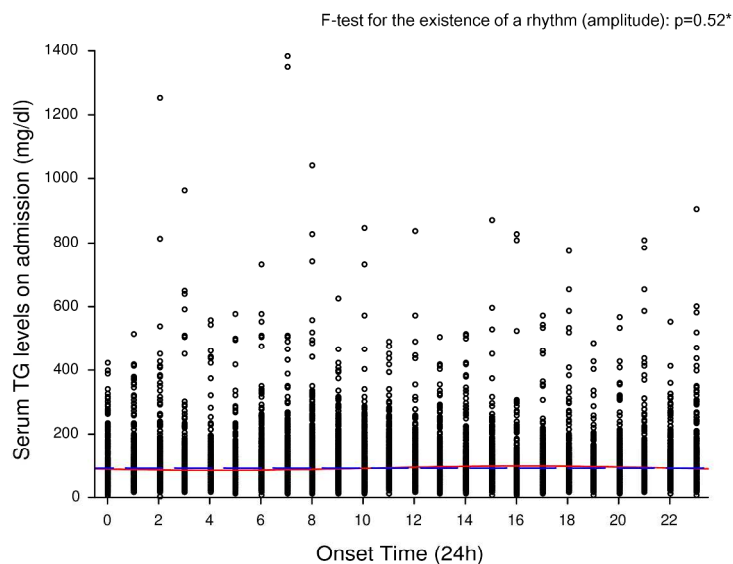

Circadian distribution of serum TG levels on admission according to AMI onset time / Circadian distribution of serum TG levels on admission based on AMI onset time is shown. Red solid line represents the model of circadian distribution of serum TG levels on admission fitted by Cosinor-analysis, and blue dot line represents no circadian change.

\* P-value from F-test for the existence of a rhythm (amplitude) to examine whether the amplitude of serum TG levels on admission in patients with AMI had circadian variation or not.

297x209mm (300 x 300 DPI)
